# Supplementary material for: Probability of vertical HIV transmission: A systematic review and meta-regression
Source: PubMed Central journal article supplement — medRxiv. 2025 Apr 17:2024.12.03.24318418. Originally published 2024 Dec 5. Preprint. [Version 2] doi: 10.1101/2024.12.03.24318418 (PMC11643157; doi:10.1101/2024.12.03.24318418), 2025-04-17
Supplement: media-1.pdf [file media-1.pdf]

## **Supplementary material**

### **Probability of vertical HIV transmission: A systematic review and meta-regression**

Magdalene K. Walters,\* Michelle Bulterys,\* Michael Barry, Diana Loudon, Sarah Hicks, Ann Richey, Margalit Sabin, Mary Mahy, John Stover, Robert Glaubius, Hmwe Kyu, Marie-Claude Boily, Lynne Mofenson, Kathleen Powis, Jeffrey Imai-Eaton

\*Indicates co-first authorship

## Contents

|                                                                                                                       |    |
|-----------------------------------------------------------------------------------------------------------------------|----|
| S1. Definitions, current default values, and source of vertical transmission probabilities used in Spectrum-AIM ..... | 3  |
| S2. 2024 systematic review .....                                                                                      | 6  |
| S2.2. PRISMA checklist .....                                                                                          | 6  |
| S2.3. Search strategy by data source .....                                                                            | 10 |
| S2.4. Variables extracted in systematic review .....                                                                  | 17 |
| S2.5. Perinatal transmission probability definition .....                                                             | 18 |
| S2.6. Monthly breastfeeding transmission probability definition.....                                                  | 18 |
| S3. Data used in meta-regression analysis.....                                                                        | 19 |
| S4. Meta-regression model estimates.....                                                                              | 36 |
| S4.1 Regression tables for all models .....                                                                           | 36 |
| S4.2 Study-level and pooled estimates of vertical transmission probability .....                                      | 38 |
| S5. Sensitivity analyses on meta-regression model assumptions .....                                                   | 47 |
| S5.1. Model one: VT probability from women not receiving PMTCT.....                                                   | 47 |
| S5.2. Model three: perinatal transmission probability from women receiving ART by timing of initiation .....          | 51 |
| S5.3 Geographic region as a confounder of ART class's effect on VT probability .....                                  | 55 |
| S6. Implications of estimated VT probabilities for Spectrum-AIM's estimates of paediatric HIV infections .....        | 56 |
| S7. References.....                                                                                                   | 65 |

## S1. Definitions, current default values, and source of vertical transmission probabilities used in Spectrum-AIM

Table S1.1 describes the definition of vertical transmission categories in the Spectrum-AIM model,<sup>1</sup> the default values used in model versions for UNAIDS global HIV estimates published 2019 through 2024, and source of the default. Most default values are weighted averages of studies identified in the 2018 Mofenson review.<sup>2</sup> Estimates of perinatal transmission probability for women who did not receive PMTCT have not been updated since the 2012 Rollins *et al.* systematic review.<sup>3</sup>

**Table S1.1.** Default Spectrum-AIM values of perinatal transmission probabilities

| <b>Transmission category</b>           | <b>Definition</b>                                                                                                                                          | <b>Default value</b> | <b>Source of default value</b>                                                                         |
|----------------------------------------|------------------------------------------------------------------------------------------------------------------------------------------------------------|----------------------|--------------------------------------------------------------------------------------------------------|
| <b>CD4 &lt; 200</b>                    | Existing infection, birthing parent did not use PMTCT and had a CD4 < 200.                                                                                 | 0.37                 | Median of studies from Rollins <i>et al.</i> 2012 systematic review                                    |
| <b>CD4 200-350</b>                     | Existing infection, birthing parent did not use PMTCT and had a CD4 200-350.                                                                               | 0.27                 | Median of studies from Rollins <i>et al.</i> 2012 systematic review                                    |
| <b>CD4 &gt; 350</b>                    | Existing infection, birthing parent did not use PMTCT and had a CD4 > 350.                                                                                 | 0.15                 | Median of studies from Rollins <i>et al.</i> 2012 systematic review                                    |
| <b>Maternal seroconversion</b>         | Mother seroconverted during pregnancy.                                                                                                                     | 0.181                | Weighted average from Mofenson 2018 systematic review update                                           |
| <b>Maternal single dose nevirapine</b> | Mother received only single dose nevirapine as part of PMTCT.                                                                                              | 0.075                | Weighted average from Mofenson 2018 systematic review update                                           |
| <b>WHO 2006 Dual ARV regimen</b>       | Mother utilized two ARV regimens for PMTCT.                                                                                                                | 0.022                | Weighted average of studies with women with CD4 > 350 from Mofenson 2018 systematic review update      |
| <b>Option A</b>                        | Mothers with CD4 > 350 used AZT from week 14 of gestation and single dose nevirapine at the onset of labor. Daily AZT/ 3TC used through 7 days postpartum. | 0.041                | Weighted average from Mofenson 2015 systematic review update                                           |
| <b>Option B</b>                        | Mothers with CD4 > 350 used triple ARVs starting at week 14 of gestation and continued through breastfeeding cessation.                                    | 0.019                | Weighted average of studies with breastfeeding populations from Mofenson 2018 systematic review update |

|                                                  |                                                                                                    |        |                                                              |
|--------------------------------------------------|----------------------------------------------------------------------------------------------------|--------|--------------------------------------------------------------|
| <b>Mother on ART &lt;4 weeks before delivery</b> | Triple ARVs were initiated <4 weeks before delivery and continued for life.                        | 0.082  | Weighted average from Mofenson 2018 systematic review update |
| <b>Mother on ART &gt;4 weeks before delivery</b> | Triple ARVs were initiated >4 weeks before delivery (but after conception) and continued for life. | 0.014  | Weighted average from Mofenson 2018 systematic review update |
| <b>Mother on ART preconception</b>               | Mother was on triple ARVs at conception and continued for life.                                    | 0.0026 | Weighted average from Mofenson 2018 systematic review update |

**Table S1.2.** Default Spectrum-AIM values of monthly breastfeeding transmission probabilities

| <b>Transmission category</b>                        | <b>Definition</b>                                                                                    | <b>Default value</b> | <b>Source of default value</b>                                                                                         |
|-----------------------------------------------------|------------------------------------------------------------------------------------------------------|----------------------|------------------------------------------------------------------------------------------------------------------------|
| <b>CD4 &lt; 200</b>                                 | Existing infection, birthing parent did not use PMTCT and had a CD4 < 200.                           | 0.0089               | Weighted average from Mofenson 2018 systematic review update of studies without a CD4 restriction                      |
| <b>CD4 200-350</b>                                  | Existing infection, birthing parent did not use PMTCT and had a CD4 200-350.                         | 0.0081               | It is unclear where the default value came from, this was not explicitly estimated in the 2012, 2015, or 2018 reviews. |
| <b>CD4 &gt; 350</b>                                 | Existing infection, birthing parent did not use PMTCT and had a CD4 > 350.                           | 0.0051               | Rollins <i>et al.</i> 2012 systematic review                                                                           |
| <b>Maternal seroconversion</b>                      | Mother seroconverted during pregnancy.                                                               | 0.269                | Weighted average from Mofenson 2018 systematic review update                                                           |
| <b>Maternal single dose nevirapine CD4 &lt; 350</b> | Mother received only single dose nevirapine as part of PMTCT.                                        | 0.0099               | Weighted average from Mofenson 2018 systematic review update                                                           |
| <b>Maternal single dose nevirapine CD4 &gt; 350</b> | Mother received only single dose nevirapine as part of PMTCT.                                        | 0.004                | Weighted average from Mofenson 2018 systematic review update                                                           |
| <b>WHO 2006 Dual ARV regimen</b>                    | Mother utilized two ARV regimens for PMTCT.                                                          | 0.0018               | Weighted average of studies that reported extended infant prophylaxis from Mofenson 2018 systematic review update      |
| <b>Option A</b>                                     | Mothers with CD4 > 350 used AZT from week 14 of gestation and single dose nevirapine at the onset of | 0.002                | Median of studies in the Rollins <i>et al.</i> 2012 systematic review.                                                 |

|                                           |                                                                                                            |        |                                                                                                                                        |
|-------------------------------------------|------------------------------------------------------------------------------------------------------------|--------|----------------------------------------------------------------------------------------------------------------------------------------|
|                                           | labor. Daily AZT/ 3TC used through 7 days postpartum.                                                      |        |                                                                                                                                        |
| <b>Option B</b>                           | Mothers with CD4 > 350 used triple ARVs starting at week 14 and continued through breastfeeding cessation. | 0.0013 | It is unclear where the default value came from, the Mofenson 2018 systematic review had a weighted average of 0.0011.                 |
| <b>On ART &lt;4 weeks before delivery</b> | Triple ARVs were initiated <4 weeks before delivery and continued for life.                                | 0.002  | Expert opinion from Rollins <i>et al.</i> 2012 systematic review                                                                       |
| <b>On ART &gt;4 weeks before delivery</b> | Triple ARVs were initiated >4 weeks before delivery (but after conception) and continued for life.         | 0.0011 | Weighted average of studies where birthing parent started ART at any time during pregnancy from Mofenson 2018 systematic review update |
| <b>On ART preconception</b>               | Mother was on triple ARVs at conception and continued for life.                                            | 0.0002 | Weighted average of studies from Mofenson 2018 systematic review update                                                                |

## S2. 2024 systematic review

### S2.2. PRISMA checklist

**Table S2.2.1.** PRISMA checklist

| Topic                          | No. | Summary                                                                                                                                                                                                                                                                                              | Location                                |
|--------------------------------|-----|------------------------------------------------------------------------------------------------------------------------------------------------------------------------------------------------------------------------------------------------------------------------------------------------------|-----------------------------------------|
| <b>Title</b>                   | 1   | Identify the report as a systematic review.                                                                                                                                                                                                                                                          | Title                                   |
| <b>Abstract</b>                | 2   | See the PRISMA 2020 for Abstracts checklist                                                                                                                                                                                                                                                          |                                         |
| <b>INTRODUCTION</b>            |     |                                                                                                                                                                                                                                                                                                      |                                         |
| <b>Rationale</b>               | 3   | Describe the rationale for the review in the context of existing knowledge.                                                                                                                                                                                                                          | Introduction                            |
| <b>Objectives</b>              | 4   | Provide an explicit statement of the objective(s) or question(s) the review addresses.                                                                                                                                                                                                               | Introduction                            |
| <b>METHODS</b>                 |     |                                                                                                                                                                                                                                                                                                      |                                         |
| <b>Eligibility criteria</b>    | 5   | Specify the inclusion and exclusion criteria for the review and how studies were grouped for the syntheses.                                                                                                                                                                                          | Methods                                 |
| <b>Information sources</b>     | 6   | Specify all databases, registers, websites, organisations, reference lists and other sources searched or consulted to identify studies. Specify the date when each source was last searched or consulted.                                                                                            | Methods                                 |
| <b>Search strategy</b>         | 7   | Present the full search strategies for all databases, registers and websites, including any filters and limits used.                                                                                                                                                                                 | Methods and Supplementary Material S2.3 |
| <b>Selection process</b>       | 8   | Specify the methods used to decide whether a study met the inclusion criteria of the review, including how many reviewers screened each record and each report retrieved, whether they worked independently, and if applicable, details of automation tools used in the process.                     | Methods and Figure 1                    |
| <b>Data collection process</b> | 9   | Specify the methods used to collect data from reports, including how many reviewers collected data from each report, whether they worked independently, any processes for obtaining or confirming data from study investigators, and if applicable, details of automation tools used in the process. | Methods                                 |
| <b>Data items</b>              | 10a | List and define all outcomes for which data were sought. Specify whether all results that were compatible with each outcome domain in each study were sought (e.g. for all measures, time points, analyses), and if not, the methods used to decide which results to collect.                        | Methods and Supplementary Material S2.4 |
|                                | 10b | List and define all other variables for which data were sought (e.g. participant and intervention characteristics, funding sources). Describe any                                                                                                                                                    | Methods and Supplementary Material S2.4 |

|                                      |     |                                                                                                                                                                                                                                                                   |                                                  |
|--------------------------------------|-----|-------------------------------------------------------------------------------------------------------------------------------------------------------------------------------------------------------------------------------------------------------------------|--------------------------------------------------|
|                                      |     | assumptions made about any missing or unclear information.                                                                                                                                                                                                        |                                                  |
| <b>Study risk of bias assessment</b> | 11  | Specify the methods used to assess risk of bias in the included studies, including details of the tool(s) used, how many reviewers assessed each study and whether they worked independently, and if applicable, details of automation tools used in the process. | Not applicable                                   |
| <b>Effect measures</b>               | 12  | Specify for each outcome the effect measure(s) (e.g. risk ratio, mean difference) used in the synthesis or presentation of results.                                                                                                                               | Methods and Supplementary Material S2.5 and S2.6 |
| <b>Synthesis methods</b>             | 13a | Describe the processes used to decide which studies were eligible for each synthesis (e.g. tabulating the study intervention characteristics and comparing against the planned groups for each synthesis (item 5)).                                               | Methods                                          |
|                                      | 13b | Describe any methods required to prepare the data for presentation or synthesis, such as handling of missing summary statistics, or data conversions.                                                                                                             | Methods and Supplementary Material S5            |
|                                      | 13c | Describe any methods used to tabulate or visually display results of individual studies and syntheses.                                                                                                                                                            | Methods and Supplementary Material S4.2          |
|                                      | 13d | Describe any methods used to synthesize results and provide a rationale for the choice(s). If meta-analysis was performed, describe the model(s), method(s) to identify the presence and extent of statistical heterogeneity, and software package(s) used.       | Methods                                          |
|                                      | 13e | Describe any methods used to explore possible causes of heterogeneity among study results (e.g. subgroup analysis, meta-regression).                                                                                                                              | Methods and Supplementary Material S5            |
|                                      | 13f | Describe any sensitivity analyses conducted to assess robustness of the synthesized results.                                                                                                                                                                      | Methods and Supplementary Material S5            |
| <b>Reporting bias assessment</b>     | 14  | Describe any methods used to assess risk of bias due to missing results in a synthesis (arising from reporting biases).                                                                                                                                           | Not applicable                                   |
| <b>Certainty assessment</b>          | 15  | Describe any methods used to assess certainty (or confidence) in the body of evidence for an outcome.                                                                                                                                                             | Methods                                          |
| <b>RESULTS</b>                       |     |                                                                                                                                                                                                                                                                   |                                                  |
| <b>Study selection</b>               | 16a | Describe the results of the search and selection process, from the number of records identified in the search to the number of studies included in the review, ideally using a flow diagram.                                                                      | Results and Figure 1                             |

|                                      |     |                                                                                                                                                                                                                                                                                      |                                       |
|--------------------------------------|-----|--------------------------------------------------------------------------------------------------------------------------------------------------------------------------------------------------------------------------------------------------------------------------------------|---------------------------------------|
|                                      | 16b | Cite studies that might appear to meet the inclusion criteria, but which were excluded, and explain why they were excluded.                                                                                                                                                          | Results and Figure 1                  |
| <b>Study characteristics</b>         | 17  | Cite each included study and present its characteristics.                                                                                                                                                                                                                            | Supplementary Material S3             |
| <b>Risk of bias in studies</b>       | 18  | Present assessments of risk of bias for each included study.                                                                                                                                                                                                                         | Not applicable                        |
| <b>Results of individual studies</b> | 19  | For all outcomes, present, for each study: (a) summary statistics for each group (where appropriate) and (b) an effect estimate and its precision (e.g. confidence/credible interval), ideally using structured tables or plots.                                                     | Supplementary Material S4.2           |
| <b>Results of syntheses</b>          | 20a | For each synthesis, briefly summarise the characteristics and risk of bias among contributing studies.                                                                                                                                                                               | Not applicable                        |
|                                      | 20b | Present results of all statistical syntheses conducted. If meta-analysis was done, present for each the summary estimate and its precision (e.g. confidence/credible interval) and measures of statistical heterogeneity. If comparing groups, describe the direction of the effect. | Results and Supplementary Material S4 |
|                                      | 20c | Present results of all investigations of possible causes of heterogeneity among study results.                                                                                                                                                                                       | Results and Supplementary Material S4 |
|                                      | 20d | Present results of all sensitivity analyses conducted to assess the robustness of the synthesized results.                                                                                                                                                                           | Results and Supplementary Material S4 |
| <b>Reporting biases</b>              | 21  | Present assessments of risk of bias due to missing results (arising from reporting biases) for each synthesis assessed.                                                                                                                                                              | Not applicable                        |
| <b>Certainty of evidence</b>         | 22  | Present assessments of certainty (or confidence) in the body of evidence for each outcome assessed.                                                                                                                                                                                  | Results                               |
| <b>DISCUSSION</b>                    |     |                                                                                                                                                                                                                                                                                      |                                       |
| <b>Discussion</b>                    | 23a | Provide a general interpretation of the results in the context of other evidence.                                                                                                                                                                                                    | Discussion                            |
|                                      | 23b | Discuss any limitations of the evidence included in the review.                                                                                                                                                                                                                      | Discussion                            |
|                                      | 23c | Discuss any limitations of the review processes used.                                                                                                                                                                                                                                | Discussion                            |
|                                      | 23d | Discuss implications of the results for practice, policy, and future research.                                                                                                                                                                                                       | Discussion                            |
| <b>OTHER INFORMATION</b>             |     |                                                                                                                                                                                                                                                                                      |                                       |



|                                                       |     |                                                                                                                                                                                                                                            |                |
|-------------------------------------------------------|-----|--------------------------------------------------------------------------------------------------------------------------------------------------------------------------------------------------------------------------------------------|----------------|
| <b>Registration and protocol</b>                      | 24a | Provide registration information for the review, including register name and registration number, or state that the review was not registered.                                                                                             | Methods        |
|                                                       | 24b | Indicate where the review protocol can be accessed, or state that a protocol was not prepared.                                                                                                                                             | Methods        |
|                                                       | 24c | Describe and explain any amendments to information provided at registration or in the protocol.                                                                                                                                            | Not applicable |
| <b>Support</b>                                        | 25  | Describe sources of financial or non-financial support for the review, and the role of the funders or sponsors in the review.                                                                                                              | Abstract       |
| <b>Competing interests</b>                            | 26  | Declare any competing interests of review authors.                                                                                                                                                                                         | Abstract       |
| <b>Availability of data, code and other materials</b> | 27  | Report which of the following are publicly available and where they can be found: template data collection forms; data extracted from included studies; data used for all analyses; analytic code; any other materials used in the review. | Methods        |

**Table S2.2.2.** PRISMA abstract checklist

| <b>Topic</b>                | <b>No.</b> | <b>Summary</b>                                                                                                                 | <b>Reported?</b> |
|-----------------------------|------------|--------------------------------------------------------------------------------------------------------------------------------|------------------|
| <b>Title</b>                | 1          | Identify the report as a systematic review.                                                                                    | Yes              |
| <b>BACKGROUND</b>           |            |                                                                                                                                |                  |
| <b>Objectives</b>           | 2          | Provide an explicit statement of the main objective(s) or question(s) the review addresses.                                    | Yes              |
| <b>METHODS</b>              |            |                                                                                                                                |                  |
| <b>Eligibility criteria</b> | 3          | Specify the inclusion and exclusion criteria for the review.                                                                   | Yes              |
| <b>Information sources</b>  | 4          | Specify the information sources (e.g. databases, registers) used to identify studies and the date when each was last searched. | Yes              |
| <b>Risk of bias</b>         | 5          | Specify the methods used to assess risk of bias in the included studies.                                                       | No               |
| <b>Synthesis of results</b> | 6          | Specify the methods used to present and synthesize results.                                                                    | Yes              |
| <b>RESULTS</b>              |            |                                                                                                                                |                  |
| <b>Included studies</b>     | 7          | Give the total number of included studies and participants and summarise relevant characteristics of studies.                  | Yes              |

|                                |    |                                                                                                                                                                                                                                                                                                       |     |
|--------------------------------|----|-------------------------------------------------------------------------------------------------------------------------------------------------------------------------------------------------------------------------------------------------------------------------------------------------------|-----|
| <b>Synthesis of results</b>    | 8  | Present results for main outcomes, preferably indicating the number of included studies and participants for each. If meta-analysis was done, report the summary estimate and confidence/credible interval. If comparing groups, indicate the direction of the effect (i.e. which group is favoured). | Yes |
| <b>DISCUSSION</b>              |    |                                                                                                                                                                                                                                                                                                       |     |
| <b>Limitations of evidence</b> | 9  | Provide a brief summary of the limitations of the evidence included in the review (e.g. study risk of bias, inconsistency and imprecision).                                                                                                                                                           | Yes |
| <b>Interpretation</b>          | 10 | Provide a general interpretation of the results and important implications.                                                                                                                                                                                                                           | Yes |
| <b>OTHER</b>                   |    |                                                                                                                                                                                                                                                                                                       |     |
| <b>Funding</b>                 | 11 | Specify the primary source of funding for the review.                                                                                                                                                                                                                                                 | Yes |
| <b>Registration</b>            | 12 | Provide the register name and registration number.                                                                                                                                                                                                                                                    | Yes |

### S2.3. Search strategy by data source

**Table S2.3.** Search strategy by data source used in the 2024 updated systematic review

| <b>Data source</b>                                            | <b>Search strategy</b>                                                                                                                                                                                                                                                                                                                                                                                                                                                                                                                                                                                                                                                                                                                                                                                                                                                                                                                                                                                                                                                                                                                                                                                                                                                                                                                                                                                                                     |
|---------------------------------------------------------------|--------------------------------------------------------------------------------------------------------------------------------------------------------------------------------------------------------------------------------------------------------------------------------------------------------------------------------------------------------------------------------------------------------------------------------------------------------------------------------------------------------------------------------------------------------------------------------------------------------------------------------------------------------------------------------------------------------------------------------------------------------------------------------------------------------------------------------------------------------------------------------------------------------------------------------------------------------------------------------------------------------------------------------------------------------------------------------------------------------------------------------------------------------------------------------------------------------------------------------------------------------------------------------------------------------------------------------------------------------------------------------------------------------------------------------------------|
| <b>PubMed (National Center for Biotechnology Information)</b> | <p>(({"HIV Infections"[Mesh] OR "HIV"[Mesh] OR "Acquired Immunodeficiency Syndrome"[Mesh] OR "Antiretroviral Therapy, Highly Active"[Mesh] OR "Anti-HIV Agents"[Mesh] OR "Anti-Retroviral Agents"[Mesh] OR "human immunodeficiency virus"[ti] OR "human immunodeficiency virus"[ti] OR "human immuno deficiency virus"[ti] OR "human immune deficiency virus"[ti] OR HIV[ti] OR HIV1[ti] OR HIV2[ti] OR "acquired immunodeficiency syndrome"[ti] OR "acquired immunodeficiency syndrome"[ti] OR "acquired immunodeficiency syndrome"[ti] OR "acquired immune deficiency syndrome"[ti] OR antiretroviral*[ti] OR "anti retroviral"[ti]) <b>AND</b> {"Pregnancy"[Mesh] OR "Pregnancy Complications, Infectious"[Mesh] OR "Pregnant Women"[Mesh] OR "Delivery, Obstetric"[Mesh] OR "Peripartum Period"[Mesh] OR "Postpartum Period"[Mesh] OR "Breast Feeding"[Mesh] OR "Infectious Disease Transmission, Vertical"[Mesh] OR PMTCT[tiab] OR MTCT[tiab] OR "mother to child"[tiab] OR "parent to child"[tiab] OR vertical*[tiab] OR intrauterine[tiab] OR "intra uterine"[tiab] OR intrapartum[tiab] OR "intra partum"[tiab] OR pregnant[tiab] OR pregnancy[tiab] OR prenatal*(tiab] OR "pre natal*" (tiab] OR antenatal*(tiab] OR "ante natal*" (tiab] OR perinatal*(tiab] OR "peri natal*" (tiab] OR puerperium[tiab] OR postnatal*(tiab] OR "post natal*" (tiab] OR postpartum[tiab] OR "post partum"[tiab] OR peripartum[tiab] OR "peri</p> |

|                          |                                                                                                                                                                                                                                                                                                                                                                                                                                                                                                                                                                                                                                                                                                                                                                                                                                                                                                                                                                                                                                                                                                                                                                                                                                                                                                                                                                                                                                                                                                                                                                                                                                                                                                                                                                                                                                      |
|--------------------------|--------------------------------------------------------------------------------------------------------------------------------------------------------------------------------------------------------------------------------------------------------------------------------------------------------------------------------------------------------------------------------------------------------------------------------------------------------------------------------------------------------------------------------------------------------------------------------------------------------------------------------------------------------------------------------------------------------------------------------------------------------------------------------------------------------------------------------------------------------------------------------------------------------------------------------------------------------------------------------------------------------------------------------------------------------------------------------------------------------------------------------------------------------------------------------------------------------------------------------------------------------------------------------------------------------------------------------------------------------------------------------------------------------------------------------------------------------------------------------------------------------------------------------------------------------------------------------------------------------------------------------------------------------------------------------------------------------------------------------------------------------------------------------------------------------------------------------------|
|                          | <p>partum"[tiab] OR "in utero"[tiab] OR fetomaternal*[tiab] OR "feto maternal*"[tiab] OR "maternal fetal"[tiab] OR fetus*[tiab] OR foetus*[tiab]<br/> OR fetal*[tiab] OR foetal*[tiab] OR neonat*[tiab] OR breastfeed*[tiab] OR<br/> "breast feeding"[tiab] OR "breast fed"[tiab] OR breastmilk[tiab] OR "breast<br/> milk"[tiab] OR delivery[tiab] OR birth[tiab]) <b>AND</b> {"Infant"[Mesh] OR "Infant,<br/> Newborn"[Mesh] OR "Child"[Mesh] OR infant[tiab] OR infants[tiab] OR<br/> infancy[tiab] OR newborn*(tiab) OR "new born"[tiab] OR neonat*(tiab) OR<br/> child*(tiab) OR baby[tiab] OR babies[tiab]) <b>AND</b> {"Infectious Disease<br/> Transmission, Vertical"[Mesh] OR transmit*[tiab] OR transmission*[tiab] OR<br/> infection* OR infected)) <b>OR</b> ("HIV Infections"[Mesh] OR "HIV<br/> infection*"[tiab] OR HIV[ti]) <b>AND</b> {"Pregnancy Complications,<br/> Infectious"[Mesh] OR "Infectious Disease Transmission,<br/> Vertical"[Mesh] OR "vertical transmission"[tiab:~3] OR "vertical<br/> infection"[tiab:~3] OR "vertical<br/> infections"[tiab:~3] OR "mother to child" OR "parent to child" OR<br/> MTCT OR<br/> PMTCT OR "perinatal transmission"[tiab:~3] OR "perinatal<br/> infection"[tiab:~3]<br/> OR "perinatally acquired"[tiab:~3])) <b>AND</b> {"2018"[Date -<br/> Publication] :<br/> "3000"[Date - Publication]) <b>AND</b> "English"[la] <b>NOT</b><br/> (("Animals"[Mesh] OR macaque*[tiab]) NOT "Humans"[Mesh]) <b>NOT</b><br/> (("Cross-Sectional Studies"[Mesh] OR "editorial"[Publication Type]<br/> OR "letter"[Publication Type] OR "comment"[Publication Type] OR<br/> "news"[Publication Type] OR "Case Reports" [Publication Type] OR<br/> "Case Reports as Topic"[Mesh]) NOT ("Systematic Review"<br/> [Publication Type] OR "Meta-Analysis" [Publication<br/> Type]))</p> |
| <b>Embase (Elsevier)</b> | <p>((('Human immunodeficiency virus infection'/de OR 'acquired<br/> immune deficiency syndrome'/de OR 'AIDS related complex'/de<br/> OR 'acute HIV infection'/de OR 'Human immunodeficiency virus 1<br/> infection'/de OR 'Human immunodeficiency virus 2 infection'/de<br/> OR 'AIDS related complex'/de OR 'human immunodeficiency<br/> virus'/exp OR 'highly active antiretroviral therapy'/exp OR 'anti<br/> human immunodeficiency virus agent'/de OR 'antiretrovirus<br/> agent'/de OR 'human immunodeficiency virus':ti OR 'human<br/> immunodeficiency virus':ti OR 'human immunodeficiency virus':ti<br/> OR 'human immune deficiency virus':ti OR 'hiv':ti OR 'hivl':ti OR<br/> 'hiv2':ti OR 'acquired immunodeficiency syndrome':ti OR 'acquired<br/> immunodeficiency syndrome':ti OR 'acquired immuno deficiency<br/> syndrome':ti OR 'acquired immune deficiency syndrome':ti OR<br/> 'antiretroviral*':ti OR 'anti retroviral':ti) <b>AND</b> ('pregnancy'/exp OR<br/> 'infectious pregnancy complications'/exp OR 'pregnant<br/> woman'/exp OR 'obstetric delivery'/exp OR 'perinatal period'/exp<br/> OR 'puerperium'/exp OR 'breast feeding'/exp OR 'vertical<br/> transmission'/exp OR 'pmtct':ti,ab,kw OR 'mtct':ti,ab,kw OR</p>                                                                                                                                                                                                                                                                                                                                                                                                                                                                                                                                                                                 |

|                                       |                                                                                                                                                                                                                                                                                                                                                                                                                                                                                                                                                                                                                                                                                                                                                                                                                                                                                                                                                                                                                                                                                                                                                                                                                                                                                                                                                                                                                                                                                                                                                                                                                                                                                                                                                                                                                                                                                                                                                                                                                                                                                                                                                                                                                                                                                   |
|---------------------------------------|-----------------------------------------------------------------------------------------------------------------------------------------------------------------------------------------------------------------------------------------------------------------------------------------------------------------------------------------------------------------------------------------------------------------------------------------------------------------------------------------------------------------------------------------------------------------------------------------------------------------------------------------------------------------------------------------------------------------------------------------------------------------------------------------------------------------------------------------------------------------------------------------------------------------------------------------------------------------------------------------------------------------------------------------------------------------------------------------------------------------------------------------------------------------------------------------------------------------------------------------------------------------------------------------------------------------------------------------------------------------------------------------------------------------------------------------------------------------------------------------------------------------------------------------------------------------------------------------------------------------------------------------------------------------------------------------------------------------------------------------------------------------------------------------------------------------------------------------------------------------------------------------------------------------------------------------------------------------------------------------------------------------------------------------------------------------------------------------------------------------------------------------------------------------------------------------------------------------------------------------------------------------------------------|
|                                       | <p>'mother to child':ti,ab,kw OR 'parent to child':ti,ab,kw OR 'vertical*':ti,ab,kw OR 'intrauterine':ti,ab,kw OR 'intrauterine':ti,ab,kw OR 'intrapartum':ti,ab,kw OR 'intrapartum':ti,ab,kw OR 'pregnant':ti,ab,kw OR 'pregnancy':ti,ab,kw OR 'prenatal*':ti,ab,kw OR 'pre natal*':ti,ab,kw OR 'antenatal*':ti,ab,kw OR 'ante natal*':ti,ab,kw OR 'perinatal*':ti,ab,kw OR 'peri natal*':ti,ab,kw OR 'puerperium':ti,ab,kw OR 'postnatal*':ti,ab,kw OR 'postnatal*':ti,ab,kw OR 'postpartum':ti,ab,kw OR 'post partum':ti,ab,kw OR 'peripartum':ti,ab,kw OR 'peri partum':ti,ab,kw OR 'in utero':ti,ab,kw OR 'fetomaternal*':ti,ab,kw OR 'feto maternal*':ti,ab,kw OR 'maternal fetal':ti,ab,kw OR 'fetus*':ti,ab,kw OR 'foetus*':ti,ab,kw OR 'fetal*':ti,ab,kw OR 'foetal*':ti,ab,kw OR 'neonat*':ti,ab,kw OR 'breastfeed*':ti,ab,kw OR 'breast feeding':ti,ab,kw OR 'breast fed':ti,ab,kw OR 'breastmilk':ti,ab,kw OR 'breast milk':ti,ab,kw OR 'delivery':ti,ab,kw OR 'birth':ti,ab,kw) <b>AND</b> ('infant'/exp OR 'newborn'/exp OR 'child'/exp OR 'infant':ti,ab,kw OR 'infants':ti,ab,kw OR 'infancy':ti,ab,kw OR 'newborn*':ti,ab,kw OR 'new born':ti,ab,kw OR 'neonat*':ti,ab,kw OR 'child*':ti,ab,kw OR 'baby':ti,ab,kw OR 'babies':ti,ab,kw) <b>AND</b> ('vertical transmission'/exp OR 'transmit*':ti,ab,kw OR 'transmission*':ti,ab,kw OR 'infection*' OR 'infected')) <b>OR</b> (('human immunodeficiency virus infection'/exp OR 'HIV infection*':ti,ab OR hiv:ti) <b>AND</b> ('infectious pregnancy complications'/exp OR 'vertical transmission'/exp OR (vertical NEAR/3 (transmission OR infection*)):ti,ab,kw OR 'mother to child':ti,ab,kw OR 'parent to child':ti,ab,kw OR MTCT OR PMTCT OR (perinatal* NEAR/3 (transmission OR infection OR acquired)):ti,ab,kw))) <b>AND</b> [english]/lim <b>AND</b> (2018-2024)/py <b>NOT</b> (('animal'/exp OR 'macaque*':ti,ab,kw) <b>NOT</b> ('human'/exp) <b>NOT</b> (('cross-sectional study'/exp OR 'editorial'/exp OR 'letter'/exp OR 'note'/exp OR 'case study'/exp OR 'case study':ti OR 'case report*':ti OR 'cross sectional':ti,ab) <b>NOT</b> ('systematic review'/exp OR 'systematic review (topic)'/exp OR 'meta analysis'/exp OR 'meta analysis (topic)'/exp)) <b>NOT</b> 'conference abstract'/exp</p> |
| <p><b>CINAHL Complete (EBSCO)</b></p> | <p>((((MH "HIV Infections" OR MH "HIV Seropositivity" OR MH "Acquired Immunodeficiency Syndrome" OR MH "Human Immunodeficiency Virus+" OR MH "HIV-Positive Persons+" OR MH "Antiretroviral Therapy, Highly Active" OR MH "Anti-HIV Agents+" OR MH "Anti-Retroviral Agents+" OR TI ("human immunodeficiency virus" OR "human immunodeficiency virus" OR "human immunodeficiency virus" OR "human immune deficiency virus" OR HIV OR HIV1 OR HIV2 OR "acquired immunodeficiency syndrome" OR "acquired immunodeficiency syndrome" OR "acquired immune deficiency syndrome" OR antiretroviral* OR "anti retroviral")) <b>AND</b> (MH "Pregnancy+" OR MH "Childbirth+" OR MH "Pregnancy Complications, Infectious+" OR MH "Expectant Mothers" OR MH "Perinatal Period" OR MH</p>                                                                                                                                                                                                                                                                                                                                                                                                                                                                                                                                                                                                                                                                                                                                                                                                                                                                                                                                                                                                                                                                                                                                                                                                                                                                                                                                                                                                                                                                                                      |

|                                     |                                                                                                                                                                                                                                                                                                                                                                                                                                                                                                                                                                                                                                                                                                                                                                                                                                                                                                                                                                                                                                                                                                                                                                                                                                                                                                                                                                                                                                                                                                                                                                                                                                                                                                                                                                                                                                                                                                                                                                                                                                                                                                                                                                                                                                                                                                                                                                                                                                                                                                   |
|-------------------------------------|---------------------------------------------------------------------------------------------------------------------------------------------------------------------------------------------------------------------------------------------------------------------------------------------------------------------------------------------------------------------------------------------------------------------------------------------------------------------------------------------------------------------------------------------------------------------------------------------------------------------------------------------------------------------------------------------------------------------------------------------------------------------------------------------------------------------------------------------------------------------------------------------------------------------------------------------------------------------------------------------------------------------------------------------------------------------------------------------------------------------------------------------------------------------------------------------------------------------------------------------------------------------------------------------------------------------------------------------------------------------------------------------------------------------------------------------------------------------------------------------------------------------------------------------------------------------------------------------------------------------------------------------------------------------------------------------------------------------------------------------------------------------------------------------------------------------------------------------------------------------------------------------------------------------------------------------------------------------------------------------------------------------------------------------------------------------------------------------------------------------------------------------------------------------------------------------------------------------------------------------------------------------------------------------------------------------------------------------------------------------------------------------------------------------------------------------------------------------------------------------------|
|                                     | <p>"Postnatal Period+" OR MH "Breast Feeding+" OR MH "Disease Transmission, Vertical" OR TI (PMTCT OR MTCT OR "mother to child" OR "parent to child" OR vertical* OR intrauterine OR "intra uterine" OR intrapartum OR "intra partum" OR pregnant OR pregnancy OR prenatal* OR "pre natal*" OR antenatal* OR "ante natal*" OR perinatal* OR "peri natal*" OR puerperium OR postnatal* OR "post natal*" OR postpartum OR "post partum" OR peripartum OR "peri partum" OR "in utero" OR fetomaternal* OR "feto maternal*" OR "maternal fetal" OR fetus* OR foetus* OR fetal* OR foetal* OR neonat* OR breastfeed* OR "breast feeding" OR "breast fed" OR breastmilk OR "breast milk" OR delivery OR birth) OR AB (PMTCT OR MTCT OR "mother to child" OR "parent to child" OR vertical* OR intrauterine OR "intra uterine" OR intrapartum OR "intra partum" OR pregnant OR pregnancy OR prenatal* OR "pre natal*" OR antenatal* OR "ante natal*" OR perinatal* OR "peri natal*" OR puerperium OR postnatal* OR "post natal*" OR postpartum OR "postpartum" OR peripartum OR "peri partum" OR "in utero" OR fetomaternal* OR "feto maternal*" OR "maternal fetal" OR fetus* OR foetus* OR fetal* OR foetal* OR neonat* OR breastfeed* OR "breast feeding" OR "breast fed" OR breastmilk OR "breast milk" OR delivery OR birth)) <b>AND</b> (MH "Infant+" OR MH "Infant, Newborn+" OR MH "Child+" OR TI (infant OR infants OR infancy OR newborn* OR "new born" OR neonat* OR child* OR baby OR babies) OR AB (infant OR infants OR infancy OR newborn* OR "new born" OR neonat* OR child* OR baby OR babies)) <b>AND</b> (MH "Disease Transmission, Vertical" OR TI (transmit* OR transmission* OR infection* OR infected) OR AB (transmit* OR transmission*)) <b>OR</b> ((MH "HIV Infections" OR TI("HIV infection*" OR HIV) OR AB("HIV infection*")) <b>AND</b> (MH "Pregnancy Complications, Infectious+" OR MH "Disease Transmission, Vertical" OR (Vertical N3 (transmission OR infection*)) OR "mother to child" OR "parent to child" OR (perinatal N3 (transmission OR infection*)) OR (perinatally N3 acquired) OR MTCT OR PMTCT))) <b>AND</b> PY 2018-2024 <b>AND</b> LA "English" <b>NOT</b> ((MH "Animals") NOT (MH "Human")) <b>NOT</b> ((MH "Cross Sectional Studies" OR MH "Case Studies" OR TI ("case report" OR "case reports" OR "case series" OR "cross sectional") OR PT (commentary OR editorial OR letter)) NOT PT ("systematic review" OR "meta analysis")) NOT PT abstract</p> |
| <p><b>Global Health (EBSCO)</b></p> | <p>Limit: Publication Year 2018-2024<br/> ((((DE "HIV infections" OR DE "HIV-1 infections" OR DE "HIV-2 infections" OR DE "human immunodeficiency viruses" OR DE "Human immunodeficiency virus 1" OR DE "Human immunodeficiency virus 2" OR DE "acquired immune deficiency syndrome" OR DE "antiretroviral agents" OR DE "reverse transcriptase inhibitors" OR TI ("human immunodeficiency</p>                                                                                                                                                                                                                                                                                                                                                                                                                                                                                                                                                                                                                                                                                                                                                                                                                                                                                                                                                                                                                                                                                                                                                                                                                                                                                                                                                                                                                                                                                                                                                                                                                                                                                                                                                                                                                                                                                                                                                                                                                                                                                                    |

virus" OR "human immunodeficiency virus" OR "human immunodeficiency virus" OR "human immune deficiency virus" OR HIV OR HIV1 OR HIV2 OR "acquired immunodeficiency syndrome" OR "acquired immunodeficiency syndrome" OR "acquired immunodeficiency syndrome" OR "acquired immune deficiency syndrome" OR antiretroviral\* OR "anti retroviral"))

**AND** (DE "pregnancy" OR DE "birth" OR DE "childbirth" OR DE "postpartum period" OR DE "pregnancy complications" OR DE "parturition" OR DE "prenatal period" OR DE "prepartum period" OR DE "puerperium" OR DE "fetus" OR DE "breast feeding" OR DE "human milk" OR DE "vertical transmission" OR DE "maternal transmission" OR TI (PMTCT OR MTCT OR "mother to child" OR "parent to child" OR vertical\* OR intrauterine OR "intra uterine" OR intrapartum OR "intra partum" OR pregnant OR pregnancy OR prenatal\* OR "pre natal\*" OR antenatal\* OR "ante natal\*" OR perinatal\* OR "perinatal\*" OR puerperium OR postnatal\* OR "post natal\*" OR postpartum OR "postpartum" OR peripartum OR "peri partum" OR "in utero" OR fetomaternal\* OR "feto maternal\*" OR "maternal fetal" OR fetus\* OR foetus\* OR fetal\* OR foetal\* OR neonat\* OR breastfeed\* OR "breast feeding" OR "breast fed" OR breastmilk OR "breast milk" OR delivery OR birth) OR AB (PMTCT OR MTCT OR "mother to child" OR "parent to child" OR vertical\* OR intrauterine OR "intra uterine" OR intrapartum OR "intra partum" OR pregnant OR pregnancy OR prenatal\* OR "pre natal\*" OR antenatal\* OR "ante natal\*" OR perinatal\* OR "peri natal\*" OR puerperium OR postnatal\* OR "post natal\*" OR postpartum OR "postpartum" OR peripartum OR "peri partum" OR "in utero" OR fetomaternal\* OR "feto maternal\*" OR "maternal fetal" OR fetus\* OR foetus\* OR fetal\* OR foetal\* OR neonat\* OR breastfeed\* OR "breast feeding" OR "breast fed" OR breastmilk OR "breast milk" OR delivery OR birth)) **AND** (DE "children" OR DE "preschool children" OR DE "school children" OR DE "infants" OR DE "neonates" OR DE "neonates" OR TI (infant OR infants OR infancy OR newborn\* OR "new born" OR neonat\* OR child\* OR baby OR babies) OR AB (infant OR infants OR infancy OR newborn\* OR "new born" OR neonat\* OR child\* OR baby OR babies)) **AND** (DE "vertical transmission" OR DE "maternal transmission" OR TI (transmit\* OR transmission\* OR infection\* OR infected) OR AB (transmit\* OR transmission\*)) **OR** ((DE "HIV infections" OR DE "HIV-1 infections" OR DE "HIV-2 infections" OR TI("HIV infection\*" OR HIV) OR AB("HIV infection\*")) **AND** (DE "vertical transmission" OR DE "maternal transmission" OR (Vertical N3 (transmission OR infection)) OR "mother to child" OR "parent to child" OR (perinatal N3 (transmission OR infection)) OR (perinatally N3 acquired) OR MTCT OR PMTCT)))

**AND** LA "English" **NOT** ((DE "Animals" OR DE "Laboratory

|                                        |                                                                                                                                                                                                                                                                                                                                                                                                                                                                                                                                                                                                                                                                                                                                                                                                                                                                                                                                                                                                                                                                                                                                                                                                                                                                                                                                                                                                                                                                                                                                                                                                                                                                                                                                                                                                                                                                                                                                      |
|----------------------------------------|--------------------------------------------------------------------------------------------------------------------------------------------------------------------------------------------------------------------------------------------------------------------------------------------------------------------------------------------------------------------------------------------------------------------------------------------------------------------------------------------------------------------------------------------------------------------------------------------------------------------------------------------------------------------------------------------------------------------------------------------------------------------------------------------------------------------------------------------------------------------------------------------------------------------------------------------------------------------------------------------------------------------------------------------------------------------------------------------------------------------------------------------------------------------------------------------------------------------------------------------------------------------------------------------------------------------------------------------------------------------------------------------------------------------------------------------------------------------------------------------------------------------------------------------------------------------------------------------------------------------------------------------------------------------------------------------------------------------------------------------------------------------------------------------------------------------------------------------------------------------------------------------------------------------------------------|
|                                        | <p>Animals") NOT DE "Hominidae") <b>NOT</b> ((TI "cross sectional" OR AB "cross sectional" OR ZT "editorial" OR ZT "letter" OR DE "case reports" OR TI "case report" OR TI "case reports" OR TI "case series") NOT (ZU "systematic reviews" OR ZU "meta-analysis"))</p>                                                                                                                                                                                                                                                                                                                                                                                                                                                                                                                                                                                                                                                                                                                                                                                                                                                                                                                                                                                                                                                                                                                                                                                                                                                                                                                                                                                                                                                                                                                                                                                                                                                              |
| <p><b>Cochrane CENTRAL (Wiley)</b></p> | <p>Limit - language: English</p> <p>ID Search Hits</p> <p>#1 MeSH descriptor: [HIV Infections] explode all trees 17667</p> <p>#2 MeSH descriptor: [HIV] explode all trees 4211</p> <p>#3 MeSH descriptor: [Anti-Retroviral Agents] explode all trees 6112</p> <p>#4 MeSH descriptor: [Anti-HIV Agents] explode all trees 5128</p> <p>#5 MeSH descriptor: [Antiretroviral Therapy, Highly Active] explode all trees 1626</p> <p>#6 (HIV NEXT infection*) OR "human immunodeficiency virus" OR HIV OR HIV1 OR HIV2 OR "acquired immunodeficiency syndrome" OR "acquired immunodeficiency syndrome" OR "acquired immune deficiency syndrome" OR "acquired immunodeficiency syndrome" OR antiretroviral* OR "anti retroviral" 34501</p> <p>#7 MeSH descriptor: [Pregnancy] explode all trees 33699</p> <p>#8 MeSH descriptor: [Pregnancy Complications, Infectious] explode all trees 1616</p> <p>#9 MeSH descriptor: [Pregnant Women] explode all trees 988</p> <p>#10 MeSH descriptor: [Delivery, Obstetric) explode all trees 7441</p> <p>#11 MeSH descriptor: [Peripartum Period] explode all trees 47</p> <p>#12 MeSH descriptor: [Postpartum Period) explode all trees 2754</p> <p>#13 MeSH descriptor: [Breast Feeding] explode all trees 2878</p> <p>#14 MeSH descriptor: [Infectious Disease Transmission, Vertical] explode all trees 842</p> <p>#15 PMTCT OR MTCT OR "mother to child" OR "parent to child" OR vertical* OR intrauterine OR "intra uterine" OR intrapartum OR "intra partum" OR pregnant OR pregnancy OR prenatal* OR (pre NEXT natal*) OR antenatal* OR (ante NEXT natal*) OR perinatal* OR (peri NEXT natal*) OR puerperium OR postnatal* OR (post NEXT natal*) OR postpartum OR "post partum" OR peripartum OR "peri partum" OR "in utero" OR fetomaternal* OR</p> |

|                                                                |                                                                                                                                                                                                                                                                                                                                                                                                                                                                                                                                                                                                                                                                                                                                                                                                                                                                                                                                                                                                                                                            |
|----------------------------------------------------------------|------------------------------------------------------------------------------------------------------------------------------------------------------------------------------------------------------------------------------------------------------------------------------------------------------------------------------------------------------------------------------------------------------------------------------------------------------------------------------------------------------------------------------------------------------------------------------------------------------------------------------------------------------------------------------------------------------------------------------------------------------------------------------------------------------------------------------------------------------------------------------------------------------------------------------------------------------------------------------------------------------------------------------------------------------------|
|                                                                | <p>(feto NEXT maternal*) OR "maternal fetal" OR fetus* OR foetus* OR fetal* OR foetal* OR neonat* OR breastfeed* OR "breast feeding" OR "breast fed" OR breastmilk OR "breast milk" OR delivery OR birth 186277<br/> #16 MeSH descriptor: [Infant] explode all trees 45750<br/> #17 MeSH descriptor: [Child) explode all trees 81197<br/> #18 infant OR infants OR infancy OR newborn* OR "new born" OR neonat* OR child* OR baby OR babies 265502<br/> #19 transmit* OR transmission* OR infection* OR infected 167225<br/> #20 (#1 OR #2 OR #3 OR #4 OR #5 OR #6) AND (#7 OR #8 OR #9 OR #10 OR #11 OR #12 OR #13 OR #14 OR #15) AND (#16 OR #17 OR #18) AND (#14 OR #19) 2943<br/> #21 (HIV NEXT infection*) OR HIV 33237<br/> #22 (vertical NEAR/3 transmission) OR "mother to child" OR "parent to child" OR MTCT OR PMTCT OR (perinatal NEAR/3 transmission) OR (perinatal NEAR/3 infection*) OR (perinatally NEAR/3 acquired) 1845<br/> #23 (#1 OR #21) AND #22 1327<br/> #24 #20 OR #23 with Publication Year from 2018 to 2024, in Trials 773</p> |
| <p><b>Global Index Medicus (World Health Organization)</b></p> | <p>(tw:(hiv OR "human immunodeficiency virus"))<br/> AND<br/> (tw:((pregnan* OR childbirth OR breast* OR perinatal* OR prenatal* OR utero OR vertical* OR "mother to child")))<br/> AND<br/> (tw:(transmit* OR transmission))<br/> AND<br/> La:("en")<br/> AND<br/> Year_cluster:[2018 to 2024]</p>                                                                                                                                                                                                                                                                                                                                                                                                                                                                                                                                                                                                                                                                                                                                                        |



## S2.4. Variables extracted in systematic review

The following variables were extracted from all included studies:

### *Study details:*

- Author name(s)
- Study title
- Journal
- Publication year
- Geographic region(s) covered (i.e. country or countries)
- Dates of data collection
- Study population(s)
- Total population size

### *Vertical transmission details:*

- Total N of pregnant women or breastfeeding mothers living with HIV
- Total N of infants born to mothers living with HIV, who were tested for HIV
- N of infants who tested HIV-positive
- Events of vertical HIV transmission
- Timing of transmission (perinatal or during breastfeeding)
- Age of child at testing
- Maternal prophylaxis

### *When available:*

- Maternal ART regimens
- Timing of maternal ART initiation
- Infant treatment and prophylaxis
- Maternal viral load or viral suppression information
  - a. Timing of viral load test
  - b. In viral load suppression, threshold for viral load suppression
- Maternal CD4 count information at baseline
- Infant feeding patterns (breastfed or formula fed, including duration in months)

## S2.5. Perinatal transmission probability definition

Perinatal transmission was defined as transmission that occurs before six weeks (1.5 months) after birth. We included studies with both breastfeeding and formula-feeding populations. To model perinatal VT probability, we extracted the number of infections identified before six weeks postpartum and the number of HIV exposed infants.

$$PVT = \frac{HPI_{1.5\ months}}{HEI}$$

Equation S2.2

Perinatal VT (*PVT*) probability was then calculated as the ratio of HIV positive infants (*HPI<sub>1.5 months</sub>*) to HIV exposed infants (*HEI*) as shown in Equation S2.2.

## S2.6. Monthly breastfeeding transmission probability definition

Breastfeeding transmission was calculated as a monthly transmission probability and considered any vertical transmission that occurred in breastfeeding populations for infants after six weeks of age. The monthly breastfeeding transmission probability (*BFVT*) was then calculated according to Equation S2.3.

$$BFVT = \frac{HPI_{BF_{End}} - HPI_{1.5\ months}}{(HEI - HPI_{1.5\ months}) * (BF_{End} - 1.5)}$$

Equation S2.3

The numerator represents the number of infections that occurred between the end of breastfeeding and the end of the perinatal period as the difference between the number of HIV positive infants at the end of breastfeeding (*HPI<sub>BF<sub>End</sub></sub>*) and at 1.5 months (*HPI<sub>1.5 months</sub>*). The denominator represents the number of HIV exposed (*HEI*) but uninfected infants during this period (minus *HPI<sub>1.5 months</sub>*) and the number of months between the perinatal period (1.5) and the end of breastfeeding (*BF<sub>End</sub>*).

### S3. Data used in meta-regression analysis

This section outlines the data used across the four meta-regression analyses and viral load suppression at delivery analysis. First, we present a table with study characteristics, and then for each model we provide full citations of the studies used in each model.

**Table S3.** Study characteristics of studies included in models one through four

| ID | Study             | Study years  | Location                                 | Maternal PMTCT regimen or infection type | HIV exposed infants | Transmission timing | Model 1: No PMTCT | Model 2: Maternal seroconversion and short course PMTCT | Model 3: Perinatal transmission from women on ART | Model 4: Breastfeeding transmission from women on ART | Viral suppression at delivery model | Added in 2024 systematic review |    |
|----|-------------------|--------------|------------------------------------------|------------------------------------------|---------------------|---------------------|-------------------|---------------------------------------------------------|---------------------------------------------------|-------------------------------------------------------|-------------------------------------|---------------------------------|----|
| 1  | Aebi-Popp, 2022   | 2019-2021    | Switzerland                              | On ART                                   | 21                  | Perinatal           |                   |                                                         | Yes                                               |                                                       |                                     | Yes                             |    |
|    |                   |              |                                          |                                          | 21                  | Breastfeeding       |                   |                                                         |                                                   | Yes                                                   |                                     |                                 |    |
| 2  | Amone, 2023       | 2016-2017    | Uganda                                   | Started ART                              | 431                 | Perinatal           |                   |                                                         | Yes                                               |                                                       |                                     | No                              |    |
| 3  | Bailey, 2011      | 2000-2009    | Europe                                   | Started ART                              | 1,760               | Perinatal           |                   |                                                         | Yes                                               |                                                       |                                     | No                              |    |
| 4  | Birkhead, 2010    | 2002-2006    | United States                            | Infection                                | 41                  | Perinatal           |                   | Yes                                                     |                                                   |                                                       |                                     | No                              |    |
| 5  | Black, 2008       | 2004-2007    | South Africa                             | Started ART                              | 302                 | Perinatal           |                   |                                                         | Yes                                               |                                                       |                                     | No                              |    |
| 6  | Blonk, 2015       | 2010-2014    | Europe                                   | On ART                                   | 7                   | Perinatal           |                   |                                                         | Yes                                               |                                                       | Yes                                 | No                              |    |
| 7  | Bornhede, 2018    | 2014-2017    | Sweden                                   | Started ART                              | 3                   | Perinatal           |                   |                                                         | Yes                                               |                                                       | Yes                                 | No                              |    |
|    |                   |              |                                          | On ART                                   | 10                  |                     |                   |                                                         | Yes                                               | Yes                                                   |                                     |                                 |    |
| 8  | Carey, 2018       | 2008-2014    | United Kingdom                           | Started ART                              | 67                  | Perinatal           |                   |                                                         | Yes                                               |                                                       |                                     | No                              |    |
|    |                   |              |                                          | On ART                                   | 65                  |                     |                   |                                                         | Yes                                               |                                                       |                                     |                                 |    |
| 9  | Chasela, 2010     | 2006-2008    | Malawi                                   | Existing                                 | 668                 | Breastfeeding       | Yes               |                                                         |                                                   |                                                       |                                     | No                              |    |
|    |                   |              | Option A                                 | 748                                      |                     |                     | Yes               |                                                         |                                                   |                                                       |                                     |                                 |    |
| 10 | Chauhan, 2021     | 2016-2018    | India                                    | On ART                                   | 32                  | Perinatal           |                   |                                                         | Yes                                               |                                                       |                                     | Yes                             |    |
| 11 | Chen, 2019        | 2007-2015    | China                                    | Started ART                              | 446                 | Perinatal           |                   |                                                         | Yes                                               |                                                       |                                     | Yes                             |    |
| 12 | Chibwasha, 2011   | 2007-2010    | Zambia                                   | Option B                                 | 250                 | Perinatal           |                   | Yes                                                     |                                                   |                                                       |                                     | No                              |    |
|    |                   |              |                                          | Started ART                              | 1,813               |                     |                   |                                                         | Yes                                               |                                                       |                                     |                                 |    |
| 13 | Choi, 2018        | 2005-2017    | Korea                                    | Started ART                              | 8                   | Perinatal           |                   |                                                         | Yes                                               |                                                       | Yes                                 | No                              |    |
|    |                   |              |                                          | On ART                                   | 8                   |                     |                   |                                                         | Yes                                               | Yes                                                   |                                     |                                 |    |
| 14 | Coetzee, 2019     | 2010         | South Africa                             | Existing                                 | 15                  | Perinatal           | Yes               |                                                         |                                                   |                                                       |                                     | Yes                             |    |
|    |                   |              |                                          | Dual ARV                                 | 8                   |                     |                   | Yes                                                     |                                                   |                                                       |                                     |                                 |    |
|    |                   |              |                                          | Started ART                              | 44                  |                     |                   |                                                         | Yes                                               |                                                       |                                     |                                 |    |
|    |                   |              |                                          | On ART                                   | 25                  |                     |                   |                                                         | Yes                                               |                                                       |                                     |                                 |    |
| 15 | Cohan, 2015       | 2009-2013    | Uganda                                   | Option B                                 | 353                 | Breastfeeding       |                   | Yes                                                     |                                                   |                                                       |                                     | No                              |    |
|    |                   |              |                                          | Option B                                 | 374                 | Perinatal           |                   | Yes                                                     |                                                   |                                                       | No                                  |                                 |    |
|    |                   |              |                                          | Started ART                              | 353                 | Breastfeeding       |                   |                                                         |                                                   | Yes                                                   | No                                  |                                 |    |
|    |                   |              |                                          | Started ART                              | 389                 | Perinatal           |                   |                                                         | Yes                                               |                                                       | No                                  |                                 |    |
| 16 | Colbers, 2015     | Not reported | Europe                                   | On ART                                   | 18                  | Perinatal           |                   |                                                         | Yes                                               |                                                       | Yes                                 | No                              |    |
| 17 | Colbers, 2015     | Not reported | Europe                                   | On ART                                   | 11                  | Perinatal           |                   |                                                         | Yes                                               |                                                       |                                     | No                              |    |
| 18 | Colebunders, 1988 | 1986         | Democratic Republic of the Congo         | Infection                                | 3                   | Breastfeeding       |                   | Yes                                                     |                                                   |                                                       |                                     | No                              |    |
| 19 | Connor, 1994      | 1991-1993    | United States, France                    | Existing                                 | 183                 | Breastfeeding       | Yes               |                                                         |                                                   |                                                       |                                     | No                              |    |
| 20 | Coovadia, 2013    | 2008-2011    | South Africa, Tanzania, Uganda, Zimbabwe | Existing                                 | 434                 | Breastfeeding       | Yes               |                                                         |                                                   |                                                       |                                     |                                 | No |
|    |                   |              |                                          | Dual ARV                                 | 819                 |                     |                   | Yes                                                     |                                                   |                                                       |                                     |                                 |    |
|    |                   |              |                                          | Option A                                 | 418                 |                     |                   | Yes                                                     |                                                   |                                                       |                                     |                                 |    |
|    |                   |              |                                          | Single dose Nevirapine, CD4 >350         | 434                 |                     |                   | Yes                                                     |                                                   |                                                       |                                     |                                 |    |

| ID | Study                     | Study years  | Location                                                        | Maternal PMTCT regimen or infection type | HIV exposed infants | Transmission timing | Model 1: No PMTCT | Model 2: Maternal seroconversion and short course PMTCT | Model 3: Perinatal transmission from women on ART | Model 4: Breastfeeding transmission from women on ART | Viral suppression at delivery model | Added in 2024 systematic review |
|----|---------------------------|--------------|-----------------------------------------------------------------|------------------------------------------|---------------------|---------------------|-------------------|---------------------------------------------------------|---------------------------------------------------|-------------------------------------------------------|-------------------------------------|---------------------------------|
|    |                           |              |                                                                 | Single dose Nevirapine, CD4 <350         | 54                  |                     |                   | Yes                                                     |                                                   |                                                       |                                     |                                 |
| 21 | Dabis, 1999               | 1995-1998    | Ivory Coast, Burkina Faso                                       | Existing                                 | 113                 | Breastfeeding       | Yes               |                                                         |                                                   |                                                       |                                     | No                              |
|    |                           |              |                                                                 |                                          | 145                 | Perinatal           | Yes               |                                                         |                                                   |                                                       |                                     |                                 |
| 22 | De Schacht, 2014          | 2008-2011    | Mozambique                                                      | Infection                                | 29                  | Breastfeeding       |                   | Yes                                                     |                                                   |                                                       |                                     | No                              |
| 23 | Delicio, 2011             | 2000-2009    | Brazil                                                          | Started ART                              | 12                  | Perinatal           |                   |                                                         | Yes                                               |                                                       |                                     | No                              |
| 24 | Dinh, 2015                | 2011-2012    | South Africa                                                    | Infection                                | 212                 | Perinatal           |                   | Yes                                                     |                                                   |                                                       |                                     | No                              |
| 25 | Dinh, 2018                | 2013         | Zimbabwe                                                        | Option B                                 | 338                 | Perinatal           |                   | Yes                                                     |                                                   |                                                       |                                     | No                              |
|    |                           |              |                                                                 | On ART                                   | 415                 |                     |                   |                                                         | Yes                                               |                                                       |                                     |                                 |
| 26 | Dryden-Peterson, 2011     | 2009-2010    | Botswana                                                        | Option A                                 | 170                 | Perinatal           |                   | Yes                                                     |                                                   |                                                       |                                     | No                              |
|    |                           |              |                                                                 | Started ART                              | 114                 |                     |                   |                                                         | Yes                                               |                                                       |                                     |                                 |
|    |                           |              |                                                                 | On ART                                   | 144                 |                     |                   |                                                         | Yes                                               |                                                       |                                     |                                 |
| 27 | Ejikulie, 2019            | 2015-2016    | Nigeria                                                         | Infection                                | 5                   | Perinatal           |                   | Yes                                                     |                                                   |                                                       |                                     | Yes                             |
| 28 | Ekpini, 1997              | 1990-1994    | Ivory Coast                                                     | Infection                                | 12                  | Breastfeeding       |                   | Yes                                                     |                                                   |                                                       |                                     | No                              |
| 29 | Embree, 2000              | 1986-1997    | Kenya                                                           | Infection                                | 12                  | Breastfeeding       |                   | Yes                                                     |                                                   |                                                       |                                     | No                              |
| 30 | Ewenighi-Amankwah, 2020   | Not reported | Nigeria                                                         | On ART                                   | 122                 | Perinatal           |                   |                                                         | Yes                                               |                                                       |                                     | Yes                             |
| 31 | Finocchario-Kessler, 2015 | 2010-2012    | Kenya                                                           | Dual ARV                                 | 904                 | Perinatal           |                   | Yes                                                     |                                                   |                                                       |                                     | No                              |
|    |                           |              |                                                                 | Option A                                 | 904                 |                     |                   | Yes                                                     |                                                   |                                                       |                                     |                                 |
|    |                           |              |                                                                 | Option B                                 | 219                 |                     |                   | Yes                                                     |                                                   |                                                       |                                     |                                 |
| 32 | Flynn, 2018               | 2011-2014    | Malawi, South Africa, Zimbabwe, Uganda, Zambia, Tanzania, India | Dual ARV                                 | 503                 | Breastfeeding       |                   | Yes                                                     |                                                   |                                                       |                                     | No                              |
|    |                           |              |                                                                 | Option A                                 | 503                 |                     |                   | Yes                                                     |                                                   |                                                       |                                     |                                 |
|    |                           |              |                                                                 | Option B                                 | 648                 |                     |                   | Yes                                                     |                                                   |                                                       |                                     |                                 |
| 33 | Frange, 2020              | 2010-2018    | France                                                          | On ART                                   | 247                 | Perinatal           |                   |                                                         | Yes                                               | Yes                                                   | Yes                                 |                                 |
| 34 | Ganter, 2019              | 2008-2014    | France                                                          | Started ART                              | 16                  | Perinatal           |                   | Yes                                                     |                                                   |                                                       |                                     | Yes                             |
|    |                           |              |                                                                 | On ART                                   | 78                  |                     |                   | Yes                                                     |                                                   |                                                       |                                     |                                 |
| 35 | Gibb, 2012                | 2003-2009    | Uganda, Zimbabwe                                                | On ART                                   | 172                 | Perinatal           |                   | Yes                                                     |                                                   |                                                       |                                     | No                              |
|    |                           |              |                                                                 |                                          | 172                 | Breastfeeding       |                   |                                                         | Yes                                               |                                                       |                                     |                                 |
| 36 | Gill, 2017                | 2013-2014    | Rwanda                                                          | Option B                                 | 381                 | Breastfeeding       |                   | Yes                                                     |                                                   |                                                       |                                     | No                              |
|    |                           |              |                                                                 | Started ART                              | 205                 |                     |                   |                                                         | Yes                                               |                                                       |                                     |                                 |
|    |                           |              |                                                                 | On ART                                   | 381                 |                     |                   |                                                         | Yes                                               |                                                       |                                     |                                 |
|    |                           |              |                                                                 | Option B                                 | 205                 | Perinatal           |                   | Yes                                                     |                                                   |                                                       |                                     |                                 |
|    |                           |              |                                                                 | Started ART                              | 205                 |                     |                   |                                                         | Yes                                               |                                                       |                                     |                                 |
|    |                           |              |                                                                 | On ART                                   | 381                 |                     |                   |                                                         | Yes                                               |                                                       |                                     |                                 |
| 37 | Giuliano, 2014            | 2008-2009    | Malawi                                                          | Option B                                 | 276                 | Breastfeeding       |                   | Yes                                                     |                                                   |                                                       |                                     | No                              |
|    |                           |              |                                                                 | Started ART                              | 276                 |                     |                   |                                                         | Yes                                               |                                                       |                                     |                                 |
|    |                           |              |                                                                 | Option B                                 | 278                 | Perinatal           |                   | Yes                                                     |                                                   |                                                       |                                     |                                 |
|    |                           |              |                                                                 | Started ART                              | 278                 |                     |                   |                                                         | Yes                                               |                                                       |                                     |                                 |
| 38 | Goga, 2015                | 2010         | South Africa                                                    | Dual ARV                                 | 1532                | Perinatal           |                   | Yes                                                     |                                                   |                                                       |                                     | No                              |
|    |                           |              |                                                                 | Option A                                 | 1532                |                     |                   | Yes                                                     |                                                   |                                                       |                                     |                                 |

| ID | Study            | Study years  | Location                                                           | Maternal PMTCT regimen or infection type | HIV exposed infants | Transmission timing | Model 1: No PMTCT | Model 2: Maternal seroconversion and short course PMTCT | Model 3: Perinatal transmission from women on ART | Model 4: Breastfeeding transmission from women on ART | Viral suppression at delivery model | Added in 2024 systematic review |
|----|------------------|--------------|--------------------------------------------------------------------|------------------------------------------|---------------------|---------------------|-------------------|---------------------------------------------------------|---------------------------------------------------|-------------------------------------------------------|-------------------------------------|---------------------------------|
| 39 | Goga, 2016       | 2011-2013    | South Africa                                                       | Dual ARV                                 | 2113                | Perinatal           | Yes               | Yes                                                     |                                                   |                                                       |                                     | No                              |
|    |                  |              |                                                                    | Existing                                 | 63                  |                     |                   |                                                         |                                                   |                                                       |                                     |                                 |
|    |                  |              |                                                                    | Option A                                 | 2113                |                     |                   | Yes                                                     |                                                   |                                                       |                                     |                                 |
|    |                  |              |                                                                    | Option B                                 | 890                 |                     |                   | Yes                                                     |                                                   |                                                       |                                     |                                 |
|    |                  |              |                                                                    | Started ART                              | 890                 |                     |                   | Yes                                                     |                                                   |                                                       |                                     |                                 |
| 40 | Goga, 2020       | 2012-2014    | South Africa                                                       | On ART                                   | 635                 | Perinatal           |                   |                                                         | Yes                                               |                                                       |                                     | Yes                             |
| 41 | Guay, 1999       | 1997-1999    | Uganda                                                             | Single dose Nevirapine                   | 310                 | Perinatal           |                   | Yes                                                     |                                                   |                                                       |                                     | No                              |
| 42 | Habib, 2021      | 2015-2017    | Iran                                                               | Existing                                 | 20                  | Perinatal           | Yes               |                                                         |                                                   |                                                       |                                     | Yes                             |
| 43 | Harrington, 2019 | 2015-2016    | Malawi                                                             | Started ART                              | 264                 | Perinatal           |                   |                                                         | Yes                                               |                                                       |                                     | Yes                             |
| 44 | Hira, 1990       | 1985-1986    | Zambia                                                             | Infection                                | 19                  | Breastfeeding       |                   | Yes                                                     |                                                   |                                                       |                                     | No                              |
| 45 | Hoffman, 2010    | 2004-2008    | South Africa                                                       | Existing                                 | 23                  | Perinatal           | Yes               |                                                         |                                                   |                                                       |                                     | No                              |
|    |                  |              |                                                                    | Single dose Nevirapine                   | 1534                |                     |                   | Yes                                                     |                                                   |                                                       |                                     |                                 |
|    |                  |              |                                                                    | Started ART                              | 730                 |                     |                   |                                                         | Yes                                               |                                                       |                                     |                                 |
|    |                  |              |                                                                    | On ART                                   | 143                 |                     |                   |                                                         | Yes                                               |                                                       |                                     |                                 |
| 46 | Humphrey, 2010   | 1997-2000    | Zimbabwe                                                           | Infection                                | 334                 | Breastfeeding       |                   | Yes                                                     |                                                   |                                                       |                                     | No                              |
| 47 | Huntington, 2011 | 1996-2009    | United Kingdom                                                     | On ART                                   | 340                 | Perinatal           |                   |                                                         | Yes                                               |                                                       |                                     | No                              |
| 48 | Iliff, 2005      | 1997-2000    | Zimbabwe                                                           | Existing                                 | 4367                | Perinatal           | Yes               |                                                         |                                                   |                                                       |                                     | No                              |
| 49 | João, 2012       | 2013-2018    | Argentina, Brazil, South Africa, Tanzania, Thailand, United States | Started ART                              | 307                 | Perinatal           |                   |                                                         | Yes                                               |                                                       |                                     | Yes                             |
| 50 | Kesho Bora, 2010 | 2005-2008    | Burkina Faso, Kenya, South Africa                                  | Option B                                 | 154                 | Breastfeeding       |                   | Yes                                                     |                                                   |                                                       |                                     | No                              |
|    |                  |              |                                                                    | Single dose Nevirapine, CD4 >350         | 283                 |                     |                   | Yes                                                     |                                                   |                                                       |                                     |                                 |
|    |                  |              |                                                                    | Single dose Nevirapine, CD4 <350         | 184                 |                     |                   | Yes                                                     |                                                   |                                                       |                                     |                                 |
| 51 | Kesho Bora, 2011 | 2005-2008    | Burkina Faso, Kenya, South Africa                                  | Option A                                 | 284                 | Perinatal           |                   | Yes                                                     |                                                   |                                                       |                                     | No                              |
|    |                  |              |                                                                    | Option B                                 | 333                 | Breastfeeding       |                   | Yes                                                     |                                                   |                                                       |                                     |                                 |
|    |                  |              |                                                                    | Option B                                 | 166                 | Perinatal           |                   | Yes                                                     |                                                   |                                                       |                                     |                                 |
| 52 | Kilweo, 2009     | 2004-2006    | Tanzania                                                           | Option B                                 | 441                 | Breastfeeding       |                   | Yes                                                     |                                                   |                                                       |                                     | No                              |
|    |                  |              |                                                                    | Started ART                              | 423                 |                     |                   | Yes                                                     |                                                   |                                                       |                                     |                                 |
|    |                  |              |                                                                    | Option B                                 | 364                 | Perinatal           |                   | Yes                                                     |                                                   |                                                       |                                     |                                 |
| 53 | Kim, 2013        | 2009-2011    | Malawi                                                             | On ART                                   | 262                 | Perinatal           |                   |                                                         | Yes                                               |                                                       |                                     | No                              |
|    |                  |              |                                                                    |                                          | 262                 | Breastfeeding       |                   |                                                         | Yes                                               |                                                       |                                     |                                 |
| 54 | Kuhn, 2010       | Not reported | Zambia                                                             | Existing                                 | 993                 | Breastfeeding       | Yes               |                                                         |                                                   |                                                       |                                     | No                              |
| 55 | Lallemant, 2004  | 2001-2003    | Thailand                                                           | Dual ARV                                 | 636                 | Perinatal           |                   | Yes                                                     |                                                   |                                                       |                                     | No                              |
|    |                  |              |                                                                    | Option A                                 | 508                 |                     |                   | Yes                                                     |                                                   |                                                       |                                     |                                 |

| ID | Study               | Study years  | Location             | Maternal PMTCT regimen or infection type | HIV exposed infants | Transmission timing | Model 1: No PMTCT | Model 2: Maternal seroconversion and short course PMTCT | Model 3: Perinatal transmission from women on ART | Model 4: Breastfeeding transmission from women on ART | Viral suppression at delivery model | Added in 2024 systematic review |     |
|----|---------------------|--------------|----------------------|------------------------------------------|---------------------|---------------------|-------------------|---------------------------------------------------------|---------------------------------------------------|-------------------------------------------------------|-------------------------------------|---------------------------------|-----|
| 56 | Le Roux, 2019       | Not reported | South Africa         | Infection                                | 7                   | Breastfeeding       |                   | Yes                                                     |                                                   |                                                       |                                     | Yes                             |     |
| 57 | Liang, 2009         | 2007         | China                | Infection                                | 106                 | Perinatal           |                   | Yes                                                     |                                                   |                                                       |                                     | No                              |     |
| 58 | Lima, 2016          | 2008-2013    | Brazil               | Infection                                | 9                   | Breastfeeding       |                   | Yes                                                     |                                                   |                                                       |                                     | No                              |     |
| 59 | Loh, 2021           | 2008-2015    | Singapore            | Started ART                              | 42                  | Perinatal           |                   |                                                         | Yes                                               |                                                       |                                     | Yes                             |     |
|    |                     |              |                      | On ART                                   | 46                  |                     |                   |                                                         | Yes                                               |                                                       |                                     |                                 |     |
| 60 | Malaba, 2022        | 2018         | South Africa, Uganda | Started ART                              | 268                 | Perinatal           |                   |                                                         | Yes                                               |                                                       |                                     | Yes                             |     |
|    |                     |              |                      |                                          | 268                 |                     |                   |                                                         | Breastfeeding                                     |                                                       |                                     |                                 | Yes |
| 61 | Mandelbrot, 2015    | 2000-2011    | France               | Started ART                              | 4267                | Perinatal           |                   |                                                         | Yes                                               |                                                       | Yes                                 | No                              |     |
|    |                     |              |                      | On ART                                   | 3505                |                     |                   |                                                         | Yes                                               |                                                       | Yes                                 |                                 |     |
| 62 | Marazzi, 2010       | 2005-2009    | Malawi, Mozambique   | Option B                                 | 2528                | Breastfeeding       |                   |                                                         | Yes                                               |                                                       | Yes                                 | No                              |     |
|    |                     |              |                      | Started ART                              | 2926                |                     |                   |                                                         | Perinatal                                         |                                                       |                                     |                                 | Yes |
|    |                     |              |                      | Option B                                 | 3081                |                     |                   |                                                         |                                                   |                                                       |                                     |                                 |     |
|    |                     |              |                      | Started ART                              | 3081                |                     |                   | Yes                                                     |                                                   |                                                       |                                     |                                 |     |
| 63 | Marinda, 2011       | 1997-2000    | Zimbabwe             | Existing Infection                       | 3285<br>422         | Perinatal           | Yes               | Yes                                                     |                                                   |                                                       |                                     | No                              |     |
| 64 | Martinson, 2007     | 2003-2005    | South Africa         | Single dose Nevirapine                   | 108                 | Perinatal           |                   | Yes                                                     |                                                   |                                                       |                                     | No                              |     |
| 65 | Mayaux, 1995        | 1986-1994    | France               | Existing                                 | 236                 | Perinatal           | Yes               |                                                         |                                                   |                                                       |                                     | No                              |     |
| 66 | Meggi, 2018         | 2014-2016    | Mozambique           | Option A                                 | 6                   | Perinatal           |                   | Yes                                                     |                                                   |                                                       |                                     | Yes                             |     |
| 67 | Meyers, 2015        | 2010-2013    | China                | Started ART                              | 1994                | Perinatal           |                   |                                                         | Yes                                               |                                                       |                                     | No                              |     |
| 68 | Moodley, 2003       | 1999-2000    | South Africa         | Single dose Nevirapine                   | 663                 | Perinatal           |                   | Yes                                                     |                                                   |                                                       |                                     | No                              |     |
| 69 | Myer, 2017          | 2013-2014    | South Africa         | Option B                                 | 555                 | Perinatal           |                   |                                                         | Yes                                               |                                                       | Yes                                 | No                              |     |
|    |                     |              |                      | Started ART                              | 555                 |                     |                   |                                                         | Yes                                               |                                                       |                                     |                                 |     |
| 70 | Namukwaya, 2011     | 2007-2009    | Uganda               | Dual ARV                                 | 1161                | Perinatal           |                   |                                                         | Yes                                               |                                                       |                                     | No                              |     |
|    |                     |              |                      | Option A                                 | 1161                |                     |                   |                                                         | Yes                                               |                                                       |                                     |                                 |     |
|    |                     |              |                      | Single dose Nevirapine                   | 367                 |                     |                   |                                                         | Yes                                               |                                                       |                                     |                                 |     |
| 71 | Ndarukwa, 2019      | 2014-2016    | Zimbabwe             | Started ART                              | 841                 | Perinatal           |                   |                                                         | Yes                                               |                                                       |                                     | Yes                             |     |
| 72 | Nduati, 2000        | 1992-1997    | Kenya                | On ART                                   | 289                 | Breastfeeding       | Yes               |                                                         | Yes                                               |                                                       |                                     | No                              |     |
| 73 | Nesheim, 2007       | 2001-2005    | United States        | Infection                                | 4                   | Perinatal           |                   | Yes                                                     |                                                   |                                                       |                                     | No                              |     |
| 74 | Ngoma, 2015         | 2008-2009    | Zambia               | Option B                                 | 219                 | Perinatal           |                   |                                                         | Yes                                               |                                                       |                                     | No                              |     |
|    |                     |              |                      | Started ART                              | 219                 |                     |                   |                                                         | Yes                                               |                                                       |                                     |                                 |     |
| 75 | Nlend, 2013         | 2008-2012    | Cameroon             | Option A                                 | 110                 | Perinatal           |                   |                                                         | Yes                                               |                                                       |                                     | No                              |     |
|    |                     |              |                      | Started ART                              | 285                 |                     |                   |                                                         | Yes                                               |                                                       |                                     |                                 |     |
| 76 | Nyandiko, 2010      | 2002-2007    | Kenya                | Single dose Nevirapine                   | 69                  | Perinatal           |                   | Yes                                                     |                                                   |                                                       |                                     | No                              |     |
| 77 | Olana, 2016         | 2006-2014    | Ethiopia             | Existing                                 | 102                 | Perinatal           |                   | Yes                                                     |                                                   |                                                       |                                     | No                              |     |
|    |                     |              |                      | Dual ARV                                 | 50                  |                     |                   |                                                         | Yes                                               |                                                       |                                     |                                 |     |
|    |                     |              |                      | Option A                                 | 50                  |                     |                   |                                                         | Yes                                               |                                                       |                                     |                                 |     |
| 78 | Ørbæk, 2017         | 2002-2014    | Denmark              | On ART                                   | 247                 | Perinatal           |                   |                                                         | Yes                                               |                                                       |                                     | No                              |     |
| 79 | Palasanthiran, 1993 | 1980-1989    | Australia            | Infection                                | 11                  | Breastfeeding       |                   | Yes                                                     |                                                   |                                                       |                                     | No                              |     |

| ID | Study                  | Study years  | Location                       | Maternal PMTCT regimen or infection type | HIV exposed infants | Transmission timing | Model 1: No PMTCT | Model 2: Maternal seroconversion and short course PMTCT | Model 3: Perinatal transmission from women on ART | Model 4: Breastfeeding transmission from women on ART | Viral suppression at delivery model | Added in 2024 systematic review |
|----|------------------------|--------------|--------------------------------|------------------------------------------|---------------------|---------------------|-------------------|---------------------------------------------------------|---------------------------------------------------|-------------------------------------------------------|-------------------------------------|---------------------------------|
| 80 | Pellowski, 2019        | 2012-2015    | South African                  | Option A                                 | 239                 | Perinatal           |                   | Yes                                                     |                                                   |                                                       |                                     | Yes                             |
| 81 | Peltier, 2009          | 2005-2007    | Rwanda                         | Option B                                 | 532                 | Perinatal           |                   | Yes                                                     |                                                   |                                                       |                                     | No                              |
|    |                        |              |                                | Started ART                              | 227                 | Breastfeeding       |                   |                                                         | Yes                                               |                                                       |                                     |                                 |
| 82 | Perry, 2016            | 2007-2012    | United Kingdom                 | On ART                                   | 178                 | Perinatal           |                   |                                                         | Yes                                               |                                                       |                                     | No                              |
|    |                        |              | Started ART                    | 493                                      |                     |                     |                   | Yes                                                     |                                                   |                                                       |                                     |                                 |
| 83 | Peters, 2017           | 2012-2014    | United Kingdom                 | On ART                                   | 1749                | Perinatal           |                   |                                                         | Yes                                               |                                                       |                                     | No                              |
| 84 | PETRA Study Team, 2002 | 1996-2000    | Tanzania, South Africa, Uganda | Existing                                 | 303                 | Perinatal           | Yes               |                                                         |                                                   |                                                       |                                     | No                              |
|    |                        |              |                                |                                          | 303                 | Breastfeeding       | Yes               |                                                         |                                                   |                                                       |                                     |                                 |
| 85 | Prieto, 2012           | 2000-2007    | Spain                          | Existing                                 | 68                  | Perinatal           | Yes               |                                                         |                                                   |                                                       |                                     | No                              |
|    |                        |              | Started ART                    | 244                                      |                     |                     |                   | Yes                                                     |                                                   |                                                       |                                     |                                 |
| 86 | Rollins, 2007          | 2004-2005    | South Africa                   | Infection                                | 172                 | Perinatal           |                   | Yes                                                     |                                                   |                                                       |                                     | No                              |
| 87 | Roongpisuthipong, 2001 | 1992-1994    | Thailand                       | Infection                                | 15                  | Perinatal           |                   | Yes                                                     |                                                   |                                                       |                                     | No                              |
| 88 | Sagna, 2015            | 2009-2013    | Burkina Faso                   | Option A                                 | 136                 | Perinatal           |                   |                                                         | Yes                                               |                                                       |                                     | No                              |
| 89 | Salazar-Austin, 2018   | 2011-2014    | South Africa                   | Dual ARV                                 | 48                  | Perinatal           |                   |                                                         | Yes                                               |                                                       |                                     | No                              |
|    |                        |              |                                | Option A                                 | 48                  |                     |                   |                                                         | Yes                                               |                                                       |                                     |                                 |
|    |                        |              |                                | Option B                                 | 150                 | Breastfeeding       |                   |                                                         | Yes                                               |                                                       |                                     |                                 |
|    |                        |              |                                | Option B                                 | 171                 |                     |                   |                                                         | Yes                                               |                                                       |                                     |                                 |
| 90 | Samuel, 2014           | 2004-2010    | United Kingdom                 | On ART                                   | 68                  | Perinatal           |                   |                                                         | Yes                                               | Yes                                                   | No                                  |                                 |
| 91 | Schalkwijk, 2017       | Not reported | Europe                         | On ART                                   | 15                  | Perinatal           |                   |                                                         | Yes                                               | Yes                                                   | No                                  |                                 |
| 92 | Scott, 2017            | 2002-2009    | United States                  | Started ART                              | 44                  | Perinatal           |                   |                                                         | Yes                                               |                                                       | No                                  |                                 |
| 93 | Shaffer, 1999          | 1996-1997    | Thailand                       | Existing                                 | 195                 | Perinatal           | Yes               |                                                         |                                                   |                                                       |                                     | No                              |
| 94 | Shapiro, 2006          | 2005-2006    | Botswana                       | Dual ARV                                 | 345                 | Perinatal           |                   | Yes                                                     |                                                   |                                                       |                                     | No                              |
|    |                        |              |                                | Option A                                 | 345                 |                     |                   | Yes                                                     |                                                   |                                                       |                                     |                                 |
| 95 | Shapiro, 2010          | 2006-2008    | Botswana                       | Option B                                 | 553                 | Perinatal           |                   | Yes                                                     |                                                   |                                                       |                                     | No                              |
|    |                        |              |                                | Option B                                 | 703                 | Breastfeeding       |                   | Yes                                                     |                                                   |                                                       |                                     |                                 |
|    |                        |              |                                | Started ART                              | 480                 |                     |                   |                                                         | Yes                                               |                                                       |                                     |                                 |
| 96 | Sibiude, 2023          | 2000-2017    | France                         | Started ART                              | 7448                | Perinatal           |                   |                                                         | Yes                                               |                                                       | Yes                                 | No                              |
|    |                        |              |                                | On ART                                   | 6606                |                     |                   | Yes                                                     | Yes                                               |                                                       |                                     |                                 |
| 97 | SWEN Study Team, 2008  | 2001-2007    | Ethiopia, Uganda, India        | Single dose Nevirapine                   | 986                 | Perinatal           |                   | Yes                                                     |                                                   |                                                       |                                     | No                              |
| 98 | Thomas, 2011           | 2003-2009    | Kenya                          | Option B                                 | 487                 | Perinatal           |                   | Yes                                                     |                                                   |                                                       |                                     | No                              |
|    |                        |              |                                | Started ART                              | 487                 |                     |                   | Yes                                                     | Yes                                               |                                                       |                                     |                                 |
|    |                        |              |                                | Option B                                 | 522                 | Breastfeeding       |                   | Yes                                                     |                                                   |                                                       |                                     |                                 |
|    |                        |              |                                | Started ART                              | 457                 |                     |                   |                                                         | Yes                                               |                                                       |                                     |                                 |
| 98 | Tiam, 2019             | 2014-2016    | Lesotho                        | Started ART                              | 370                 | Perinatal           |                   |                                                         | Yes                                               |                                                       | Yes                                 |                                 |



| ID  | Study               | Study years  | Location                | Maternal PMTCT regimen or infection type | HIV exposed infants | Transmission timing | Model 1: No PMTCT | Model 2: Maternal seroconversion and short course PMTCT | Model 3: Perinatal transmission from women on ART | Model 4: Breastfeeding transmission from women on ART | Viral suppression at delivery model | Added in 2024 systematic review |
|-----|---------------------|--------------|-------------------------|------------------------------------------|---------------------|---------------------|-------------------|---------------------------------------------------------|---------------------------------------------------|-------------------------------------------------------|-------------------------------------|---------------------------------|
| 99  |                     |              |                         | On ART                                   | 249                 |                     |                   |                                                         | Yes                                               |                                                       |                                     |                                 |
| 100 | Tonwe-Gold, 2007    | 2003-2005    | Ivory Coast             | Option A                                 | 122                 | Perinatal           |                   | Yes                                                     |                                                   |                                                       |                                     | No                              |
|     |                     |              |                         | Option B                                 | 52                  |                     |                   | Yes                                                     |                                                   |                                                       |                                     |                                 |
|     |                     |              |                         | Single dose Nevirapine, CD4 >350         | 86                  | Breastfeeding       |                   | Yes                                                     |                                                   |                                                       |                                     |                                 |
| 101 | Tookey, 2016        | 2003-2013    | United Kingdom          | Started ART                              | 2905                | Perinatal           |                   |                                                         | Yes                                               |                                                       | Yes                                 | No                              |
|     |                     |              |                         | On ART                                   | 968                 |                     |                   |                                                         | Yes                                               |                                                       | Yes                                 |                                 |
| 102 | Torpey, 2012        | 2007-2010    | Zambia                  | Option A                                 | 2366                | Perinatal           |                   | Yes                                                     |                                                   |                                                       |                                     | No                              |
|     |                     |              |                         | Single dose Nevirapine                   | 1143                |                     |                   | Yes                                                     |                                                   |                                                       |                                     |                                 |
| 103 | Tovo, 1991          | 1980-1989    | Italy                   | Infection                                | 10                  | Perinatal           |                   | Yes                                                     |                                                   |                                                       |                                     | No                              |
| 104 | Townsend, 2014      | 2000-2011    | United Kingdom, Ireland | Existing                                 | 54                  | Perinatal           | Yes               |                                                         |                                                   |                                                       |                                     | No                              |
|     |                     |              |                         | Started ART                              | 3422                |                     |                   |                                                         | Yes                                               |                                                       |                                     |                                 |
|     |                     |              |                         | On ART                                   | 2105                |                     |                   |                                                         | Yes                                               |                                                       |                                     |                                 |
| 105 | Tubiana, 2013       | 2007-2010    | France                  | Started ART                              | 36                  | Perinatal           |                   |                                                         | Yes                                               |                                                       | Yes                                 | No                              |
| 106 | Van de Perre, 1991  | 1988         | Rwanda                  | Infection                                | 15                  | Breastfeeding       |                   | Yes                                                     |                                                   |                                                       |                                     | No                              |
| 107 | Van Schalkwyk, 2013 | 2008-2010    | South Africa            | Started ART                              | 127                 | Perinatal           |                   |                                                         | Yes                                               |                                                       |                                     | No                              |
| 108 | Wiktor, 1999        | 1996-1998    | Ivory Coast             | Existing                                 | 119                 | Perinatal           | Yes               |                                                         |                                                   |                                                       |                                     | No                              |
|     |                     |              |                         |                                          | 115                 | Breastfeeding       | Yes               |                                                         |                                                   |                                                       |                                     |                                 |
| 109 | Yusuf, 2022         | Not reported | United States           | On ART                                   | 10                  | Perinatal           |                   |                                                         | Yes                                               |                                                       | Yes                                 | Yes                             |
|     |                     |              |                         |                                          | 9                   | Breastfeeding       |                   |                                                         |                                                   | Yes                                                   |                                     |                                 |
| 110 | Zijenah, 2022       | 2017-2018    | Zimbabwe                | Started ART                              | 179                 | Perinatal           |                   |                                                         | Yes                                               |                                                       | Yes                                 | Yes                             |
|     |                     |              |                         | On ART                                   | 272                 |                     |                   |                                                         | Yes                                               |                                                       | Yes                                 |                                 |
|     |                     |              |                         | Started ART                              | 61                  | Breastfeeding       |                   |                                                         |                                                   |                                                       | Yes                                 |                                 |

1. Aebi-Popp K, Kahlert CR, Crisinel PA, *et al.* Transfer of antiretroviral drugs into breastmilk: a prospective study from the Swiss Mother and Child HIV Cohort Study. *J Antimicrob Chemother* 2022; **77**: 3436–42.
2. Amone A, Gabagaya G, Wavamunno P, *et al.* Enhanced Peer-Group strategies to support prevention of Mother-to-Child HIV transmission leads to increased retention in care in Uganda: A Randomized controlled trial. *medRxiv* 2023. DOI:[10.1101/2023.04.15.23288495](https://doi.org/10.1101/2023.04.15.23288495).
3. Bailey H, European Collaborative Study in EuroCoord, Townsend C, Cortina-Borja M, Thorne C. Insufficient antiretroviral therapy in pregnancy: missed opportunities for prevention of mother-to-child transmission of HIV in Europe. *Antivir Ther* 2011; **16**: 895–903.
4. Birkhead GS, Pulver WP, Warren BL, Hackel S, Rodríguez D, Smith L. Acquiring human immunodeficiency virus during pregnancy and mother-to-child transmission in New York: 2002-2006. *Obstet Gynecol* 2010; **115**: 1247–55.
5. Black V, Hoffman RM, Sugar CA, *et al.* Safety and Efficacy of Initiating Highly Active Antiretroviral Therapy in an Integrated Antenatal and HIV Clinic in Johannesburg, South Africa. *J Acquir Immune Defic Syndr* 2008; **49**: 276–81.
6. Blonk MI, Colbers APH, Hidalgo-Tenorio C, *et al.* Raltegravir in HIV-1–Infected Pregnant Women: Pharmacokinetics, Safety, and Efficacy. *Clinical Infectious Diseases* 2015; **61**: 809–16.
7. Bornhede R, Soeria-Atmadja S, Westling K, Pettersson K, Navér L. Dolutegravir in pregnancy-effects on HIV-positive women and their infants. *Eur J Clin Microbiol Infect Dis* 2018; **37**: 495–500.
8. Carey L, Desouza C, Moorcroft A, Elgalib A. Pregnancy outcomes of women with HIV in a district general hospital in the UK. *J Obstet Gynaecol* 2018; **38**: 777–80.
9. Chasela CS, Hudgens MG, Jamieson DJ, *et al.* Maternal or Infant Antiretroviral Drugs to Reduce HIV-1 Transmission. *N Engl J Med* 2010; **362**: 2271–81.
10. Chauhan N, Desai M, Shah S, Shah A, Gadhavi R. Treatment outcome of different antiretroviral drug regimens in HIV-positive pregnant women. *Perspectives in Clinical Research* 2021; **12**: 40–7.
11. Chen JC, Zhang Y, Rongkavilit C, *et al.* Growth of HIV-Exposed Infants in Southwest China: A Comparative Study. *Glob Pediatr Health* 2019; **6**: 2333794X19854964.
12. Chibwasha CJ, Giganti MJ, Putta N, *et al.* Optimal Time on HAART for Prevention of Mother-to-Child Transmission of HIV. *J Acquir Immune Defic Syndr* 2011; **58**: 224–8.
13. Choi H, Kim MH, Lee SJ, *et al.* Pregnancy Rates and Outcomes of HIV-Infected Women in Korea. *J Korean Med Sci* 2018; **33**: e296.
14. Coetzee M, Delpont SD. Peripartum HIV infection in very low birth weight infants fed ‘raw’ mother’s own milk. *South Afr J HIV Med* 2019; **20**: 912.

15. Cohan D, Natureeba P, Koss CA, *et al.* Efficacy and Safety of Lopinavir/ritonavir- versus Efavirenz-based Antiretroviral Therapy in HIV-Infected Pregnant Ugandan Women. *AIDS* 2015; **29**: 183–91.
16. Colbers A, Best B, Schalkwijk S, *et al.* Maraviroc Pharmacokinetics in HIV-1–Infected Pregnant Women. *Clin Infect Dis* 2015; **61**: 1582–9.
17. Colbers A, Moltó J, Ivanovic J, *et al.* Pharmacokinetics of total and unbound darunavir in HIV-1-infected pregnant women. *J Antimicrob Chemother* 2015; **70**: 534–42.
18. Colebunders R. BREASTFEEDING AND TRANSMISSION OF HIV. *The Lancet* 1988; : 1487.
19. Connor EM, Sperling RS, Gelber R, *et al.* Reduction of Maternal-Infant Transmission of Human Immunodeficiency Virus Type 1 with Zidovudine Treatment. *N Engl J Med* 1994; **331**: 1173–80.
20. Coovadia HM, Brown ER, Fowler MG, *et al.* Efficacy and safety of an extended nevirapine regimen in infant children of breastfeeding mothers with HIV-1 infection for prevention of postnatal HIV-1 transmission (HPTN 046): a randomised, double-blind, placebo-controlled trial. *Lancet* 2012; **379**: 221–8.
21. Dabis F, Msellati P, Meda N, *et al.* 6-month efficacy, tolerance, and acceptability of a short regimen of oral zidovudine to reduce vertical transmission of HIV in breastfed children in Côte d'Ivoire and Burkina Faso: a double-blind placebo-controlled multicentre trial. *The Lancet* 1999; **353**: 786–92.
22. De Schacht C, Mabunda N, Ferreira OC, *et al.* High HIV incidence in the postpartum period sustains vertical transmission in settings with generalized epidemics: a cohort study in Southern Mozambique. *J Int AIDS Soc* 2014; **17**: 18808.
23. Delicio AM, Milanez H, Amaral E, *et al.* Mother-to-child transmission of human immunodeficiency virus in ten years period. *Reproductive Health* 2011; **8**: 35.
24. Dinh T-H, Delaney KP, Goga A, *et al.* Impact of Maternal HIV Seroconversion during Pregnancy on Early Mother to Child Transmission of HIV (MTCT) Measured at 4-8 Weeks Postpartum in South Africa 2011-2012: A National Population-Based Evaluation. *PLOS ONE* 2015; **10**: e0125525.
25. Dinh T-H, Mushavi A, Shiraishi RW, *et al.* Impact of Timing of Antiretroviral Treatment and Birth Weight on Mother-to-Child Human Immunodeficiency Virus Transmission: Findings From an 18-Month Prospective Cohort of a Nationally Representative Sample of Mother-Infant Pairs During the Transition From Option A to Option B+ in Zimbabwe. *Clin Infect Dis* 2018; **66**: 576–85.
26. Dryden-Peterson S, Jayeoba O, Hughes MD, *et al.* Highly Active Antiretroviral Therapy versus Zidovudine for Prevention of Mother-to-Child Transmission in a Programmatic Setting, Botswana. *J Acquir Immune Defic Syndr* 2011; **58**: 353–7.

- 27.** Ejikunle SD, Mbachu II, Okeudo C, Dike E, Ejikem E. Incident HIV infection and perinatal transmission rates among HIV negative pregnant women who retested in labor in a tertiary health centre, South East Nigeria. *Niger J Clin Pract* 2019; **22**: 1341–8.
- 28.** Ekpini ER, Wiktor SZ, Satten GA, *et al.* Late postnatal mother-to-child transmission of HIV-1 in Abidjan, Côte d'Ivoire. *Lancet* 1997; **349**: 1054–9.
- 29.** Embree JE, Njenga S, Datta P, *et al.* Risk factors for postnatal mother-child transmission of HIV-1. *AIDS* 2000; **14**: 2535–41.
- 30.** Ewenighi-Amankwah CO, Onyenekwe CC, Udemba O, Muogbo P, Rong L. A Mother-to-Child Transmission Study in Nigeria: The Impact of Maternal HIV Infection and HAART on Plasma Immunoglobulins, Cytokine Profiles and Infant Outcome. *Virol Sin* 2020; **35**: 468–77.
- 31.** Finocchiaro-Kessler S, Clark KF, Khamadi S, *et al.* Progress Toward Eliminating Mother to Child Transmission of HIV in Kenya: Review of Treatment Guideline Uptake and Pediatric Transmission at Four Government Hospitals Between 2010 and 2012. *AIDS and Behavior* 2015; **20**: 2302–611.
- 32.** Flynn PM, Taha TE, Cababasay M, *et al.* Prevention of HIV-1 Transmission Through Breastfeeding: Efficacy and Safety of Maternal Antiretroviral Therapy Versus Infant Nevirapine Prophylaxis for Duration of Breastfeeding in HIV-1-Infected Women With High CD4 Cell Count (IMPAACT PROMISE): A Randomized, Open-Label, Clinical Trial. *J Acquir Immune Defic Syndr* 2018; **77**: 383–92.
- 33.** Frange P, Tubiana R, Sibiude J, *et al.* Rilpivirine in HIV-1-positive women initiating pregnancy: to switch or not to switch? *J Antimicrob Chemother* 2020; **75**: 1324–31.
- 34.** Gantner P, Sylla B, Morand-Joubert L, *et al.* “Real life” use of raltegravir during pregnancy in France: The Coferal-IMEA048 cohort study. *PLoS ONE* 2019; **14**. DOI:[10.1371/journal.pone.0216010](https://doi.org/10.1371/journal.pone.0216010).
- 35.** Gibb DM, Kizito H, Russell EC, *et al.* Pregnancy and infant outcomes among HIV-infected women taking long-term ART with and without tenofovir in the DART trial. *PLoS Med* 2012; **9**: e1001217.
- 36.** Gill MM, Hoffman HJ, Ndatimana D, *et al.* 24-month HIV-free survival among infants born to HIV-positive women enrolled in Option B+ program in Kigali, Rwanda. *Medicine (Baltimore)* 2017; **96**: e9445.
- 37.** Giuliano M, Andreotti M, Liotta G, *et al.* Maternal Antiretroviral Therapy for the Prevention of Mother-To-Child Transmission of HIV in Malawi: Maternal and Infant Outcomes Two Years after Delivery. *PLOS ONE* 2013; **8**: e68950.
- 38.** Goga AE, Lombard C, Jackson D, *et al.* Impact of breastfeeding, maternal antiretroviral treatment and health service factors on 18-month vertical transmission of HIV and HIV-free

survival: results from a nationally representative HIV-exposed infant cohort, South Africa. *J Epidemiol Community Health* 2020; **74**: 1069–77.

**39.** Goga AE, Dinh T-H, Jackson DJ, *et al.* First population-level effectiveness evaluation of a national programme to prevent HIV transmission from mother to child, South Africa. *J Epidemiol Community Health* 2015; **69**: 240–8.

**40.** Goga AE, Dinh T, Jackson DJ, *et al.* Population-level effectiveness of PMTCT Option A on early mother-to-child (MTCT) transmission of HIV in South Africa: implications for eliminating MTCT. *J Glob Health* 2016; **6**: 020405.

**41.** Guay LA, Musoke P, Fleming T, *et al.* Intrapartum and neonatal single-dose nevirapine compared with zidovudine for prevention of mother-to-child transmission of HIV-1 in Kampala, Uganda: HIVNET 012 randomised trial. *Lancet* 1999; **354**: 795–802.

**42.** Habib Z, Bokharaei-Salim F, Kiani SJ, *et al.* Non detection of HIV-1 proviral DNA in pbmcs of the neonates born to iranian hiv-infected mothers in pmtct program. *Archives of Pediatric Infectious Diseases* 2021; **9**. DOI:[10.5812/pedinfect.105098](https://doi.org/10.5812/pedinfect.105098).

**43.** Harrington BJ, DiPrete BL, Jumbe AN, *et al.* Safety and efficacy of Option B+ ART in Malawi: few severe maternal toxicity events or infant HIV infections among pregnant women initiating tenofovir/lamivudine/efavirenz. *Trop Med Int Health* 2019; **24**: 1221–8.

**44.** Hira, Ug M, C M, *et al.* Apparent vertical transmission of human immunodeficiency virus type 1 by breast-feeding in Zambia. *The Journal of pediatrics* 1990; **117**. DOI:[10.1016/s0022-3476\(05\)81084-4](https://doi.org/10.1016/s0022-3476(05)81084-4).

**45.** Hoffman R, Black V, Technau K, *et al.* Effects of Highly Active Antiretroviral Therapy Duration and Regimen on Risk for Mother-to-Child Transmission of HIV in Johannesburg, South Africa. *J Acquir Immune Defic Syndr* 2010; **54**: 35–41.

**46.** Humphrey JH, Marinda E, Mutasa K, *et al.* Mother to child transmission of HIV among Zimbabwean women who seroconverted postnatally: prospective cohort study. *BMJ* 2010; **341**: c6580.

**47.** Huntington SE, Bansi LK, Thorne C, *et al.* Treatment switches during pregnancy among HIV-positive women on antiretroviral therapy at conception. *AIDS* 2011; **25**: 1647–55.

**48.** Iliff PJ, Piwoz EG, Tavengwa NV, *et al.* Early exclusive breastfeeding reduces the risk of postnatal HIV-1 transmission and increases HIV-free survival. *AIDS* 2005; **19**: 699–708.

**49.** João EC, Morrison RL, Shapiro DE, *et al.* Raltegravir versus efavirenz in antiretroviral-naïve pregnant women living with HIV (NICHD P1081): an open-label, randomised, controlled, phase 4 trial. *Lancet HIV* 2020; **7**: e322–31.

**50.** Kesho Bora Study Group. Eighteen-month follow-up of HIV-1-infected mothers and their children enrolled in the Kesho Bora study observational cohorts. *J Acquir Immune Defic Syndr* 2010; **54**: 533–41.

- 51.** Kesho Bora Study Group, de Vincenzi I. Triple antiretroviral compared with zidovudine and single-dose nevirapine prophylaxis during pregnancy and breastfeeding for prevention of mother-to-child transmission of HIV-1 (Kesho Bora study): a randomised controlled trial. *Lancet Infect Dis* 2011; **11**: 171–80.
- 52.** Kilewo C, Karlsson K, Ngarina M, *et al.* Prevention of mother-to-child transmission of HIV-1 through breastfeeding by treating mothers with triple antiretroviral therapy in Dar es Salaam, Tanzania: the Mitra Plus study. *J Acquir Immune Defic Syndr* 2009; **52**: 406–16.
- 53.** Kim MH, Ahmed S, Preidis GA, *et al.* Low Rates of Mother-to-Child HIV Transmission in a Routine Programmatic Setting in Lilongwe, Malawi. *PLOS ONE* 2013; **8**: e64979.
- 54.** Kuhn L, Aldrovandi GM, Sinkala M, Kankasa C, Mwiya M, Thea DM. Potential impact of new WHO criteria for antiretroviral treatment for prevention of mother-to-child HIV transmission. *AIDS* 2010; **24**: 1374–7.
- 55.** Lallemand M, Perinatal HIV Prevention Trial (Thailand) Investigators. Single-Dose Perinatal Nevirapine plus Standard Zidovudine to Prevent Mother-to-Child Transmission of HIV-1 in Thailand. *New England Journal of Medicine* 2004; **351**. DOI:[10.1056/NEJMoa033500](https://doi.org/10.1056/NEJMoa033500).
- 56.** le Roux SM, Abrams EJ, Nguyen KK, Myer L. HIV incidence during breastfeeding and mother-to-child transmission in Cape Town, South Africa. *AIDS* 2019; **33**: 1399–401.
- 57.** Liang K, Gui X, Zhang Y-Z, Zhuang K, Meyers K, Ho DD. A case series of 104 women infected with HIV-1 via blood transfusion postnatally: high rate of HIV-1 transmission to infants through breast-feeding. *J Infect Dis* 2009; **200**: 682–6.
- 58.** Lima YAR, Cardoso LPV, Reis MN da G, Stefani MMA. Incident and long-term HIV-1 infection among pregnant women in Brazil: Transmitted drug resistance and mother-to-child transmission. *J Med Virol* 2016; **88**: 1936–43.
- 59.** Loh M, Thoon KC, Mathur M, Kathirvel R. Management of HIV-positive pregnant women: a Singapore experience. *Singapore Med J* 2021; **62**: 599–603.
- 60.** M, Thorsteinsson K, Helleberg M, *et al.* Assessment of mode of delivery and predictors of emergency caesarean section among women living with HIV in a matched-pair setting with women from the general population in Denmark, 2002–2014. *HIV Medicine* 2017; **18**: 736–47.
- 61.** Malaba TR, Nakatudde I, Kintu K, *et al.* 72 weeks post-partum follow-up of dolutegravir versus efavirenz initiated in late pregnancy (DolPHIN-2): an open-label, randomised controlled study. *Lancet HIV* 2022; **9**: e534–43.
- 62.** Mandelbrot L, Tubiana R, Le Chenadec J, *et al.* No Perinatal HIV-1 Transmission From Women With Effective Antiretroviral Therapy Starting Before Conception. *Clinical Infectious Diseases* 2015; **61**: 1715–25.

- 63.** Marazzi MC, Liotta G, Nielsen-Saines K, *et al.* Extended antenatal antiretroviral use correlates with improved infant outcomes throughout the first year of life. *AIDS* 2010; **24**: 2819.
- 64.** Marinda ET, Moulton LH, Humphrey JH, *et al.* In utero and intra-partum HIV-1 transmission and acute HIV-1 infection during pregnancy: using the BED capture enzyme-immunoassay as a surrogate marker for acute infection. *Int J Epidemiol* 2011; **40**: 945–54.
- 65.** Martinson NA, Ekouevi DK, Dabis F, *et al.* Transmission rates in consecutive pregnancies exposed to single-dose nevirapine in Soweto, South Africa and Abidjan, Côte d'Ivoire. *J Acquir Immune Defic Syndr* 2007; **45**: 206–9.
- 66.** Mayaux MJ, Blanche S, Rouzioux C, *et al.* Maternal factors associated with perinatal HIV-1 transmission: the French Cohort Study: 7 years of follow-up observation. The French Pediatric HIV Infection Study Group. *J Acquir Immune Defic Syndr Hum Retrovirol* 1995; **8**: 188–94.
- 67.** Meggi B, Vojnov L, Mabunda N, *et al.* Performance of point-of-care birth HIV testing in primary health care clinics: An observational cohort study. *PLoS One* 2018; **13**: e0198344.
- 68.** Meyers K, Qian H, Wu Y, *et al.* Early Initiation of ARV During Pregnancy to Move towards Virtual Elimination of Mother-to-Child-Transmission of HIV-1 in Yunnan, China. *PLOS ONE* 2015; **10**: e0138104.
- 69.** Moodley D, Moodley J, Coovadia H, *et al.* A multicenter randomized controlled trial of nevirapine versus a combination of zidovudine and lamivudine to reduce intrapartum and early postpartum mother-to-child transmission of human immunodeficiency virus type 1. *J Infect Dis* 2003; **187**: 725–35.
- 70.** Myer L, Phillips TK, McIntyre JA, *et al.* HIV viraemia and mother-to-child transmission risk after antiretroviral therapy initiation in pregnancy in Cape Town, South Africa. *HIV Med* 2017; **18**: 80–8.
- 71.** Namukwaya Z, Mudiope P, Kekitiinwa A, *et al.* The Impact of Maternal Highly Active Antiretroviral Therapy and Short-Course Combination Antiretrovirals for Prevention of Mother-to-Child Transmission on Early Infant Infection Rates at the Mulago National Referral Hospital in Kampala, Uganda, January 2007 to May 2009. *JAIDS Journal of Acquired Immune Deficiency Syndromes* 2011; **56**: 69.
- 72.** Ndarukwa V, Zunza M. Combination antiretroviral treatment use in prevention of mother-to-child transmission programmes: 6-week HIV prevalence and relationship to time of antiretroviral treatment initiation and mixed feeding. *S Afr J Infect Dis* 2019; **34**: 117.
- 73.** Nduati R, John G, Mbori-Ngacha D, *et al.* Effect of breastfeeding and formula feeding on transmission of HIV-1: a randomized clinical trial. *JAMA* 2000; **283**: 1167–74.
- 74.** Nesheim S, Jamieson DJ, Danner SP, *et al.* Primary human immunodeficiency virus infection during pregnancy detected by repeat testing. *Am J Obstet Gynecol* 2007; **197**: 149.e1-5.

- 75.** Ngoma MS, Misir A, Mutale W, *et al.* Efficacy of WHO recommendation for continued breastfeeding and maternal cART for prevention of perinatal and postnatal HIV transmission in Zambia. *J Int AIDS Soc* 2015; **18**: 19352.
- 76.** Njom Nlend AE, Same Ekobo C, Bagfegue Ekani B, *et al.* Preventing HIV-1 transmission in breastfed infants in low resource settings: early HIV infection and late postnatal transmission in a routine prevention of mother-to-child transmission program in Yaounde, Cameroon. *J Trop Pediatr* 2013; **59**: 387–92.
- 77.** Nyandiko WM, Otieno-Nyunya B, Musick B, *et al.* Outcomes of HIV-exposed children in western Kenya: efficacy of prevention of mother to child transmission in a resource-constrained setting. *J Acquir Immune Defic Syndr* 2010; **54**: 42–50.
- 78.** Olana T, Bacha T, Worku W, Tadesse BT. Early infant diagnosis of HIV infection using DNA-PCR at a referral center: an 8 years retrospective analysis. *AIDS Res Ther* 2016; **13**: 29.
- 79.** Palasanthiran P, Ziegler JB, Stewart GJ, *et al.* Breast-feeding during primary maternal human immunodeficiency virus infection and risk of transmission from mother to infant. *J Infect Dis* 1993; **167**: 441–4.
- 80.** Pellowski J, Wedderburn C, Stadler JAM, *et al.* Implementation of prevention of mother-to-child transmission (PMTCT) in South Africa: outcomes from a population-based birth cohort study in Paarl, Western Cape. *BMJ Open* 2019; **9**: e033259.
- 81.** Peltier C-A, Ndayisaba G-F, Lepage P, *et al.* Breastfeeding with maternal antiretroviral therapy or formula feeding to prevent HIV postnatal mother-to-child transmission in Rwanda. *AIDS* 2009; **23**: 2415–23.
- 82.** Perry MEO, Taylor GP, Sabin CA, *et al.* Lopinavir and atazanavir in pregnancy: comparable infant outcomes, virological efficacies and preterm delivery rates. *HIV Med* 2016; **17**: 28–35.
- 83.** Peters H, Francis K, Sconza R, *et al.* UK Mother-to-Child HIV Transmission Rates Continue to Decline: 2012-2014. *Clin Infect Dis* 2017; **64**: 527–8.
- 84.** Petra Study Team. Efficacy of three short-course regimens of zidovudine and lamivudine in preventing early and late transmission of HIV-1 from mother to child in Tanzania, South Africa, and Uganda (Petra study): a randomised, double-blind, placebo-controlled trial. *Lancet* 2002; **359**: 1178–86.
- 85.** Prieto LM, Madrid Cohort of HIV-Infected Mother-Infant Pairs. Low rates of mother-to-child transmission of HIV-1 and risk factors for infection in Spain: 2000-2007. *Pediatr Infect Dis J* 2012; **31**: 1053–8.



- 86.** Rollins N, Little K, Mzolo S, Horwood C, Newell M-L. Surveillance of mother-to-child transmission prevention programmes at immunization clinics: the case for universal screening. *AIDS* 2007; **21**: 1341–7.
- 87.** Roongpisuthipong A, Siriwasin W, Simonds RJ, *et al.* HIV seroconversion during pregnancy and risk for mother-to-infant transmission. *J Acquir Immune Defic Syndr* 2001; **26**: 348–51.
- 88.** Sagna T, Bisseye C, Compaore TR, *et al.* Prevention of mother-to-child HIV-1 transmission in Burkina Faso: evaluation of vertical transmission by PCR, molecular characterization of subtypes and determination of antiretroviral drugs resistance. *Glob Health Action* 2015; **8**: 26065.
- 89.** Salazar-Austin N, Hoffmann J, Cohn S, *et al.* Poor Obstetric and Infant Outcomes in Human Immunodeficiency Virus-Infected Pregnant Women With Tuberculosis in South Africa: The Tshepiso Study. *Clin Infect Dis* 2018; **66**: 921–9.
- 90.** Samuel M, Bradshaw D, Perry M, *et al.* Antenatal atazanavir: a retrospective analysis of pregnancies exposed to atazanavir. *Infect Dis Obstet Gynecol* 2014; **2014**: 961375.
- 91.** Schalkwijk S, Colbers A, Konopnicki D, *et al.* Lowered Rilpivirine Exposure During the Third Trimester of Pregnancy in Human Immunodeficiency Virus Type 1-Infected Women. *Clin Infect Dis* 2017; **65**: 1335–41.
- 92.** Scott GB, Brogly SB, Muenz D, Stek AM, Read JS. Missed Opportunities for Prevention of Mother-to-Child Transmission of Human Immunodeficiency Virus. *Obstet Gynecol* 2017; **129**: 621–8.
- 93.** Shaffer N, Chuachoowong R, Mock PA, *et al.* Short-course zidovudine for perinatal HIV-1 transmission in Bangkok, Thailand: a randomised controlled trial. *The Lancet* 1999; **353**: 773–80.
- 94.** Shapiro RL, Hughes MD, Ogwu A, *et al.* Antiretroviral regimens in pregnancy and breast-feeding in Botswana. *N Engl J Med* 2010; **362**: 2282–94.
- 95.** Shapiro RL, Thior I, Gilbert PB, *et al.* Maternal single-dose nevirapine versus placebo as part of an antiretroviral strategy to prevent mother-to-child HIV transmission in Botswana. *AIDS* 2006; **20**: 1281.
- 96.** Sibiude J, Chenadec J le, Mandelbrot L, *et al.* Update of perinatal Human immunodeficiency virus type 1 transmission in France: zero transmission for 5482 mothers on continuous antiretroviral therapy from conception and with undetectable viral load at delivery. *Clinical Infectious Diseases* 2022; **76**: e590–8.
- 97.** Six Week Extended-Dose Nevirapine (SWEN) Study Team, Bedri A, Gudetta B, *et al.* Extended-dose nevirapine to 6 weeks of age for infants to prevent HIV transmission via breastfeeding in Ethiopia, India, and Uganda: an analysis of three randomised controlled trials. *Lancet* 2008; **372**: 300–13.

- 98.** Thomas TK, Masaba R, Borkowf CB, *et al.* Triple-Antiretroviral Prophylaxis to Prevent Mother-To-Child HIV Transmission through Breastfeeding—The Kisumu Breastfeeding Study, Kenya: A Clinical Trial. *PLoS Med* 2011; **8**: e1001015.
- 99.** Tiam A, Kassaye SG, Machezano R, *et al.* Comparison of 6-week PMTCT outcomes for HIV-exposed and HIV-unexposed infants in the era of lifelong ART: Results from an observational prospective cohort study. *PLoS One* 2019; **14**: e0226339.
- 100.** Tonwe-Gold B, Ekouevi DK, Viho I, *et al.* Antiretroviral treatment and prevention of peripartum and postnatal HIV transmission in West Africa: evaluation of a two-tiered approach. *PLoS Med* 2007; **4**: e257.
- 101.** Tookey PA, Thorne C, van Wyk J, Norton M. Maternal and foetal outcomes among 4118 women with HIV infection treated with lopinavir/ritonavir during pregnancy: analysis of population-based surveillance data from the national study of HIV in pregnancy and childhood in the United Kingdom and Ireland. *BMC Infectious Diseases* 2016; **16**: 65.
- 102.** Torpey K, Mandala J, Kasonde P, *et al.* Analysis of HIV Early Infant Diagnosis Data to Estimate Rates of Perinatal HIV Transmission in Zambia. *PLOS ONE* 2012; **7**: e42859.
- 103.** Tovo PA, Palomba E, Gabiano C, Galli L, de Martino M. Human immunodeficiency virus type 1 (HIV-1) seroconversion during pregnancy does not increase the risk of perinatal transmission. *Br J Obstet Gynaecol* 1991; **98**: 940–2.
- 104.** Townsend CL, Byrne L, Cortina-Borja M, *et al.* Earlier initiation of ART and further decline in mother-to-child HIV transmission rates, 2000-2011. *AIDS* 2014; **28**: 1049–57.
- 105.** Tubiana R, Mandelbrot L, Le Chenadec J, *et al.* Lopinavir/ritonavir monotherapy as a nucleoside analogue-sparing strategy to prevent HIV-1 mother-to-child transmission: the ANRS 135 PRIMEVA phase 2/3 randomized trial. *Clin Infect Dis* 2013; **57**: 891–902.
- 106.** Van de Perre P, Simonon A, Msellati P, *et al.* Postnatal transmission of human immunodeficiency virus type 1 from mother to infant. A prospective cohort study in Kigali, Rwanda. *N Engl J Med* 1991; **325**: 593–8.
- 107.** Van Schalkwyk M, Andersson MI, Zeier MD, La Grange M, Taljaard JJ, Theron GB. The Impact of Revised PMTCT Guidelines: A View From a Public Sector ARV Clinic in Cape Town, South Africa. *J Acquir Immune Defic Syndr* 2013; **63**: 234–8.
- 108.** Wiktor SZ, Ekpini E, Karon JM, *et al.* Short-course oral zidovudine for prevention of mother-to-child transmission of HIV-1 in Abidjan, Côte d'Ivoire: a randomised trial. *Lancet* 1999; **353**: 781–5.
- 109.** Yusuf HE, Knott-Grasso MA, Anderson J, *et al.* Experience and Outcomes of Breastfed Infants of Women Living With HIV in the United States: Findings From a Single-Center Breastfeeding Support Initiative. *J Pediatric Infect Dis Soc* 2022; **11**: 24–7.

**110.** Zijenah LS, Bandason T, Bara W, Chipiti MM, Katzenstein DA. Impact of Option B+ Combination Antiretroviral Therapy on Mother-To-Child Transmission of HIV-1, Maternal and Infant Virologic Responses to Combination Antiretroviral Therapy, and Maternal and Infant Mortality Rates: A 24-Month Prospective Follow-Up Study. *AIDS Patient Care and STDs* 2022; **36**: 145–52.

## S4. Meta-regression model estimates

### S4.1 Regression tables for all models

**Table S4.1.1.** Regression table for models one, two, three, and four used to estimate VT probabilities compatible with Spectrum-AIM

| <b>Model one: VT probability from women not receiving PMTCT</b>                                         |             |                  |                         |                       |                         |
|---------------------------------------------------------------------------------------------------------|-------------|------------------|-------------------------|-----------------------|-------------------------|
| Covariate                                                                                               |             | Estimate (logit) | 95% confidence interval | Estimate (odds ratio) | 95% confidence interval |
| Intercept                                                                                               |             | -1.61            | (-1.81, -1.41)          | 0.20                  | (0.16, 0.24)            |
| CD4 midpoint (per 100 cells increase, centered on CD4 = 500 mm <sup>3</sup> )                           |             | -0.23            | (-0.28, -0.17)          | 0.80                  | (0.75, 0.84)            |
| Perinatal transmission (Reference)                                                                      |             | 0.0              | (Reference)             | 1.00                  | (Reference)             |
| Breastfeeding transmission                                                                              |             | -3.22            | (-3.84, -2.60)          | 0.04                  | (0.02, 0.07)            |
| Interaction between CD4 midpoint and breastfeeding transmission                                         |             | 0.17             | (-0.21, 0.54)           | 1.18                  | (0.81, 1.72)            |
| <b>Model two: VT probability from maternal seroconversion or short course PMTCT</b>                     |             |                  |                         |                       |                         |
| Covariate                                                                                               |             | Estimate (logit) | 95% confidence interval | Estimate (odds)       | 95% confidence interval |
| Transmission timing                                                                                     | Category    |                  |                         |                       |                         |
| Perinatal                                                                                               | Infection   | -1.51            | (-1.92, -1.09)          | 0.222                 | (0.147, 0.335)          |
|                                                                                                         | SDNVP       | -2.4             | (-2.75, -2.05)          | 0.091                 | (0.064, 0.129)          |
|                                                                                                         | Dual ARV    | -3.43            | (-3.85, -3.02)          | 0.032                 | (0.021, 0.049)          |
|                                                                                                         | Option A    | -3.43            | (-3.73, -3.14)          | 0.032                 | (0.024, 0.043)          |
|                                                                                                         | Option B    | -4.02            | (-4.28, -3.77)          | 0.018                 | (0.014, 0.023)          |
| Breastfeeding (monthly)                                                                                 | Infection   | -0.93            | (-1.34, -0.53)          | 0.222                 | (0.147, 0.335)          |
|                                                                                                         | SDNVP, <350 | -4.73            | (-6.45, -3.01)          | 0.394                 | (0.263, 0.591)          |
|                                                                                                         | SDNVP, >350 | -5.64            | (-7.43, -3.84)          | 0.009                 | (0.002, 0.049)          |
|                                                                                                         | Dual ARV    | -6.19            | (-7.49, -4.88)          | 0.004                 | (0.001, 0.021)          |
|                                                                                                         | Option A    | -6.21            | (-7.35, -5.06)          | 0.002                 | (0.001, 0.008)          |
|                                                                                                         | Option B    | -6.57            | (-7.31, -5.84)          | 0.002                 | (0.001, 0.006)          |
| <b>Model three: Perinatal transmission probability from women receiving ART by timing of initiation</b> |             |                  |                         |                       |                         |
| Covariate                                                                                               |             | Estimate (logit) | 95% confidence interval | Estimate (odds ratio) | 95% confidence interval |
| Intercept                                                                                               |             | -4.55            | (-4.77, -4.33)          | 0.011                 | (0.009, 0.013)          |
| Weeks on ART before delivery (centered on 20 weeks)                                                     |             | -0.06            | (-0.07, -0.04)          | 0.944                 | (0.932, 0.957)          |
| Late ART initiation (<4 weeks before delivery)                                                          |             | 0.65             | (-0.06, 1.35)           | 1.914                 | (0.946, 3.873)          |
| <b>Model four: Monthly breastfeeding transmission from women receiving lifelong ART</b>                 |             |                  |                         |                       |                         |
| Covariate                                                                                               |             | Estimate (logit) | 95% confidence interval | Estimate (odds ratio) | 95% confidence interval |
| Intercept (on ART preconception)                                                                        |             | -8.72            | (-10.07, -7.36)         | 0.000                 | (0.000, 0.001)          |
| ART started during pregnancy                                                                            |             | 2.07             | (0.64, 3.51)            | 7.939                 | (1.892, 33.322)         |

**Table S4.1.2.** Regression table for model three with fixed effects on ART regimen class

| Covariate                                           | Estimate (logit) | 95% confidence interval | Estimate (odds ratio) | 95% confidence interval |
|-----------------------------------------------------|------------------|-------------------------|-----------------------|-------------------------|
| Intercept                                           | -4.45            | (-4.70, -4.19)          | 0.012                 | (0.009, 0.015)          |
| Weeks on ART before delivery (centered on 20 weeks) | -0.06            | (-0.07, -0.04)          | 0.946                 | (0.933, 0.959)          |
| Late ART initiation (<4 weeks before delivery)      | 0.67             | (-0.03, 1.38)           | 1.96                  | (0.971, 3.956)          |
| <b>ART class</b>                                    |                  |                         |                       |                         |
| NNRTI (reference)                                   | 0.00             | (Reference)             | 1.00                  | (Reference)             |
| INSTI                                               | -1.04            | (-1.97, -0.11)          | 0.355                 | (0.140, 0.898)          |
| PI                                                  | -0.10            | (-0.51, 0.32)           | 0.907                 | (0.599, 1.371)          |
| Miscellaneous regimens                              | -0.07            | (-0.64, 0.51)           | 0.933                 | (0.525, 1.660)          |

**Table S4.1.3.** Regression table for viral load suppression model by ART regimen class and timing of ART initiation

| Covariate                                              | Estimate (logit) | 95% confidence interval | Estimate (odds ratio) | 95% confidence interval |
|--------------------------------------------------------|------------------|-------------------------|-----------------------|-------------------------|
| Intercept                                              | 2.28             | (1.42, 2.95)            | 9.76                  | (4.15, 19.04)           |
| <b>ART class</b>                                       |                  |                         |                       |                         |
| NNRTI (reference)                                      | 0.00             | (Reference)             | 1.00                  | (Reference)             |
| INSTI                                                  | 0.67             | (-0.71, 2.18)           | 1.96                  | (0.49, 8.87)            |
| PI                                                     | -0.74            | (-1.45, 0.01)           | 0.48                  | (0.23, 1.01)            |
| Miscellaneous regimens                                 | 0.00             | (-0.82, 0.77)           | 1.00                  | (0.44, 2.16)            |
| Later ART initiation (After 1 <sup>st</sup> trimester) | -0.7             | (-1.29, -0.12)          | 0.49                  | (0.28, 0.88)            |
| Interaction with INSTI                                 | -2.71            | (-5.55, -0.09)          | 0.07                  | (0.00, 0.91)            |
| Interaction with PI                                    | -0.19            | (-0.99, 0.57)           | 0.82                  | (0.37, 1.76)            |
| Interaction with miscellaneous regimens                | -0.70            | (-2.90, 1.42)           | 0.50                  | (0.06, 4.16)            |

## S4.2 Study-level and pooled estimates of vertical transmission probability

This analysis incorporates data from previous systematic reviews of VT probability and fits four meta-regression models to produce estimates of VT probability compatible with Spectrum-AIM. Here we present pooled estimates from the four meta-regression models presented in the main text (model one, model two, model three, and model 4) in forest plots ('Modelled: 2024'). We also present the weighted average of the studies used to produce the default VT used in Spectrum-AIM ('Weighted average: default') and estimates from models two and four fit to the default studies ('Modelled: default'). When using the default data, there was insufficient data to fit model one and model three. For each category, we give reasons for excluding studies that had been used in the default estimates but are not used in this analysis.

## Model 1: No PMTCT, perinatal

### A. CD4 midpoint [0-200]

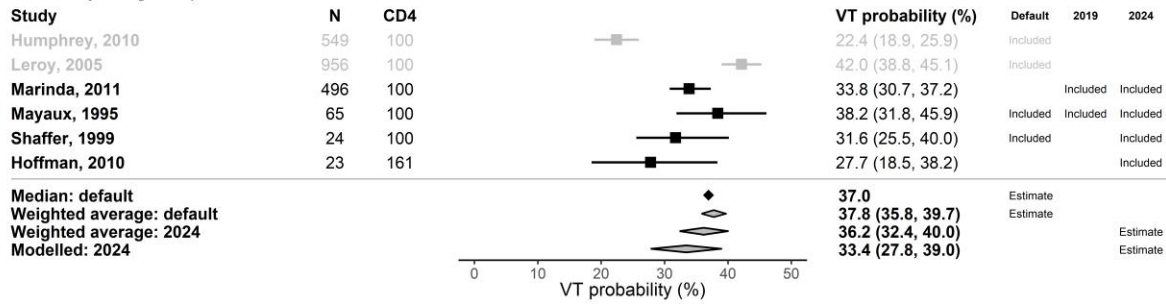

### B. CD4 midpoint [200-350]

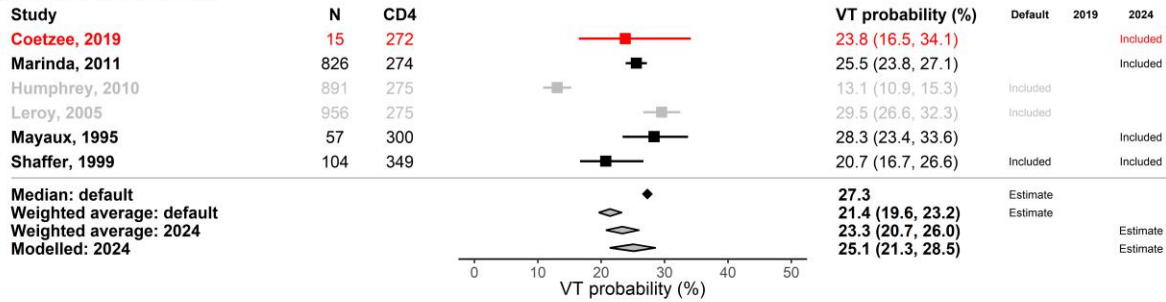

### C. CD4 midpoint >350

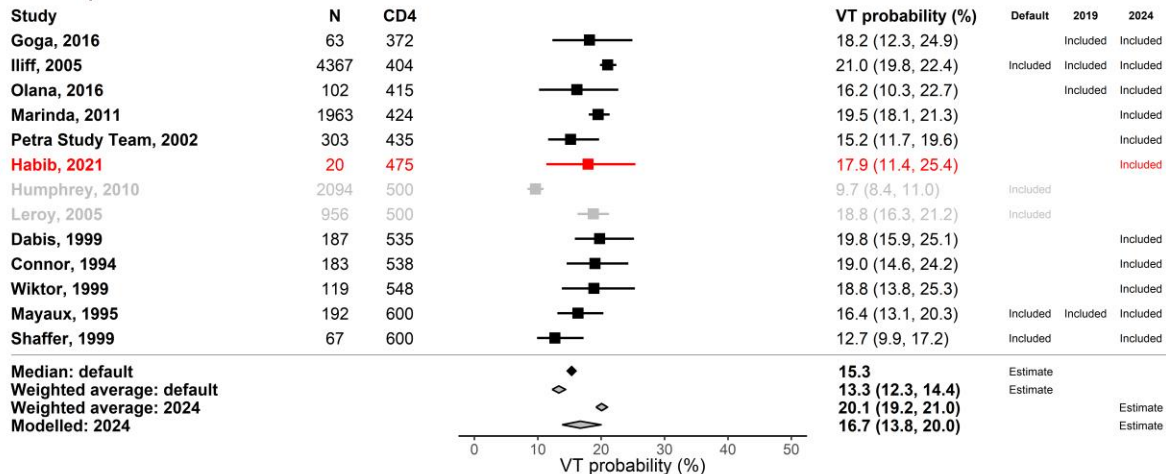

**Figure S4.2.1 Pooled estimates of perinatal VT among women not receiving PMTCT.**

Results are stratified by the Spectrum-AIM defined CD4 ranges. The following pooled estimates are presented: median of studies included in the default VT probabilities ('Median: default'), the weighted average of studies included in the default VT probabilities ('Weighted average: default'), the weighted average of studies included in this analysis ('Weighted average: 2024'), and the results of the model one ('Modelled: 2024'). Humphrey 2010 was excluded as it was not a peer-reviewed study and Leroy 2005 was excluded as it was a pooled analysis using data from other included studies.

### Model 1: No PMTCT, breastfeeding

#### A. CD4 midpoint [0-200]

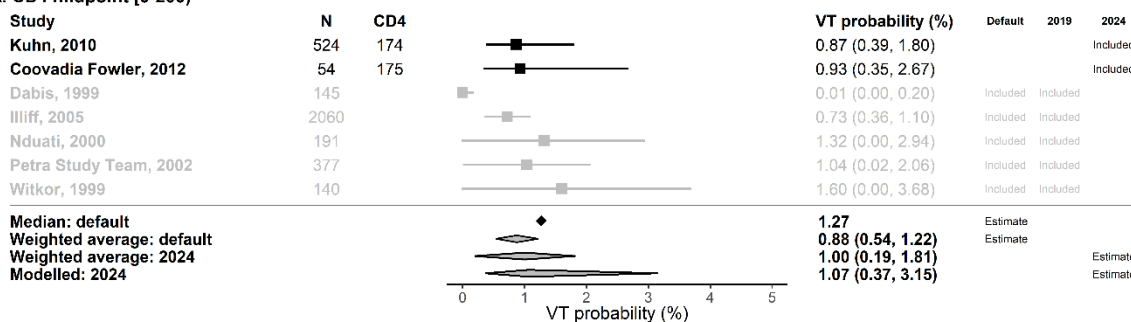

#### B. CD4 midpoint [200-350]

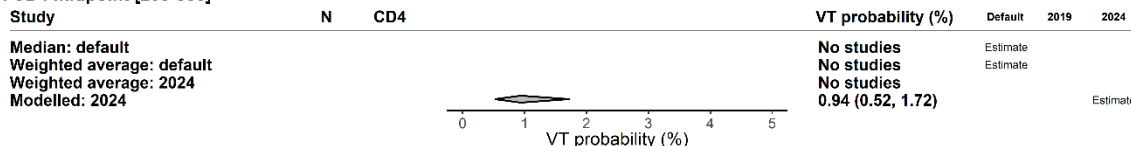

#### C. CD4 midpoint >350

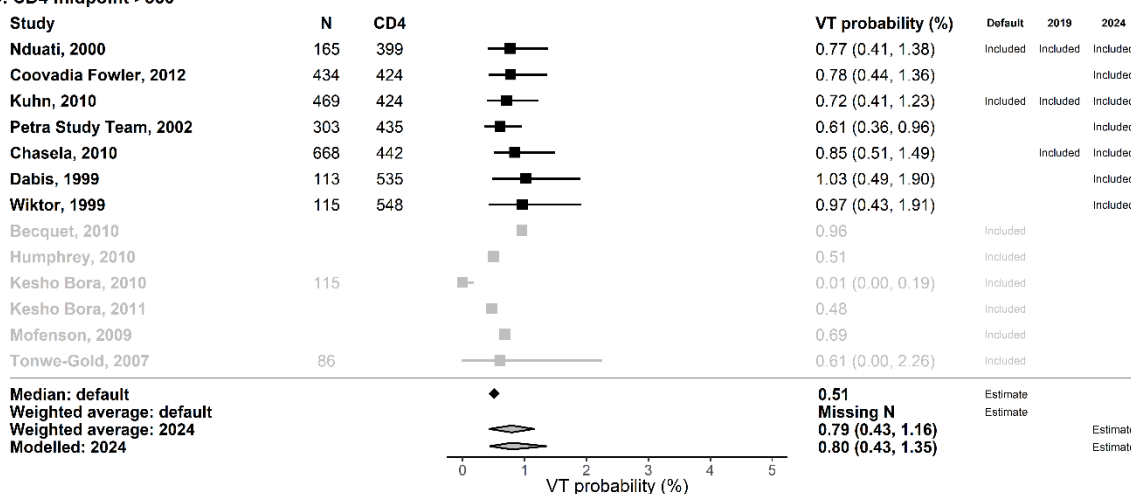

### Figure S4.2.2 Pooled estimates of breastfeeding VT among women not receiving

**PMTCT.** Results are stratified by the Spectrum-AIM defined CD4 ranges. The following pooled estimates are presented: median of studies included in the default VT probabilities ('Median: default'), the weighted average of studies included in the default VT probabilities ('Weighted average: default'), the weighted average of studies included in this analysis ('Weighted average: 2024'), and the results of the model one ('Modelled: 2024'). Kesho Bora 2010, Kesho Bora 2011, and Tonwe-Gold 2007 were excluded as mothers received AZT. Becquet 2010, Humphrey 2010, and Mofenson 2009 were excluded as they were not peer-reviewed studies. Iliff 2005 was excluded as it was a pooled analysis using data from other included studies.

### Model 2: Maternal seroconversion, perinatal

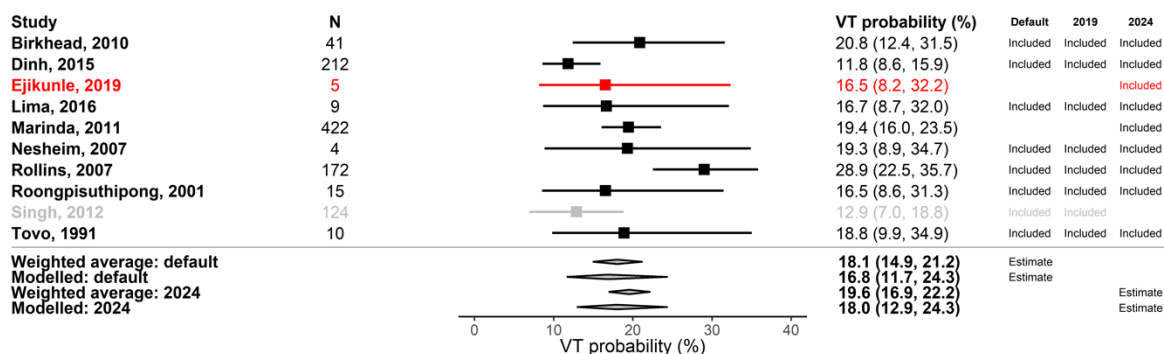

### Figure S4.2.3 Pooled estimates of VT among women who seroconverted during pregnancy.

The following pooled estimates are presented: the weighted average of studies included in the default VT



probabilities ('Weighted average: default'), estimates from model two fit to the default studies ('Modelled: default'), the weighted average of studies included in this analysis ('Weighted average: 2024'), and the results of the model two ('Modelled: 2024'). Singh 2012 was excluded as it was not a peer-reviewed study.

### Model 2: Maternal seroconversion, breastfeeding

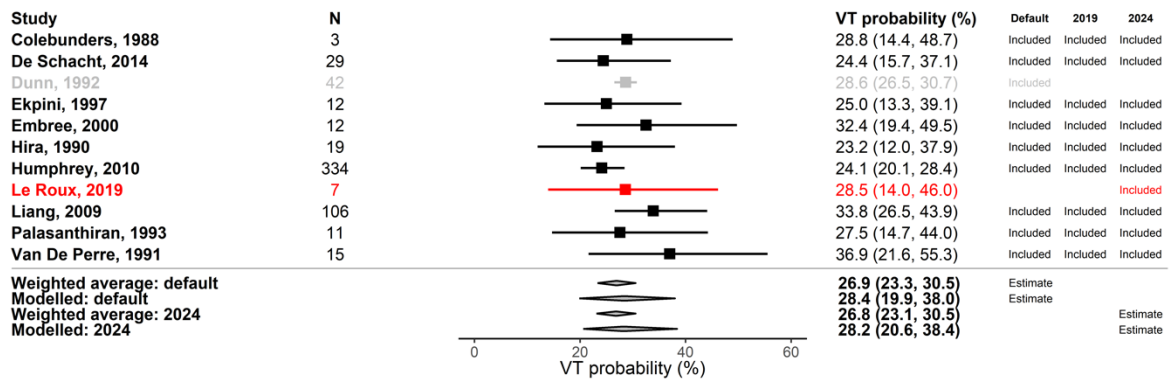

**Figure S4.2.4 Pooled estimates of VT among women who seroconverted during breastfeeding.** The following pooled estimates are presented: the weighted average of studies included in the default VT probabilities ('Weighted average: default'), estimates from model two fit to the default studies ('Modelled: default'), the weighted average of studies included in this analysis ('Weighted average: 2024'), and the results of the model two ('Modelled: 2024'). Singh 2012 was excluded as it was not a peer-reviewed study. Dunn 1992 was excluded as it was a pooled analysis using data from other included studies.

### Model 2: Dual ARV, perinatal

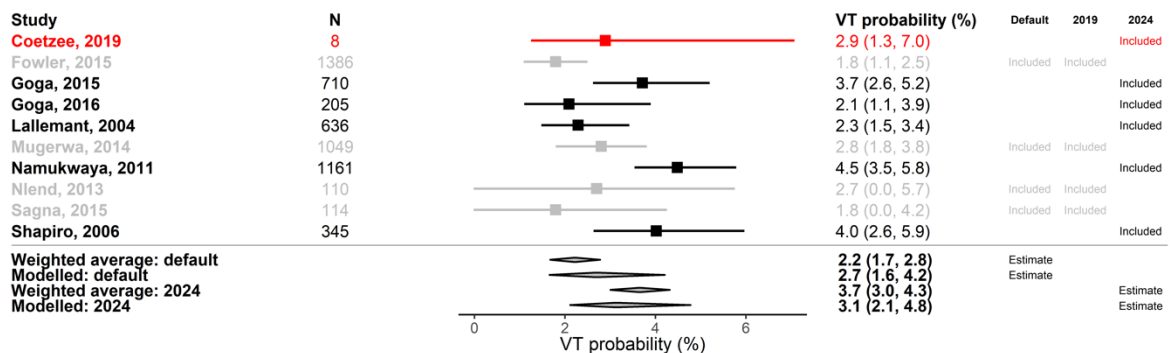

**Figure S4.2.5 Pooled estimates of perinatal VT among women receiving dual ARV.** The following pooled estimates are presented: the weighted average of studies included in the default VT probabilities ('Weighted average: default'), estimates from model two fit to the default studies ('Modelled: default'), the weighted average of studies included in this analysis ('Weighted average: 2024'), and the results of the model two ('Modelled: 2024'). Fowler 2015 and Mugerwa 2014 were excluded as they were not peer-reviewed studies and Nlend 2013 and Sagna 2015 were excluded as they excluded WLHIV with CD4 <350.

### Model 2: Dual ARV, breastfeeding

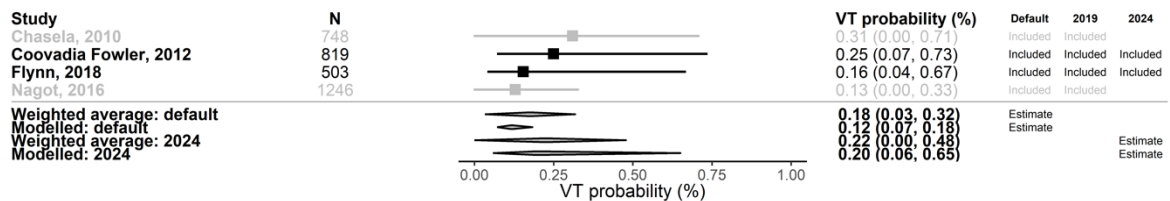

**Figure S4.2.6 Pooled estimates of breastfeeding VT among women receiving dual ARV.** The following pooled estimates are presented: the weighted average of studies included in the default VT probabilities ('Weighted average: default'), estimates from model two fit to the default studies ('Modelled: default'), the weighted average of

studies included in this analysis ('Weighted average: 2024'), and the results of the model two ('Modelled: 2024'). Chasela 2010 and Nagot 2016 was excluded as they excluded WLHIV with CD4 < 350.

### Model 2: SDNVP, perinatal

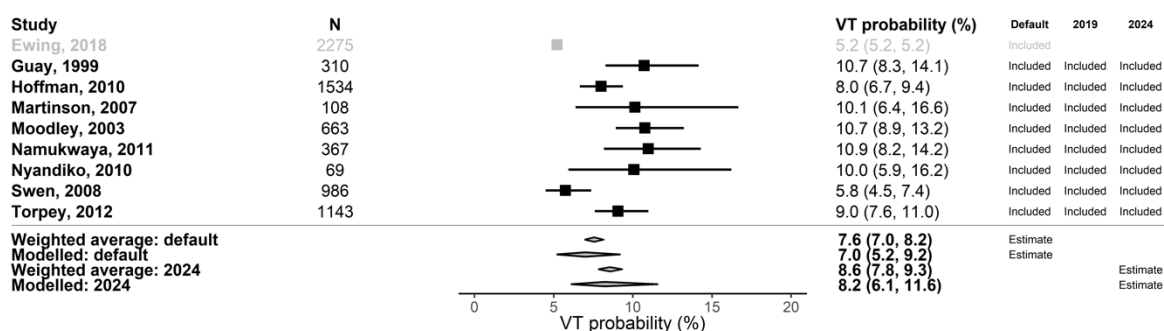

**Figure S4.2.7 Pooled estimates of perinatal VT among women receiving single dose nevirapine.**

The following pooled estimates are presented: the weighted average of studies included in the default VT probabilities ('Weighted average: default'), estimates from model two fit to the default studies ('Modelled: default'), the weighted average of studies included in this analysis ('Weighted average: 2024'), and the results of the model two ('Modelled: 2024'). Ewing 2018 was excluded as it was not a peer-reviewed study.

### Model 2: SDNVP CD4 <350, breastfeeding

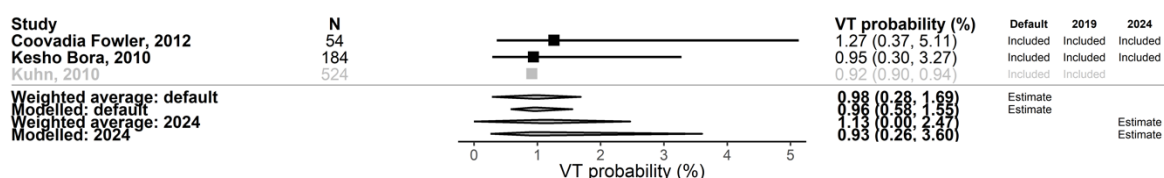

**Figure S4.2.8 Pooled estimates of breastfeeding VT among women with CD4 < 350 receiving single dose nevirapine.**

The following pooled estimates are presented: the weighted average of studies included in the default VT probabilities ('Weighted average: default'), estimates from model two fit to the default studies ('Modelled: default'), the weighted average of studies included in this analysis ('Weighted average: 2024'), and the results of the model two ('Modelled: 2024'). Kuhn 2010 was excluded as WLHIV were receiving ART.

### Model 2: SDNVP CD4 >350, breastfeeding

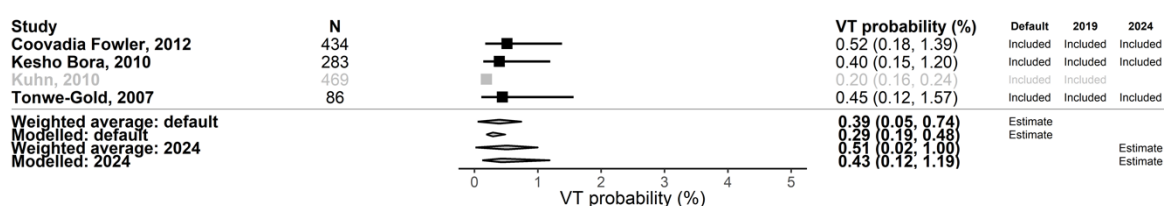

**Figure S4.2.9 Pooled estimates of breastfeeding VT among women with CD4 >350 receiving single dose nevirapine.**

The following pooled estimates are presented: the weighted average of studies included in the default VT probabilities ('Weighted average: default'), estimates from model two fit to the default studies ('Modelled: default'), the weighted average of studies included in this analysis ('Weighted average: 2024'), and the results of the model two ('Modelled: 2024'). Kuhn 2010 was excluded as WLHIV were receiving ART.

### Model 2: Option A, perinatal

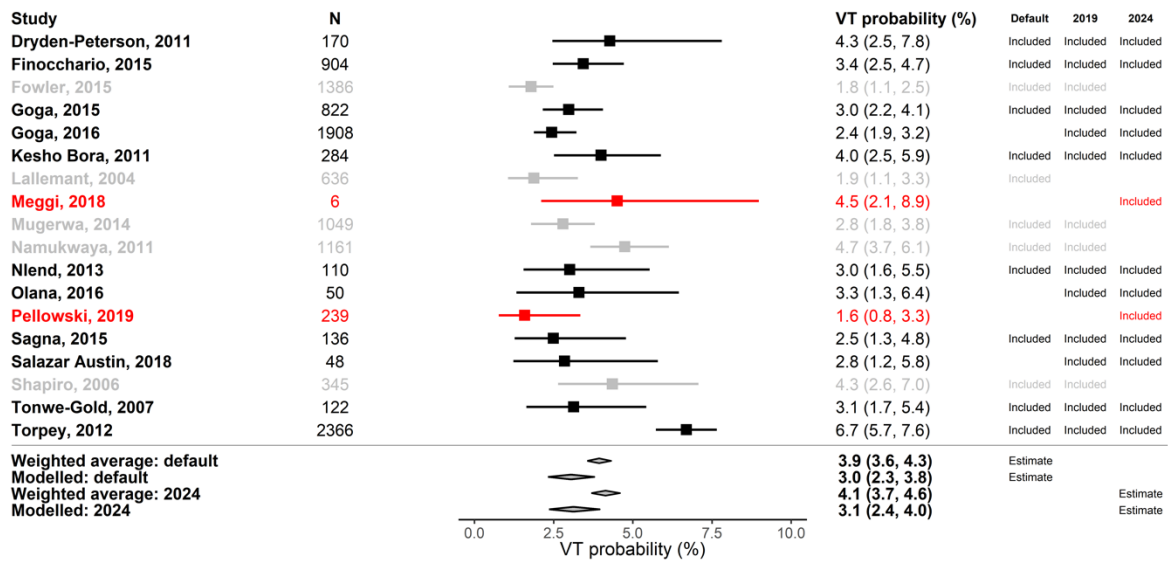

**Figure S4.2.10 Pooled estimates of perinatal VT among women receiving Option A.** The following pooled estimates are presented: the weighted average of studies included in the default VT probabilities ('Weighted average: default'), estimates from model two fit to the default studies ('Modelled: default'), the weighted average of studies included in this analysis ('Weighted average: 2024'), and the results of the model two ('Modelled: 2024'). Fowler 2015 and Mugerwa 2014 were excluded as they were not peer-reviewed studies, all other studies that were excluded had women who initiated AZT at 28 weeks rather than 14 weeks.

### Model 2: Option A, breastfeeding

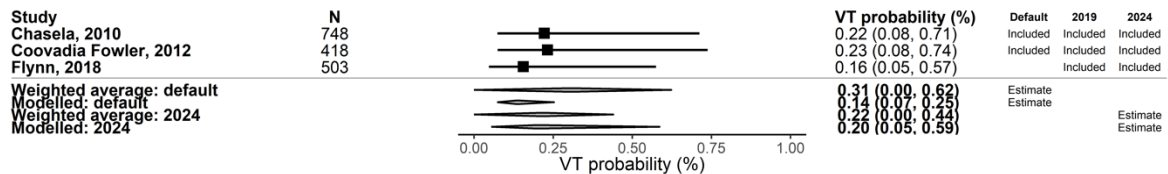

**Figure S4.2.11 Pooled estimates of breastfeeding VT among women receiving Option A.** The following pooled estimates are presented: the weighted average of studies included in the default VT probabilities ('Weighted average: default'), estimates from model two fit to the default studies ('Modelled: default'), the weighted average of studies included in this analysis ('Weighted average: 2024'), and the results of the model two ('Modelled: 2024').

## Model 2: Option B, perinatal

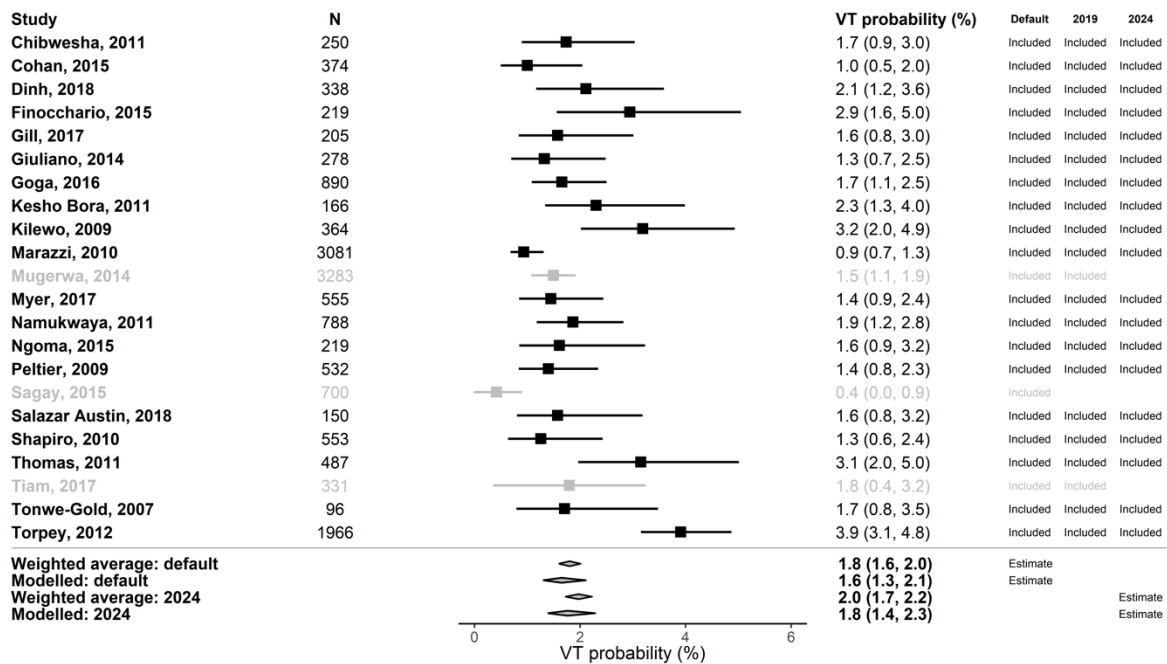

**Figure S4.2.12 Pooled estimates of perinatal VT among women receiving Option B.** The following pooled estimates are presented: the weighted average of studies included in the default VT probabilities ('Weighted average: default'), estimates from model two fit to the default studies ('Modelled: default'), the weighted average of studies included in this analysis ('Weighted average: 2024'), and the results of the model two ('Modelled: 2024'). Mugerwa 2014 and Tiam 2017 were excluded as they were not peer-reviewed studies. Sagay 2015 was excluded as we could not determine the timing of the HIV test.

## Model 2: Option B, breastfeeding

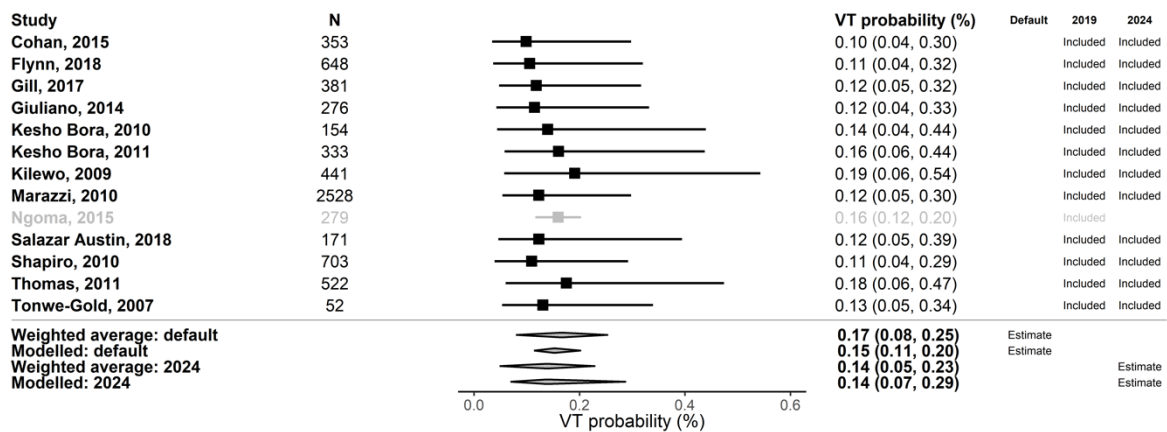

**Figure S4.2.13 Pooled estimates of breastfeeding VT among women receiving Option B.** The following pooled estimates are presented: the weighted average of studies included in the default VT probabilities ('Weighted average: default'), estimates from model two fit to the default studies ('Modelled: default'), the weighted average of studies included in this analysis ('Weighted average: 2024'), and the results of the model two ('Modelled: 2024'). Ngoma 2015 was excluded as it did not restrict to women with CD4 >350.



**Figure S4.2.14 Pooled estimates of perinatal VT among women receiving ART.** The following pooled estimates are presented: the weighted average of studies included in the default VT probabilities ('Weighted average: default'), the weighted average of studies included in this analysis ('Weighted average: 2024'), and the results of the model three ('Modelled: 2024'). Scott 2017 was excluded as we could not determine whether ART initiation occurred before or during pregnancy and Sagay 2015 was excluded as we could not determine paediatric test timing.

**Model 4: Breastfeeding transmission among women on ART**

**A. ART initiated during pregnancy**

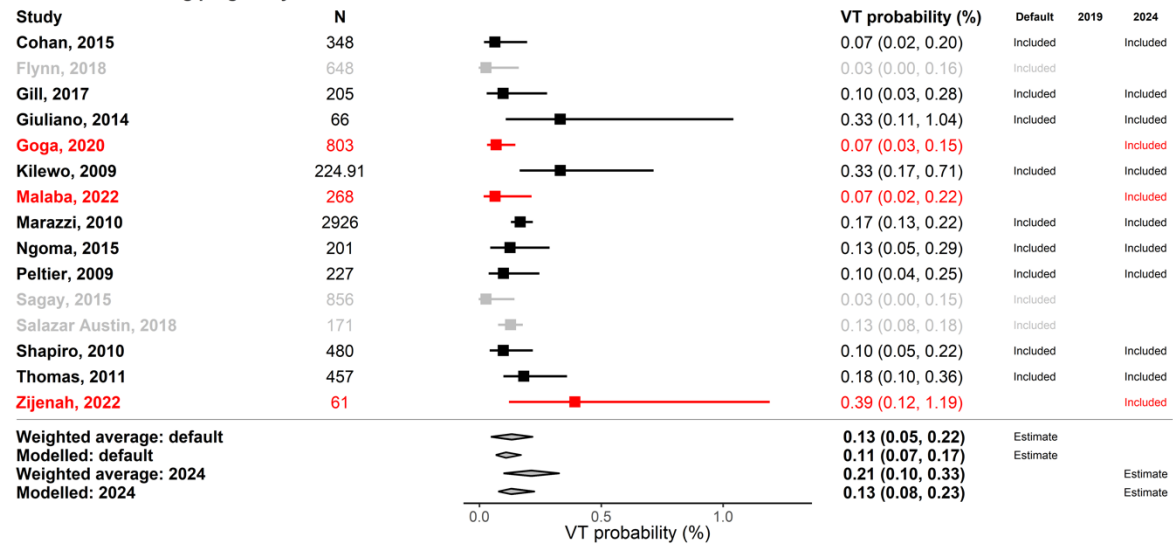

**B. ART initiated preconception**

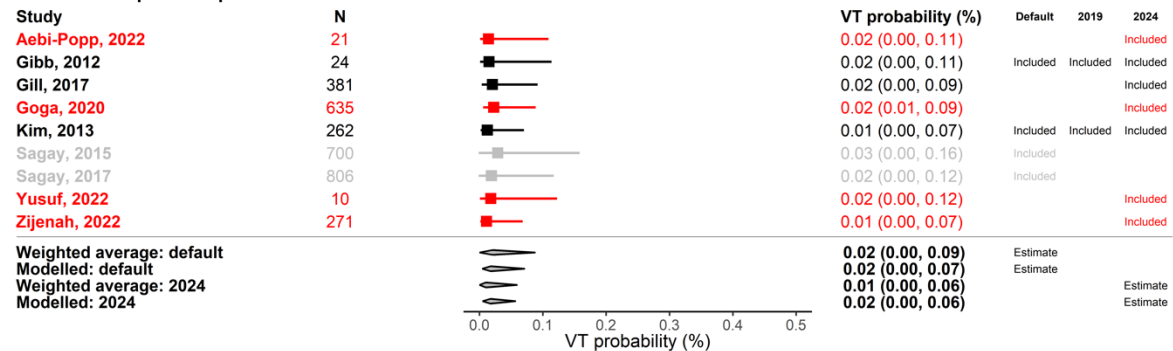

**Figure S4.2.15 Pooled estimates of breastfeeding VT among women receiving ART.** The following pooled estimates are presented: the weighted average of studies included in the default VT probabilities ('Weighted average: default'), estimates from model four fit to the default studies ('Modelled: default'), the weighted average of studies included in this analysis ('Weighted average: 2024'), and the results of the model four ('Modelled: 2024'). Flynn 2018, Sagay 2017, and Salazar Austin 2018 were excluded as we could not determine whether ART initiation occurred before or during pregnancy and Sagay 2015 was excluded as we could not determine paediatric test timing.

## S5. Sensitivity analyses on meta-regression model assumptions

### S5.1. Model one: VT probability from women not receiving PMTCT

Model one included data from 16 studies that reported data about transmissions among women who did not receive PMTCT stratified by CD4 count. This including two new studies published since the 2018 review (Supplementary material S3.1). For the continuous CD4 covariate in model 1, we summarized the CD4 distribution among the study population by the approximate midpoint CD4. Here we assess (1) the sensitivity of model estimates to how the CD4 midpoint was defined from each study and (2) the sensitivity of estimates at different CD4 midpoints.

#### S5.1.1. Sensitivity to CD4 midpoint calculation

Data included in model one reported CD4 among the study population in one of two formats: (1) women with CD4 in a given range (e.g. 200 – 350 mm<sup>3</sup>) or (2) median CD4 of women who did not receive PMTCT care at baseline. If a study reported CD4 as a range, we took the median of the upper and lower bound (e.g. a range of 200-350 was extracted as 275). If a study reported CD4 using the second method (median CD4), the median was extracted.

Studies that stratified participants by CD4 range categories often reported vertical transmission probability data stratified by CD4 range, meaning that one study often reported multiple observations. Among studies that reported perinatal transmission among women not receiving PMTCT, four studies reported transmission by CD4 range. Three of the four studies reported transmission among three CD4 ranges. Nine studies reported perinatal transmission among women not on PMTCT that were not stratified by CD4 range, but did report a median CD4 among the study population. Among studies that reported breastfeeding transmission among women not receiving PMTCT, two studies reported transmission by CD4 range. One of the two studies reported transmission among multiple CD4 ranges. Four studies reported breastfeeding transmission among women not on PMTCT that were not stratified by CD4 range, but did report a median CD4 among the study population. Studies used in model one and method of CD4 reporting are listed in Table S5.1.1.1.

**Table S5.1.1.1.** Studies used in model one and method of CD4 reporting

| Study                  | Location                       | Study years | Transmission type | CD4 | VT   | N   | Method of CD4 reporting |
|------------------------|--------------------------------|-------------|-------------------|-----|------|-----|-------------------------|
| Hoffman, 2010          | South Africa                   | 2004 - 2008 | Perinatal         | 161 | 0.17 | 23  | Median                  |
| Coetzee, 2019          | South Africa                   | 2010 - 2010 | Perinatal         | 272 | 0.13 | 15  | Median                  |
| Goga, 2016             | South Africa                   | 2011 - 2013 | Perinatal         | 372 | 0.13 | 63  | Median                  |
| Olana, 2016            | Ethiopia                       | 2006 - 2014 | Perinatal         | 415 | 0.13 | 102 | Median                  |
| Petra Study Team, 2002 | Tanzania, South Africa, Uganda | 2000 - 2000 | Perinatal         | 435 | 0.13 | 303 | Median                  |

|                               |                                          |             |              |       |      |      |           |
|-------------------------------|------------------------------------------|-------------|--------------|-------|------|------|-----------|
| <b>Habib, 2021</b>            | Iran                                     | 2015 - 2017 | Perinatal    | 475   | 0.20 | 20   | Median    |
| <b>Dabis, 1999</b>            | Ivory Coast, Burkina Faso                | 1995 - 1998 | Perinatal    | 535   | 0.29 | 145  | Median    |
| <b>Connor, 1994</b>           | USA and France                           | 1991 - 1993 | Perinatal    | 538   | 0.22 | 183  | Median    |
| <b>Wiktor, 1999</b>           | Ivory Coast                              | 1996 - 1998 | Perinatal    | 548   | 0.22 | 119  | Median    |
| <b>Marinda, 2011</b>          | Zimbabwe                                 | 1997 - 2000 | Perinatal    | 99.5  | 0.36 | 496  | CD4 range |
| <b>Mayaux, 1995</b>           | France                                   | 1986 - 1994 | Perinatal    | 99.5  | 0.43 | 65   | CD4 range |
| <b>Shaffer, 1999</b>          | Thailand                                 | 1996 - 1997 | Perinatal    | 99.5  | 0.38 | 24   | CD4 range |
| <b>Marinda, 2011</b>          | Zimbabwe                                 | 1997 - 2000 | Perinatal    | 274.5 | 0.24 | 826  | CD4 range |
| <b>Mayaux, 1995</b>           | France                                   | 1986 - 1994 | Perinatal    | 300   | 0.26 | 57   | CD4 range |
| <b>Shaffer, 1999</b>          | Thailand                                 | 1996 - 1997 | Perinatal    | 349.5 | 0.18 | 104  | CD4 range |
| <b>Iloff, 2005</b>            | Zimbabwe                                 | 1997 - 2000 | Perinatal    | 404   | 0.21 | 4367 | CD4 range |
| <b>Marinda, 2011</b>          | Zimbabwe                                 | 1997 - 2000 | Perinatal    | 424.5 | 0.20 | 1963 | CD4 range |
| <b>Mayaux, 1995</b>           | France                                   | 1986 - 1994 | Perinatal    | 600   | 0.17 | 192  | CD4 range |
| <b>Shaffer, 1999</b>          | Thailand                                 | 1996 - 1997 | Perinatal    | 600   | 0.13 | 67   | CD4 range |
| <b>Petra Study Team, 2002</b> | Tanzania, South Africa, Uganda           | 1996 - 2000 | BF (monthly) | 435   | 0.01 | 303  | Median    |
| <b>Chasela, 2010</b>          | Malawi                                   | 2004 - 2010 | BF (monthly) | 442   | 0.01 | 668  | Median    |
| <b>Dabis, 1999</b>            | Ivory Coast, Burkina Faso                | 1995 - 1998 | BF (monthly) | 535   | 0.01 | 113  | Median    |
| <b>Wiktor, 1999</b>           | Ivory Coast                              | 1996 - 1998 | BF (monthly) | 548   | 0.02 | 115  | Median    |
| <b>Kuhn, 2010</b>             | Zambia                                   |             | BF (monthly) | 174.5 | 0.01 | 524  | CD4 range |
| <b>Coovadia Fowler, 2012</b>  | South Africa, Tanzania, Uganda, Zimbabwe | 2008 - 2011 | BF (monthly) | 424.5 | 0.01 | 434  | CD4 range |
| <b>Kuhn, 2010</b>             | Zambia                                   |             | BF (monthly) | 424.5 | 0.00 | 469  | CD4 range |

As these two formats (CD4 range and median CD4) are not directly comparable, we conducted a subgroup analysis to assess the sensitivity of model one results to the difference in method of CD4 reporting. The subgroups we analysed were (1) studies that reported a CD4 range (“CD4 range” model) and (2) studies that reported a CD4 median (“median CD4” model). We re-fit model one to these different subgroups using Equation



S5.1. Model one’s fit to all data as presented in the main text is also copied below (“all data” model).

$$\text{logit}(VT) = \beta_0 * [BF = 0] + \beta_1 * [BF = 1] + \beta_2 * CD4_{\text{Midpoint}} + \beta_3 * BF * CD4_{\text{Midpoint}} + \mu_0 + \mu_1$$

Equation S5.1

The following description of Equation S5.1 is copied from the main text: “*Model one included fixed effects for perinatal ( $\beta_0$ ) and monthly breastfeeding transmission ( $\beta_1$ ), a fixed effect for CD4 midpoint ( $\beta_1$ , per 100 mm<sup>3</sup> centred at 500 mm<sup>3</sup>), and a fixed effect for the interaction between CD4 midpoint and breastfeeding transmission ( $\beta_2$ ). More information on how the CD4 midpoint was extracted from each study is detailed in Supplementary Material S5.1. Random effects were included for study and observation ( $\mu_0$  and  $\mu_1$ , respectively).*”

**Table S5.1.1.2.** Sensitivity analysis is of model 1 results to CD4 midpoint assumption for data used in model one

| Covariate                                                                          | Estimates of the “all data” model (logit) (n = 12,021) |                | Estimates of the “CD4 range” model (logit) (n = 9642) |                | Estimates of the “median CD4” model (logit) (n = 2379) |                |
|------------------------------------------------------------------------------------|--------------------------------------------------------|----------------|-------------------------------------------------------|----------------|--------------------------------------------------------|----------------|
| <b>Intercept</b>                                                                   | -1.61                                                  | (-1.81, -1.41) | -1.57                                                 | (-1.65, -1.48) | -1.47                                                  | (-1.63, -1.30) |
| <b>CD4 midpoint (per 100 cells increase, centered on CD4 = 500 mm<sup>3</sup>)</b> | -0.23                                                  | (-0.28, -0.17) | -0.24                                                 | (-0.29, -0.18) | 0.33                                                   | (0.10, 0.56)   |
| <b>Perinatal transmission (Reference)</b>                                          | 0.0                                                    | (Reference)    | 0.0                                                   | (Reference)    | 0.0                                                    | (Reference)    |
| <b>Breastfeeding transmission</b>                                                  | -3.22                                                  | (-3.84, -2.60) | -4.05                                                 | (-5.33, -2.77) | -2.88                                                  | (-3.58, -2.19) |
| <b>Interaction between CD4 midpoint and breastfeeding transmission</b>             | 0.17                                                   | (-0.21, 0.54)  | -0.08                                                 | (-0.59, 0.43)  | 0.2                                                    | (-0.92, 1.32)  |

The covariates of the “all data” model one and “CD4 range” model one fit had overlapping confidence intervals (Table S5.1.1.2). The “all data” model one and “median CD4” model one fit were significantly different from each other. While the “all data” model one had a negative estimate for the effect of CD4 midpoint on VT probability (-0.2 (-0.3 - -0.2)), the “median CD4” model had a positive estimate for the effect of CD4 midpoint on VT probability (0.4 (0.1-0.7)).

The difference in effect of CD4 midpoint on VT probability among women not receiving PMTCT was driven by three studies that reported both high CD4 medians and transmission rates (Dabis 1999, Connor 1994, and Wiktor 1999, Table S5.1.1.1). Excluding these three studies resulted in a negative CD4 midpoint fixed effect. These studies collected data in the early stage of the HIV epidemic (1991 to 1998 across the three studies), reported high transmission rates and CD4 medians. This may may reflect high incidence among women of childbearing age. In acute HIV infection, both CD4 and viral load are high, and so women with high CD4 can have higher risk of vertical transmission than women no longer in the acute infection stage.<sup>4</sup> Dabis 1999 describes data from the placebo group of the DITRAME trial which had high average CD4 and viral load; among women who transmitted the mean CD4 was 358 and the mean viral load was approximately 55,000.<sup>5</sup> Similar data was not available Connor 1994 and Wiktor 1999.

The observations from these three studies (Dabis, Connor, and Wiktor) represent 31% of the available data in the “median CD4” model and are the only observations with CD4 midpoints above 500. The results of the “median CD4” model are confounded by studies that reflect an earlier HIV epidemic, where transmission probability may be high among high CD4 values due to high incidence rates. When all data is used, the effect of these studies is diluted as there is more data about transmission among women with high CD4 values. The meta-regression framework then imposes larger study and observation level random effects on observations from Dabis 1999, Connor 1994, and Wiktor 1999. Although subgroup analysis shows that model one results are sensitive to the format of CD4 midpoint reporting, the difference in transmission may be confounded by other study characteristics (specifically study year and epidemic stage) rather than due to reporting a CD4 median itself.

### *S5.1.2 Sensitivity to CD4 midpoint used to produce estimates for Spectrum*

For women not receiving PMTCT, Spectrum-AIM stratifies transmission probabilities by CD4 range. These are CD4 <200, 200-350, and >350. To produce model based estimates of VT probabilities compatible with Spectrum-AIM’s stratification, we used CD4 midpoints of 100, 275, and 500 (“Main text value” in Table S5.1.2). We assessed the sensitivity of our estimates to this choice by considering alternate uses of model one that could be used to approximate the Spectrum-AIM CD4 categories. Alternate approaches included: the mean of all transmission probabilities for CD4 midpoints within the Spectrum-AIM ranges (“Mean across range” in Table S5.1.2), the lowest CD4 of the Spectrum-AIM ranges (“Lowest CD4” in Table S5.1.2), and the highest CD4 of the Spectrum-AIM range (“Highest CD4” in Table S5.1.2). For the >350 category, the highest CD4 we considered was 650 mm<sup>3</sup>.

**Table S5.1.2** Sensitivity of model one VT estimates to CD4 midpoint chosen to produce Spectrum-AIM compatible estimates

|                     | <b>CD4 range</b> | <b>Main text value</b> | <b>Mean across range</b> | <b>Lowest CD4</b> | <b>Highest CD4</b> |
|---------------------|------------------|------------------------|--------------------------|-------------------|--------------------|
| <b>Perinatal</b>    | <200             | 33.4 (27.8, 39.0)      | 33.1 (26.0, 41.8)        | 38.8 (32.0, 45.7) | 28.6 (24.0, 32.7)  |
|                     | 200-350          | 25.1 (21.3, 28.5)      | 25.1 (20.0, 30.8)        | 28.6 (24.0, 32.6) | 22.1 (18.8, 25.4)  |
|                     | >350             | 16.7 (13.8, 20.0)      | 16.8 (11.4, 23.2)        | 22.1 (18.8, 25.2) | 12.5 (9.9, 15.7)   |
| <b>BF (monthly)</b> | <200             | 1.1 (0.4, 3.2)         | 1.1 (0.4, 3.5)           | 1.2 (0.3, 4.8)    | 1.0 (0.5, 2.2)     |
|                     | 200-350          | 0.9 (0.5, 1.7)         | 0.9 (0.5, 1.8)           | 1.0 (0.5, 2.2)    | 0.9 (0.5, 1.5)     |
|                     | >350             | 0.80 (0.4, 1.4)        | 0.8 (0.4, 1.5)           | 0.9 (0.5, 1.5)    | 0.7 (0.3, 1.9)     |

Perinatal transmission rates were within a -4.7% to 5.6% absolute difference range of the main text values estimated using the CD4 midpoints of 100, 275, and 500. Breastfeeding transmission rates were within a -0.1% to 0.1% absolute difference range of the main text values. The largest difference was among perinatal transmission with CD4 >350 (Table S5.1.2). The midpoint of 500 produced a transmission probability of 16.7% (13.8–20.0%). The highest CD4 in that range (CD4 = 650) had a transmission rate of 12.5% (9.9%–15.7%) while the lowest CD4 in that range (CD4 = 351) had a transmission rate of 22.1% (18.8–25.2%). If CD4 testing data shows that most women have high CD4 values (> 500), the VT probability used in Spectrum may be overestimating VT. However, given high PMTCT coverage, most women who are exposed to the VT probabilities for women not receiving PMTCT will have been those who were not retained on care. Treatment interruption is associated with rapid decline in CD4 count and increase in viral load after interruption, indicating that VT probability in this group is unlikely to be underestimated.<sup>6</sup>

## S5.2. Model three: perinatal transmission probability from women receiving ART by timing of initiation

Model three included data from 57 studies (Supplementary material S3.3). Here we assess the sensitivity of model three's fit to the calculation used to extract a time on ART midpoint from each study.

### S5.2.1 Sensitivity to time on ART data extraction

Publications reported time on ART before delivery in one of four ways: (1) median or mean number of weeks on ART before delivery, (2) median or mean gestational week of ART initiation, (3) a range of gestational weeks when women initiated ART (either reported as a trimester or through exclusion criteria), and (4) women who were on ART pre-conception.

To maximize the number of studies used, we used all reporting types and attributed a number of "weeks on ART midpoint" for studies where women used lifelong ART during pregnancy. The minimum value accepted was 0.5, indicating that the women initiated ART one week before delivery and the maximum value accepted was 40, indicating that the women initiated ART preconception. We preferentially extracted median (or mean) weeks on ART before delivery or median (mean) gestational week of ART initiation. As described in Supplementary Material S2, for countries that reported time on ART using the third method (a range of weeks), we contacted authors to request a median number of weeks on ART before delivery for the cohort. For the remaining studies where median time on ART was not available and the only information was a range of weeks when women initiated ART, we used the median of this range to determine the weeks on ART midpoint. The method used to derive the weeks on ART is shown for each study used in model three in Table S5.2.1.1.

**Table S5.2.1.1.** Data used to estimate effect of time on ART on VT estimates

| Study            | Location                | Study years | Weeks on ART midpoint | VT events | N    | Method to derive number of weeks on ART <sup>A</sup> |
|------------------|-------------------------|-------------|-----------------------|-----------|------|------------------------------------------------------|
| Bailey, 2011     | Europe                  | 2000 - 2009 | 1                     | 5         | 41   | 3                                                    |
| Delicio, 2011    | Brazil                  | 2000 - 2009 | 1                     | 2         | 12   | 3                                                    |
| Chibwasha, 2011  | Zambia                  | 2007 - 2010 | 2                     | 17        | 187  | 3                                                    |
| Coetzee, 2019    | South Africa            | 2010 - 2010 | 2                     | 0         | 11   | 3                                                    |
| Hoffman, 2010    | South Africa            | 2004 - 2008 | 2                     | 14        | 151  | 3                                                    |
| Scott, 2017      | USA                     | 2002 - 2009 | 2                     | 2         | 44   | 3                                                    |
| Tubiana, 2013    | France                  | 2007 - 2010 | 3.2                   | 1         | 36   | 1                                                    |
| Thomas, 2011     | Kenya                   | 2003 - 2009 | 5                     | 20        | 487  | 3                                                    |
| Choi, 2018       | Korea                   | 2005 - 2017 | 6                     | 0         | 3    | 3                                                    |
| Gantner, 2019    | France                  | 2008 - 2014 | 6                     | 0         | 16   | 3                                                    |
| Goga, 2016       | South Africa            | 2011 - 2013 | 6                     | 2         | 163  | 3                                                    |
| Malaba, 2018     | South Africa And Uganda | 2022 - 2018 | 6                     | 3         | 135  | 3                                                    |
| Malaba, 2018     | South Africa And Uganda | 2022 - 2018 | 6                     | 0         | 133  | 3                                                    |
| Mandelbrot, 2015 | France                  | 2000 - 2011 | 6                     | 21        | 990  | 3                                                    |
| Meyers, 2015     | China                   | 2010 - 2012 | 6                     | 11        | 248  | 3                                                    |
| Siubiude, 2017   | France                  | 2000 - 2023 | 6                     | 36        | 2152 | 3                                                    |
| Tookey, 2016     | UK                      | 2003 - 2013 | 6                     | 13        | 640  | 3                                                    |
| Zijenah, 2022    | Zimbabwe                | 2017 - 2018 | 6                     | 2         | 56   | 3                                                    |

|                                   |                                                                   |             |      |    |      |   |
|-----------------------------------|-------------------------------------------------------------------|-------------|------|----|------|---|
| <b>Gill, 2017</b>                 | Rwanda                                                            | 2013 - 2014 | 9.6  | 3  | 205  | 1 |
| <b>Joao, 2021</b>                 | Argentina, Brazil,<br>South Africa,<br>Tanzania,<br>Thailand, USA | 2013 - 2018 | 11.5 | 7  | 393  | 3 |
| <b>Nlend, 2013</b>                | Cameroon                                                          | 2012 - 2008 | 12   | 5  | 285  | 1 |
| <b>Black, 2008</b>                | South Africa                                                      | 2004 - 2007 | 13   | 1  | 302  | 2 |
| <b>Chen, 2019</b>                 | China                                                             | 2007 - 2015 | 13   | 19 | 446  | 3 |
| <b>Prieto, 2012</b>               | Spain                                                             | 2000 - 2007 | 13   | 5  | 244  | 3 |
| <b>Dryden-<br/>Peterson, 2011</b> | Botswana                                                          | 2009 - 2010 | 13.1 | 1  | 114  | 2 |
| <b>Bornhede, 2018</b>             | Sweden                                                            | 2014 - 2017 | 14   | 0  | 3    | 3 |
| <b>Giuliano, 2014</b>             | Malawi                                                            | 2008 - 2009 | 14   | 2  | 278  | 2 |
| <b>Townsend, 2014</b>             | UK and Ireland                                                    | 2007 - 2011 | 17.3 | 21 | 3422 | 2 |
| <b>Perry, 2016</b>                | UK                                                                | 2007 - 2012 | 17.9 | 1  | 306  | 2 |
| <b>Carey, 2018</b>                | UK                                                                | 2008 - 2014 | 18   | 0  | 67   | 2 |
| <b>Harrington, 2019</b>           | Malawi                                                            | 2015 - 2016 | 18   | 7  | 264  | 2 |
| <b>Ngoma, 2015</b>                | Zambia                                                            | 2008 - 2009 | 18   | 3  | 219  | 3 |
| <b>Cohan, 2015</b>                | Uganda                                                            | 2009 - 2013 | 18.8 | 1  | 374  | 2 |
| <b>Perry, 2016</b>                | UK                                                                | 2007 - 2012 | 19.6 | 1  | 187  | 2 |
| <b>Amone, 2016</b>                | Uganda                                                            | 2017 - 2023 | 20   | 7  | 431  | 3 |
| <b>Choi, 2018</b>                 | Korea                                                             | 2005 - 2017 | 20   | 0  | 3    | 3 |
| <b>Goga, 2016</b>                 | South Africa                                                      | 2011 - 2013 | 20   | 14 | 727  | 3 |
| <b>Loh, 2021</b>                  | Singapore                                                         | 2008 - 2015 | 20   | 0  | 42   | 3 |
| <b>Mandelbrot,<br/>2015</b>       | France                                                            | 2000 - 2011 | 20   | 22 | 2619 | 3 |
| <b>Myer, 2017</b>                 | South Africa                                                      | 2013 - 2014 | 20   | 7  | 555  | 2 |
| <b>Ndarukwa, 2019</b>             | Zimbabwe                                                          | 2014 - 2016 | 20   | 13 | 841  | 3 |
| <b>Siubiude, 2017</b>             | France                                                            | 2000 - 2023 | 20   | 31 | 4147 | 3 |
| <b>Tiam, 2019</b>                 | Lesotho                                                           | 2014 - 2016 | 20   | 5  | 370  | 3 |
| <b>Tookey, 2016</b>               | UK                                                                | 2003 - 2013 | 20   | 13 | 2155 | 3 |
| <b>Zijenah, 2022</b>              | Zimbabwe                                                          | 2017 - 2018 | 20   | 2  | 106  | 3 |
| <b>Marazzi, 2010</b>              | Malawi and<br>Mozambique                                          | 2005 - 2009 | 20.1 | 25 | 3081 | 2 |
| <b>Bailey, 2011</b>               | Europe                                                            | 2000 - 2009 | 21   | 19 | 1719 | 3 |
| <b>Chibwasha, 2011</b>            | Zambia                                                            | 2007 - 2010 | 22   | 42 | 1626 | 3 |
| <b>Coetzee, 2019</b>              | South Africa                                                      | 2010 - 2010 | 22   | 0  | 33   | 3 |
| <b>Hoffman, 2010</b>              | South Africa                                                      | 2004 - 2008 | 22   | 28 | 579  | 3 |
| <b>Van Schalkwyk,<br/>2013</b>    | South Africa                                                      | 2008 - 2010 | 24   | 1  | 127  | 3 |
| <b>Meyers, 2015</b>               | China                                                             | 2010 - 2012 | 26   | 5  | 946  | 3 |
| <b>Choi, 2018</b>                 | Korea                                                             | 2005 - 2017 | 34   | 0  | 2    | 3 |
| <b>Mandelbrot,<br/>2015</b>       | France                                                            | 2000 - 2011 | 34   | 3  | 658  | 3 |
| <b>Siubiude, 2017</b>             | France                                                            | 2000 - 2023 | 34   | 6  | 1149 | 3 |
| <b>Tookey, 2016</b>               | UK                                                                | 2003 - 2013 | 34   | 0  | 110  | 3 |
| <b>Zijenah, 2022</b>              | Zimbabwe                                                          | 2017 - 2018 | 34   | 0  | 17   | 3 |
| <b>Aebi-Popp, 2022</b>            | Switzerland                                                       | 2019 - 2021 | 40   | 0  | 17   | 4 |
| <b>Blonk, 2015</b>                | Europe                                                            | 2010 - 2014 | 40   | 0  | 7    | 4 |
| <b>Bornhede, 2018</b>             | Sweden                                                            | 2014 - 2017 | 40   | 0  | 10   | 4 |
| <b>Carey, 2018</b>                | UK                                                                | 2008 - 2014 | 40   | 0  | 65   | 4 |
| <b>Chauhan, 2021</b>              | India                                                             | 2016 - 2018 | 40   | 0  | 32   | 4 |
| <b>Choi, 2018</b>                 | Korea                                                             | 2005 - 2017 | 40   | 0  | 8    | 4 |
| <b>Coetzee, 2019</b>              | South Africa                                                      | 2010 - 2010 | 40   | 0  | 25   | 4 |
| <b>Colbers, 2015a</b>             | Europe                                                            |             | 40   | 0  | 18   | 4 |
| <b>Colbers, 2015</b>              | Europe                                                            | 2009 - 2014 | 40   | 0  | 11   | 4 |
| <b>Dinh, 2018</b>                 | Zimbabwe                                                          | 2013 - 2013 | 40   | 5  | 415  | 4 |

|                                |                     |             |    |   |      |   |
|--------------------------------|---------------------|-------------|----|---|------|---|
| <b>Dryden-Peterson, 2011</b>   | Botswana            | 2009 - 2010 | 40 | 0 | 144  | 4 |
| <b>Ewenighi-Amankwah, 2020</b> | Nigeria             |             | 40 | 0 | 122  | 4 |
| <b>Frangé, 2020</b>            | France              | 2010 - 2018 | 40 | 0 | 247  | 4 |
| <b>Gantner, 2019</b>           | France              | 2008 - 2014 | 40 | 0 | 78   | 4 |
| <b>Gibb, 2012</b>              | Uganda,<br>Zimbabwe | 2003 - 2009 | 40 | 0 | 172  | 4 |
| <b>Gill, 2017</b>              | Rwanda              | 2014 - 2016 | 40 | 1 | 382  | 4 |
| <b>Goga, 2020</b>              | South Africa        | 2012 - 2014 | 40 | 7 | 635  | 4 |
| <b>Hoffman, 2010</b>           | South Africa        | 2004 - 2008 | 40 | 1 | 143  | 4 |
| <b>Huntington, 2011</b>        | UK                  | 1996 - 2009 | 40 | 1 | 340  | 4 |
| <b>Kim, 2013</b>               | Malawi              | 2009 - 2011 | 40 | 0 | 262  | 4 |
| <b>Loh, 2021</b>               | Singapore           | 2008 - 2015 | 40 | 0 | 46   | 4 |
| <b>Mandelbrot, 2015</b>        | France              | 2000 - 2011 | 40 | 6 | 3505 | 4 |
| <b>Ndarukwa, 2019</b>          | Zimbabwe            | 2014 - 2016 | 40 | 4 | 289  | 4 |
| <b>Orbaek, 2017</b>            | Denmark             | 2002 - 2014 | 40 | 0 | 247  | 4 |
| <b>Perry, 2016</b>             | UK                  | 2007 - 2012 | 40 | 0 | 178  | 4 |
| <b>Peters, 2017</b>            | UK                  | 2012 - 2014 | 40 | 3 | 1749 | 4 |
| <b>Sagay, 2015</b>             | Nigeria             | 2010 - 2012 | 40 | 3 | 700  | 4 |
| <b>Samuel, 2014</b>            | UK                  | 2004 - 2010 | 40 | 1 | 68   | 4 |
| <b>Schalkwijk, 2017</b>        | Europe              | -           | 40 | 0 | 15   | 4 |
| <b>Siubiude, 2017</b>          | France              | 2000 - 2023 | 40 | 9 | 6606 | 4 |
| <b>Tiam, 2019</b>              | Lesotho             | 2014 - 2016 | 40 | 1 | 249  | 4 |
| <b>Tookey, 2016</b>            | UK                  | 2003 - 2013 | 40 | 4 | 968  | 4 |
| <b>Townsend, 2014</b>          | UK and Ireland      | 2007 - 2011 | 40 | 4 | 2105 | 4 |
| <b>Yusuf, 2022</b>             | USA                 | -           | 40 | 0 | 1    | 4 |
| <b>Zijenah, 2022</b>           | Zimbabwe            | 2017 - 2018 | 40 | 1 | 272  | 4 |

<sup>A</sup> (1) Reported median or mean weeks on ART before delivery

(2) Reported median or mean gestational week of ART initiation

(3) Reported a range of gestational weeks during which women initiated ART

(4) Reported women who were on ART pre-conception

As these two formats are not directly comparable, we conducted a subgroup analysis to assess the sensitivity of model three results to the difference in method for extracting the “weeks on ART midpoint”. The subgroups we analysed were (1) studies that reported a median number of weeks on ART before delivery, studies that reported ART was initiated in the last four weeks of pregnancy, and transmission among women on ART preconception (methods one, two, and four above, “Median weeks reported” below) and (2) studies that reported a range of gestational weeks when women initiated ART or transmission among women on ART preconception (methods three and four above, “Range of weeks reported” below). We re-fit model three to these different subgroups using Equation S5.2. Model one’s fit to all data as presented in the main text is also copied below (“All data” model).

$$\text{logit}(PVT) = \beta_0 + \beta_1 * T_{weeks} + \beta_2 * \text{late initiation} + \mu_0 + \mu_1$$

Equation S5.2

The following description of Equation S5.2 is copied from the main text: “*Model three included a fixed intercept term ( $\beta_0$ ), a fixed effect ( $\beta_1$ ) for weeks on ART during pregnancy before delivery ( $T_{Weeks}$ , centred on ART initiated 20 weeks before delivery), and a fixed effect for late ART initiation ( $\beta_2$ , ART initiated less than four weeks before delivery). Where available, we extracted the median number of weeks on ART before delivery. Assumptions*

surrounding weeks on ART before delivery are outlined in Supplementary Material S5.2. Random effects were included for study and observation ( $\mu_0$  and  $\mu_1$ , respectively)."

**Table S5.2.1.2.** Sensitivity analysis is of model three results to time on ART midpoint assumption

| Covariate                                           | Estimates of the "All data" model (logit) (n = 55,240) |                | Estimates of the "Median weeks reported" model (logit) (n = 30,479) |                | Estimates of the "Range of weeks reported" model (logit) (n = 45,351) |                |
|-----------------------------------------------------|--------------------------------------------------------|----------------|---------------------------------------------------------------------|----------------|-----------------------------------------------------------------------|----------------|
| Intercept                                           | -4.55                                                  | (-4.77, -4.33) | -4.82                                                               | (-5.14, -4.51) | -4.42                                                                 | (-4.67, -4.17) |
| Weeks on ART before delivery (centered on 20 weeks) | -0.06                                                  | (-0.07, -0.04) | -0.05                                                               | (-0.07, -0.03) | -0.06                                                                 | (-0.07, -0.05) |
| Late ART initiation (<4 weeks before delivery)      | 0.65                                                   | (-0.06, 1.35)  | 1.49                                                                | (0.67, 2.31)   | 0.57                                                                  | (-0.14, 1.29)  |

The "all data" model three and "range of weeks reported" model three fit were not significantly different from each other (Table S5.2.1.2). The "all data" model three and "median weeks reported" model three fit were significantly different from each other. The late ART initiation covariate was significantly positive in the "median weeks reported" model, whereas in the "all data" model it was positive, but not significant.

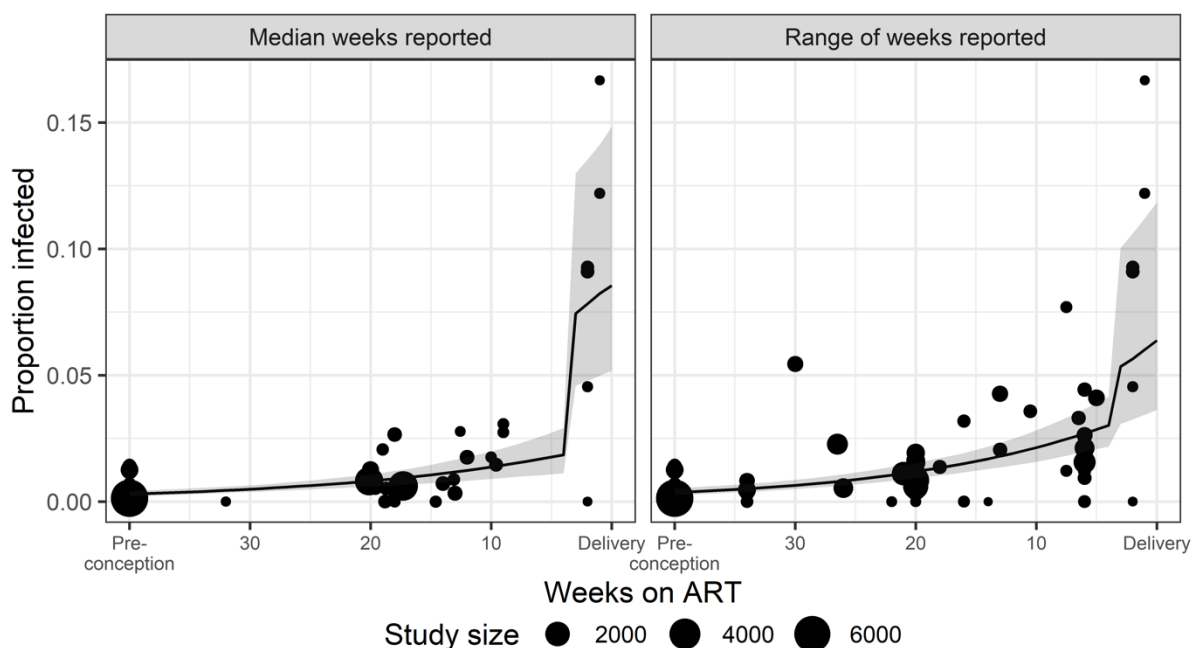

**Figure S5.2.1.** Effect of definition of weeks on ART midpoint on model three estimates of perinatal VT probability

The "all data" and "range of weeks reported" models included more studies where women initiated ART in the final ten weeks of pregnancy. These studies had VT probabilities ranging

from 0% to approximately 7.5%, making it so that the studies with late ART initiation weren't significantly higher than what was captured in the "weeks on ART" covariate.

### S5.3 Geographic region as a confounder of ART class's effect on VT probability

Because 9/12 studies that reported perinatal transmission among women receiving an INSTI-based regimen occurred in high-income countries, we assessed geographic region as a confounder of ART class's effect on VT probability. To do so, we fit a modified version of model three, with fixed effects on ART class and geographic region. Geographic region was coded as: Sub-Saharan Africa (SSA, reference), non SSA, or multiple regions.

**Table S5.3.** Geographic region as a potential confounder for ART class's effect on VT probability

| Covariate                                                  | No geographic region fixed effect |                         | Geographic region fixed effect |                         |
|------------------------------------------------------------|-----------------------------------|-------------------------|--------------------------------|-------------------------|
|                                                            | Estimate (logit)                  | 95% confidence interval | Estimate (logit)               | 95% confidence interval |
| <b>Intercept</b>                                           | -4.45                             | (-4.70, -4.19)          | -4.27                          | (-4.52, -4.01)          |
| <b>Weeks on ART before delivery (centered on 20 weeks)</b> | -0.06                             | (-0.07, -0.04)          | -0.05                          | (-0.07, -0.04)          |
| <b>Late ART initiation (&lt;4 weeks before delivery)</b>   | 0.67                              | (-0.03, 1.38)           | 0.89                           | (-0.02, 1.81)           |
| <b>ART class</b>                                           |                                   |                         |                                |                         |
| <b>NNRTI (reference)</b>                                   | 0.00                              | (Reference)             | 0.00                           | (Reference)             |
| <b>INSTI</b>                                               | -1.04                             | (-1.97, -0.11)          | -0.84                          | (-1.84, 0.17)           |
| <b>PI</b>                                                  | -0.10                             | (-0.51, 0.32)           | 0.02                           | (-0.43, 0.47)           |
| <b>Miscellaneous regimens</b>                              | -0.07                             | (-0.64, 0.51)           | 0.16                           | (-0.45, 0.77)           |
| <b>Geographic region</b>                                   |                                   |                         |                                |                         |
| <b>SSA</b>                                                 |                                   | Not included            | 0.00                           | (Reference)             |
| <b>Non-SSA</b>                                             |                                   |                         | -0.51                          | (-1.07, 0.04)           |
| <b>Multiple regions</b>                                    |                                   |                         | -0.26                          | (-1.17, 0.66)           |

In the model that included geographic region, the non-SSA region had the lowest VT probability when a NNRTI-based regimen was initiated 20 weeks before delivery, although the regions didn't differ significantly (Table S5.3). While in the model without geographic region specified INSTI-based regimens had significantly lower VT when ART was started 20 weeks before delivery, including geographic region in the mode made this effect not significant. This suggests that the effects of ART regimen class on perinatal VT are confounded by the study geographic region.

## S6. Implications of estimated VT probabilities for Spectrum-AIM's estimates of paediatric HIV infections

We used our estimates of VT probability in Spectrum-AIM model to assess the change in the number of perinatal and breastfeeding infections compared to those calculated using the default VT probabilities. For women not receiving any treatment, we used model one to estimate VT probability at the following CD4 midpoints: 100, 275, and 500. These were used to align with the Spectrum-AIM CD4 categories of <200, 200-350, and >350. For women receiving lifelong ART, we used model three to estimate perinatal VT for weeks on ART of 2, 20, and 40 weeks to represent the Spectrum-AIM's perinatal transmission categories of on ART of <4 weeks, for 4-39 weeks before delivery, and preconception. For breastfeeding transmission probabilities, we used model four to estimate a monthly breastfeeding VT probability for women who initiated ART preconception and women who initiated ART during pregnancy. Probabilities of VT for women who seroconverted during pregnancy or breastfeeding and women who received short-course PMTCT were estimated using model two. The values used in this analysis are listed in Table 1 and Table 2 of the main text.

Using the 2024 published publicly available Spectrum-AIM files for Malawi, Rwanda, Democratic Republic of the Congo, and Burkina Faso, we calculated the percent change in the number of perinatal infections (Equation S6.1), breastfeeding infections (Equation S6.2), and total paediatric infections (Equation S6.3) in the years 2000, 2010, 2015, and 2023. These countries were chosen as they represent a country in Southern, Eastern, Central, and Western Africa respectively, and these years represent a variety of PMTCT strategies and coverages.

$$Percent\ change_{Perinatal} = \frac{(Infections_{Perinatal,MR} - Infections_{Perinatal,Default})}{Infections_{Perinatal,Default}} * 100$$

Equation S6.1

In Equation S6.1,  $Infections_{Perinatal,MR}$  represented the number of perinatal infections that resulted from using the VT probabilities estimated in the meta-regression analysis,  $Infections_{Perinatal,Default}$  represented the number of perinatal infections that resulted from using the default Spectrum-AIM VT probabilities, and  $Percent\ change_{Perinatal}$  represented the percent change in perinatal infections.

$$Percent\ change_{BF} = \frac{(Infections_{BF,MR} - Infections_{BF,Default})}{Infections_{BF,Default}} * 100$$

Equation S6.2

In Equation S6.2,  $Infections_{BF,MR}$  represented the number of breastfeeding infections that resulted from using the VT probabilities estimated in the meta-regression analysis,  $Infections_{BF,Default}$  represented the number of breastfeeding infections that resulted from using the default Spectrum-AIM VT probabilities, and  $Percent\ change_{BF}$  represented the percent change in breastfeeding infections.

$$Percent\ change_{Total} = \frac{(Infections_{Total,MR} - Infections_{Total,Default})}{Infections_{Total,Default}} * 100$$

Equation S6.3



In Equation S6.3,  $Infections_{Total,MR}$  represented the number of vertical infections that resulted from using the VT probabilities estimated in the meta-regression analysis,  $Infections_{Total,Default}$  represented the number of vertical infections that resulted from using the default Spectrum-AIM VT probabilities, and  $Percent\ change_{Total}$  represented the percent change in vertical infections.

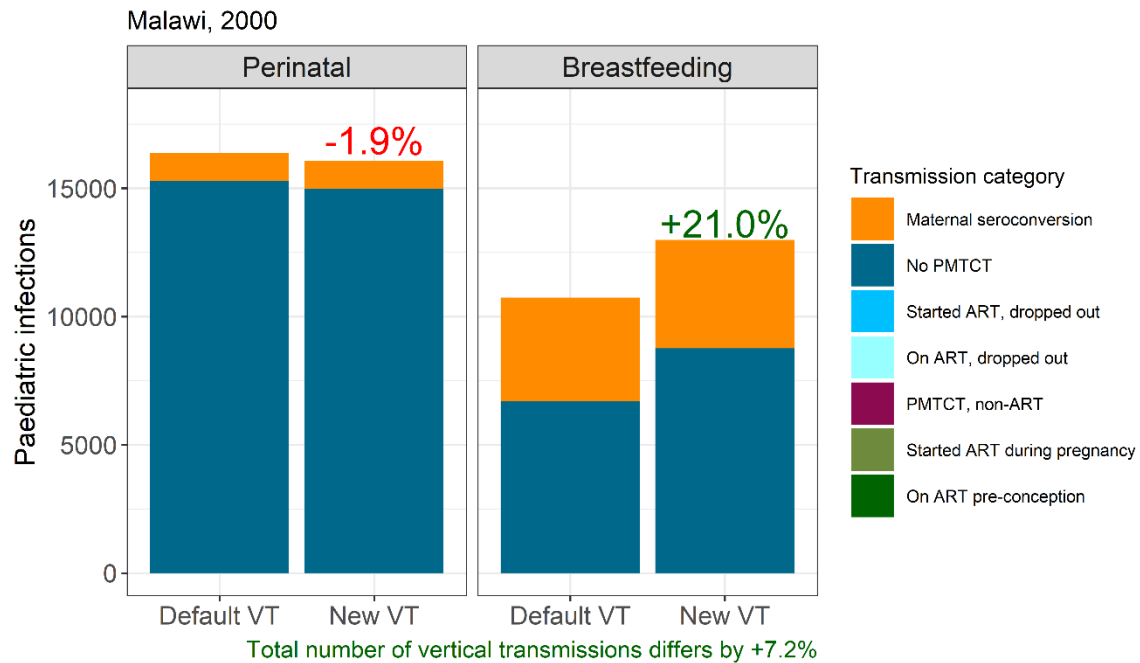

**Figure S6.1.** Change in vertical infections due to estimated vertical transmission probabilities by infection timing, Malawi 2000

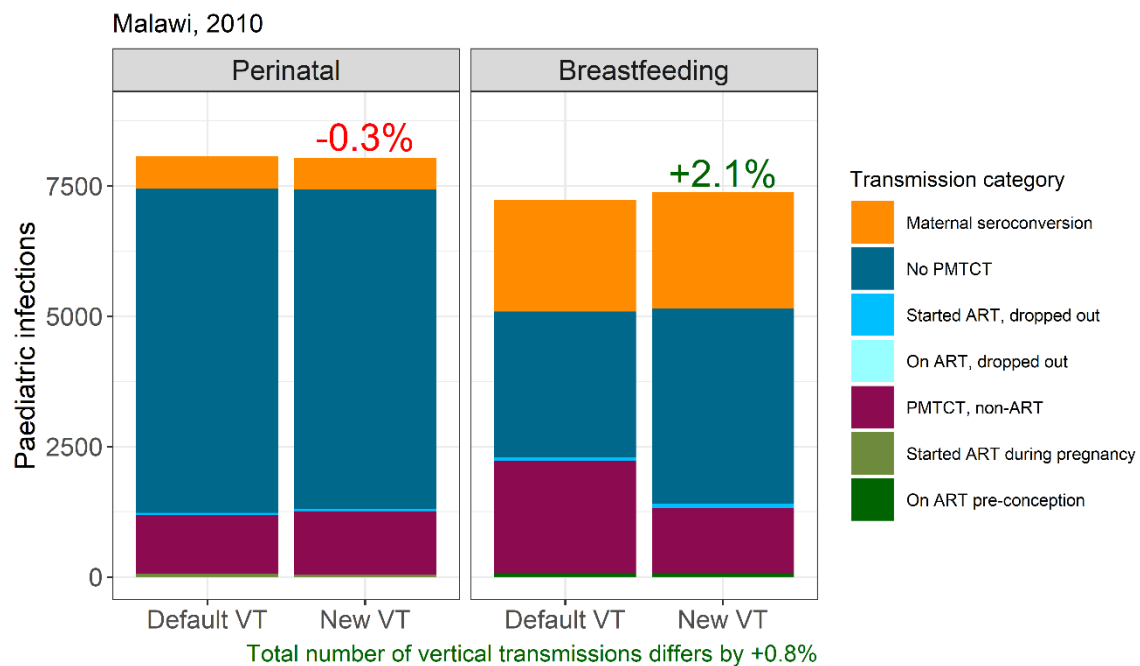

**Figure S6.2.** Change in vertical infections due to estimated vertical transmission probabilities by infection timing, Malawi 2010

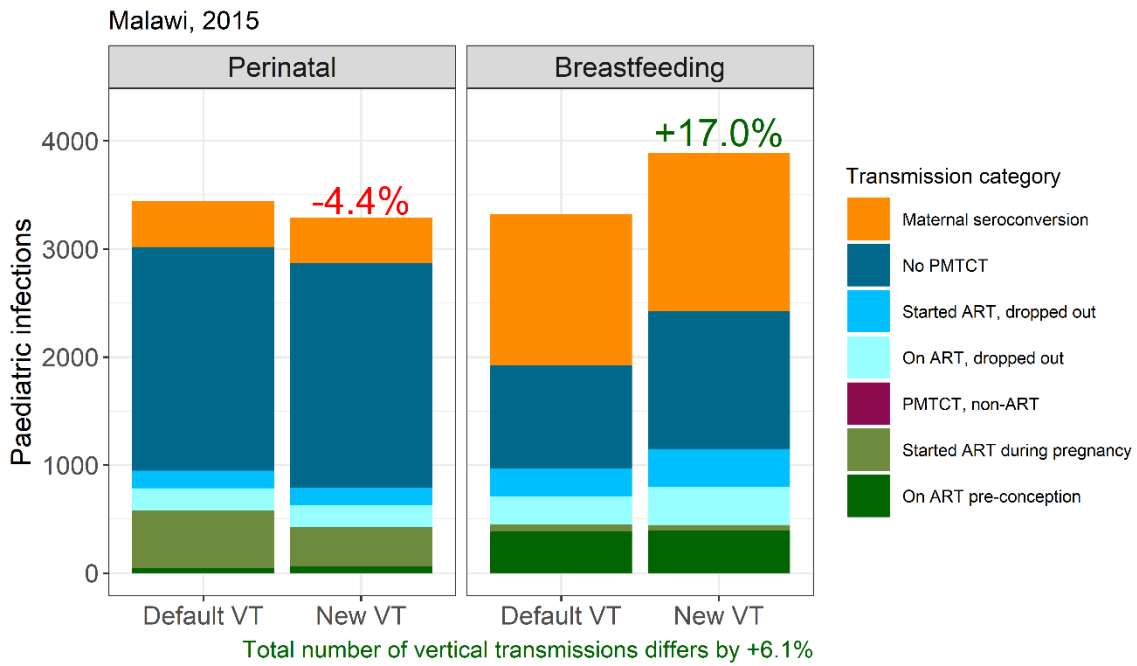

**Figure S6.3.** Change in vertical infections due to estimated vertical transmission probabilities by infection timing, Malawi 2015

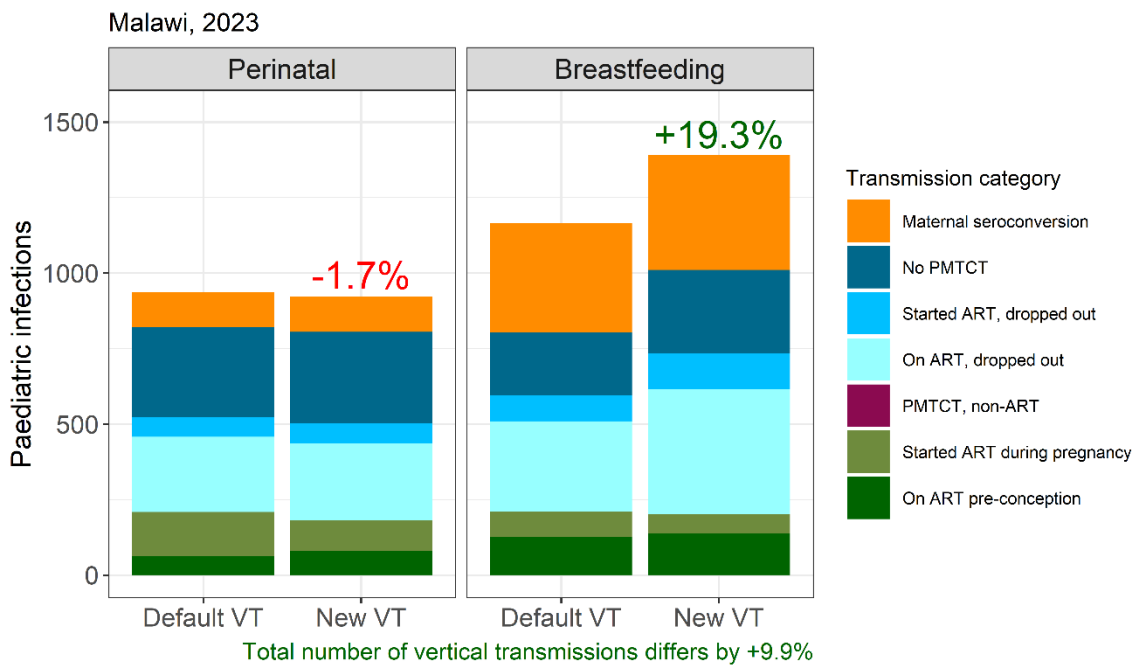

**Figure S6.4.** Change in vertical infections due to estimated vertical transmission probabilities by infection timing, Malawi 2023

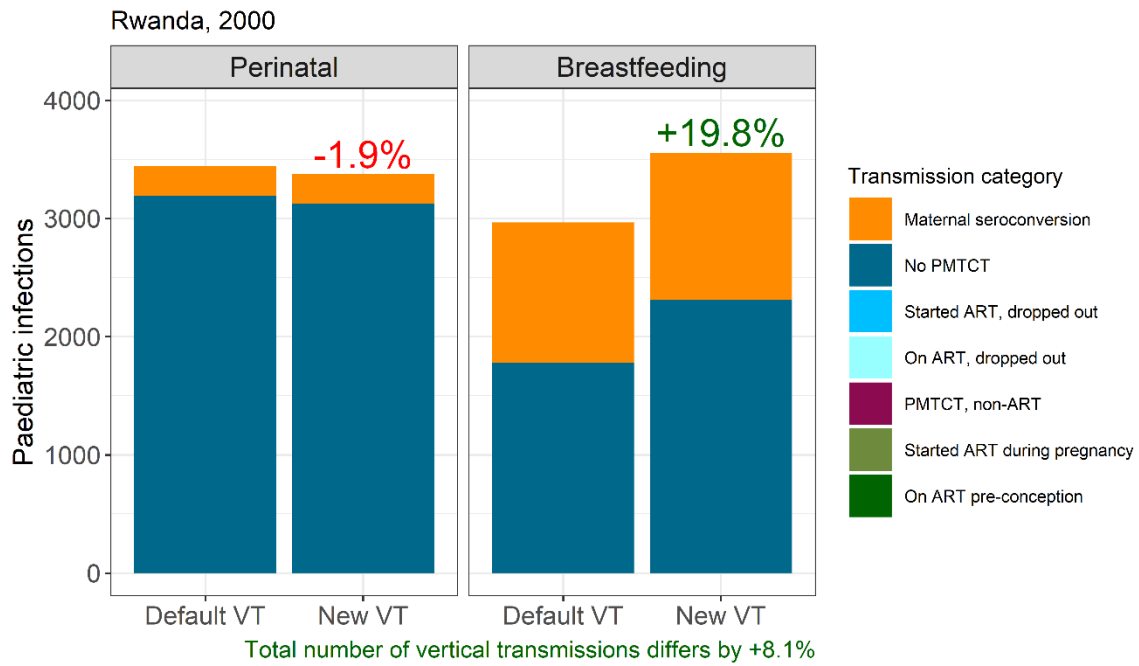

**Figure S6.5.** Change in vertical infections due to estimated vertical transmission probabilities by infection timing, Rwanda 2000

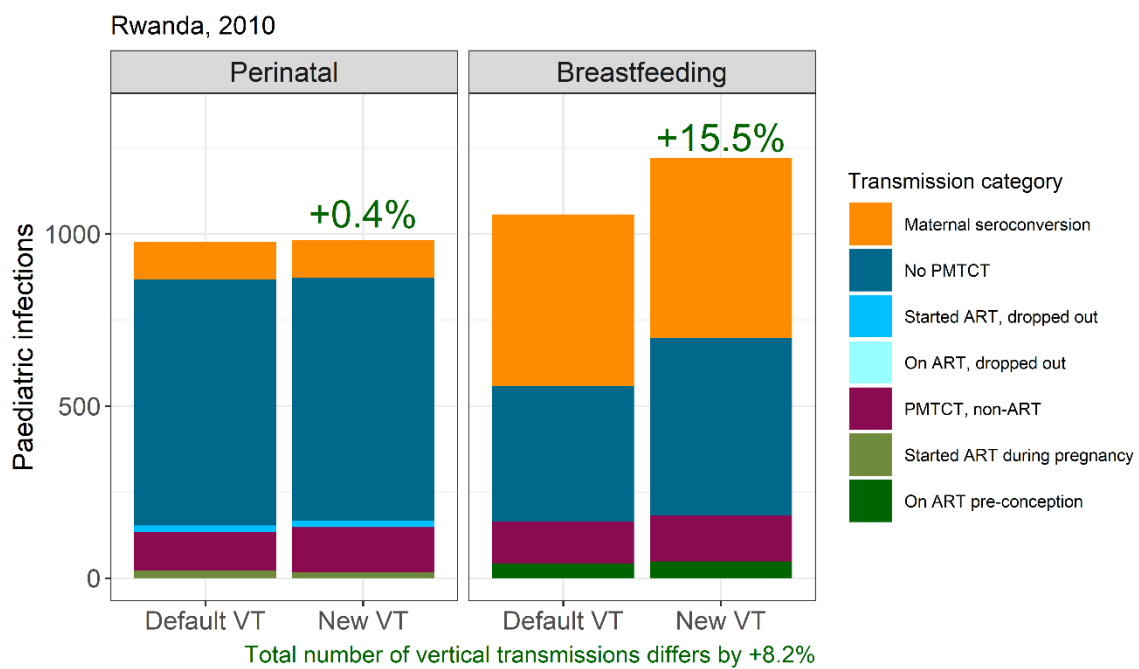

**Figure S6.6.** Change in vertical infections due to estimated vertical transmission probabilities by infection timing, Rwanda 2010

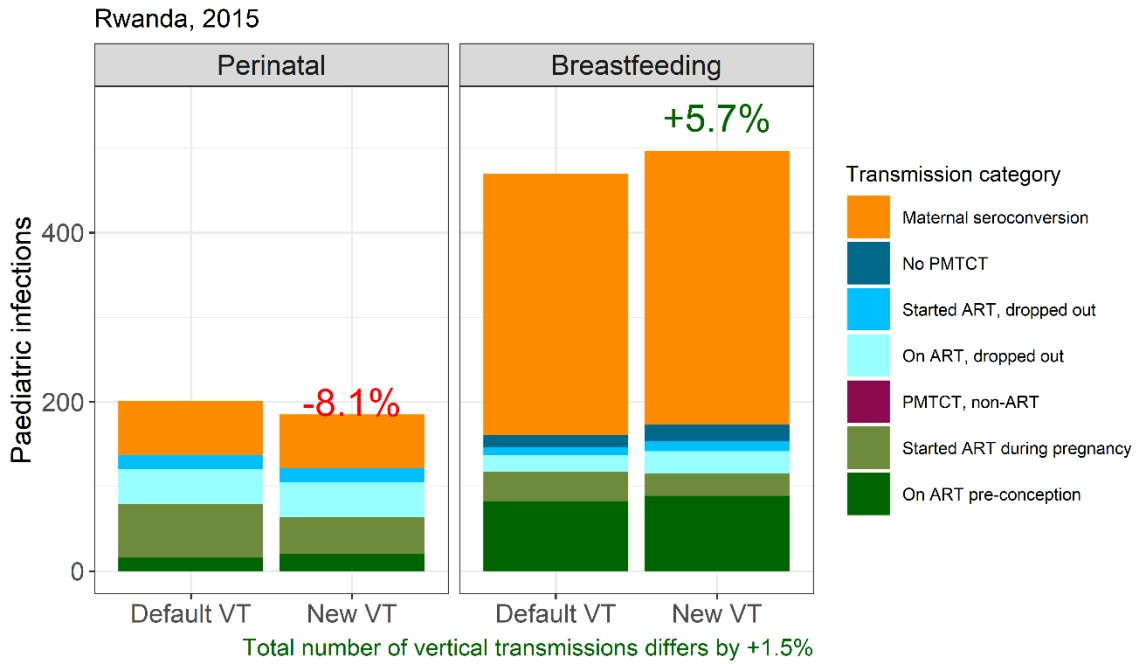

**Figure S6.7.** Change in vertical infections due to estimated vertical transmission probabilities by infection timing, Rwanda 2015

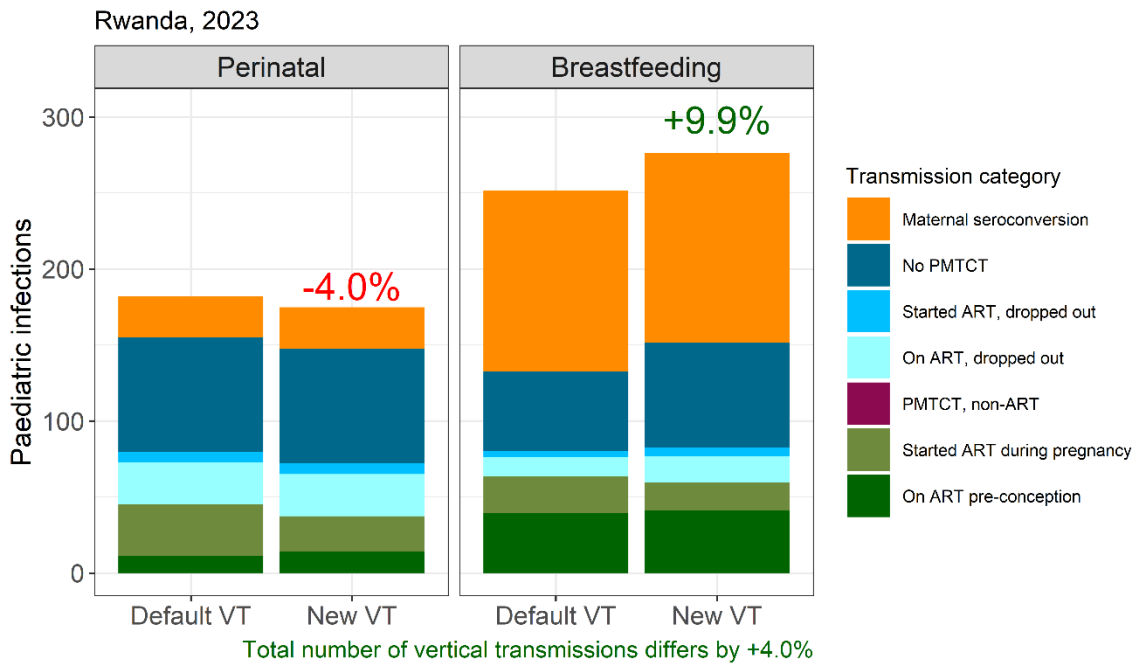

**Figure S6.8.** Change in vertical infections due to estimated vertical transmission probabilities by infection timing, Rwanda 2023

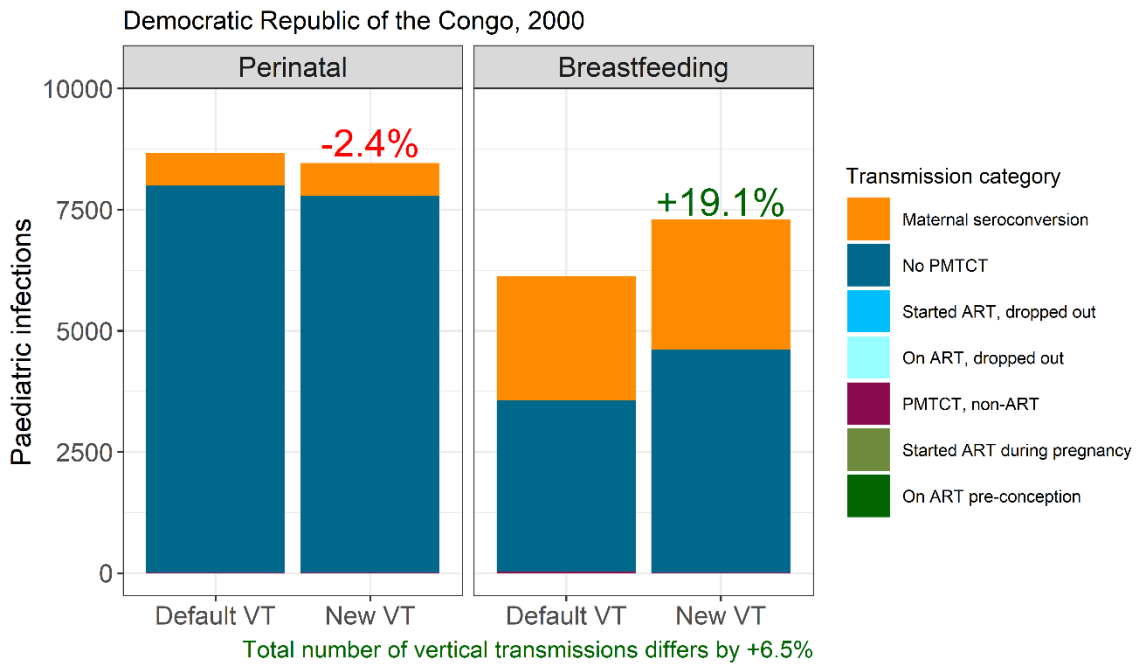

**Figure S6.9.** Change in vertical infections due to estimated vertical transmission probabilities by infection timing, Democratic Republic of the Congo 2000

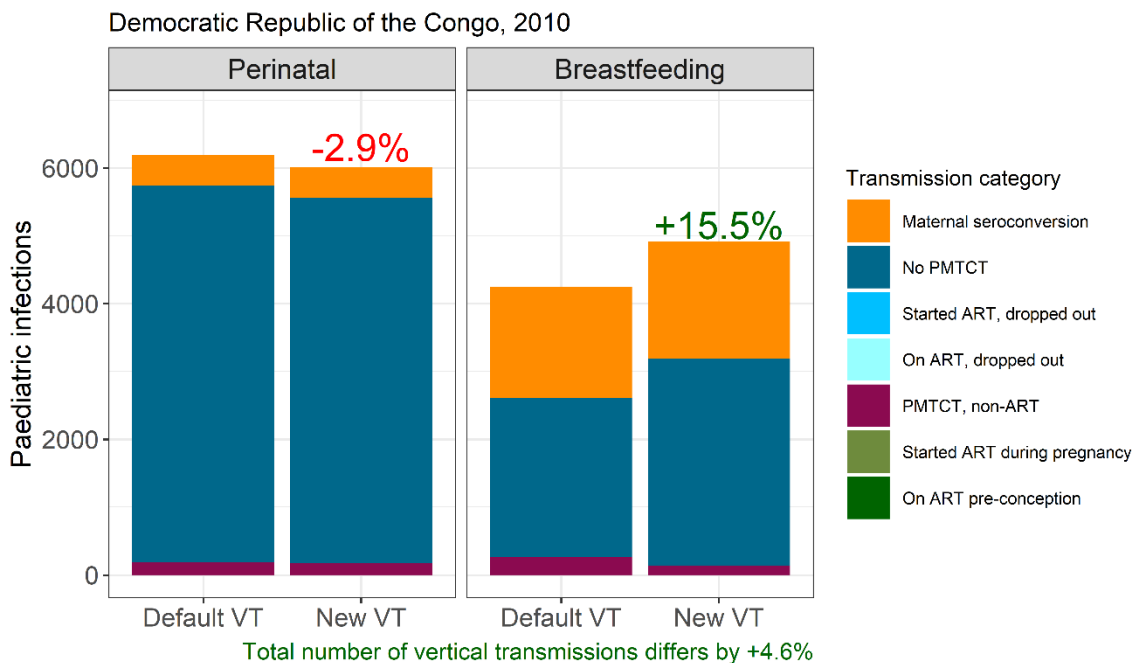

**Figure S6.10.** Change in vertical infections due to estimated vertical transmission probabilities by infection timing, Democratic Republic of the Congo 2010

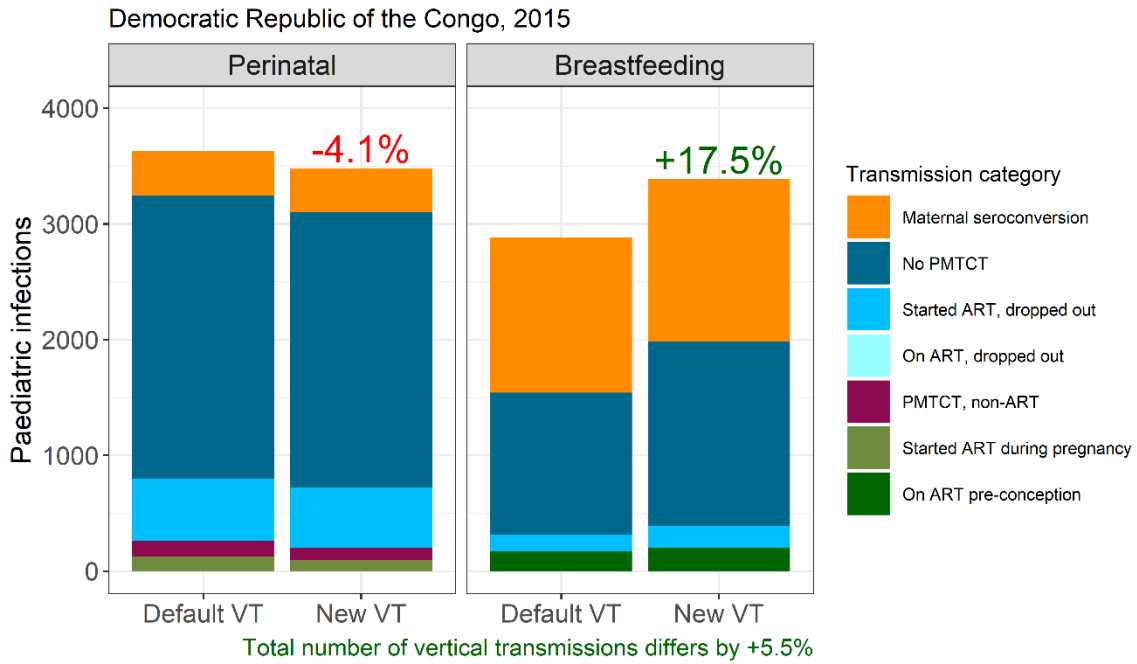

**Figure S6.11.** Change in vertical infections due to estimated vertical transmission probabilities by infection timing, Democratic Republic of the Congo 2015

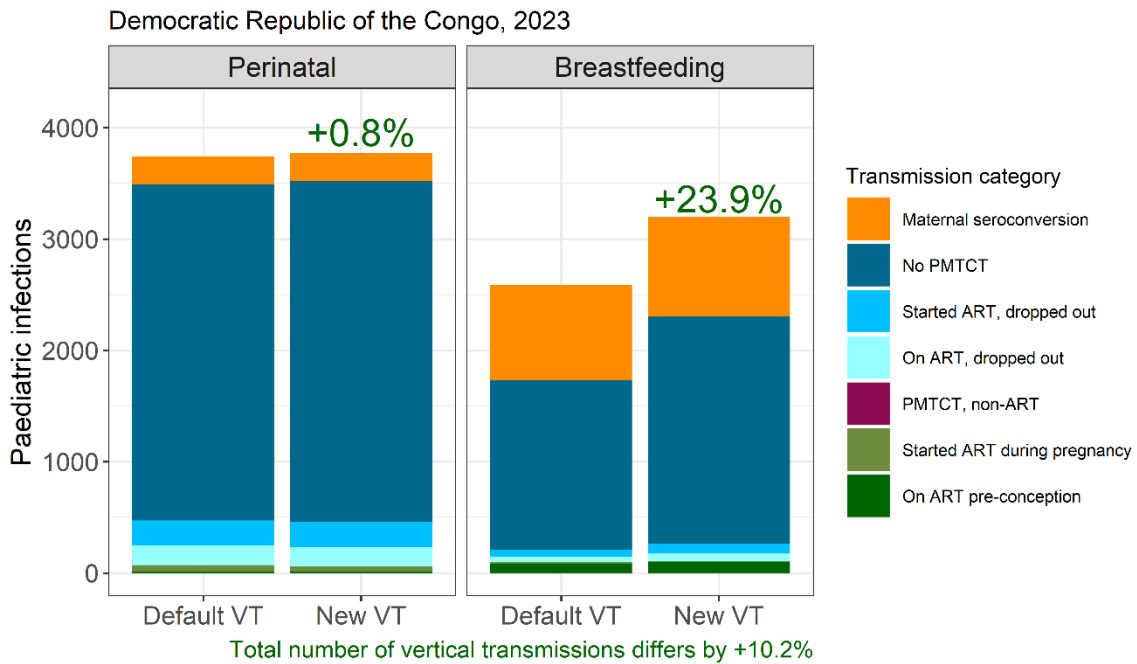

**Figure S6.12.** Change in vertical infections due to estimated vertical transmission probabilities by infection timing, Democratic Republic of the Congo 2023

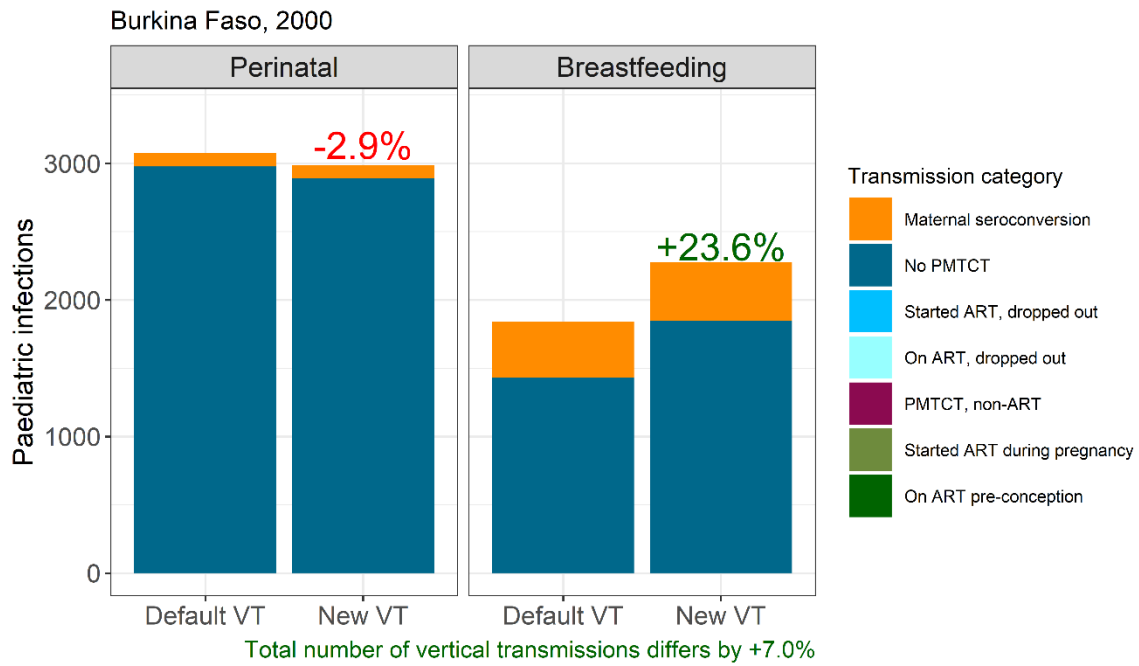

**Figure S6.13.** Change in vertical infections due to estimated vertical transmission probabilities by infection timing, Burkina Faso 2000

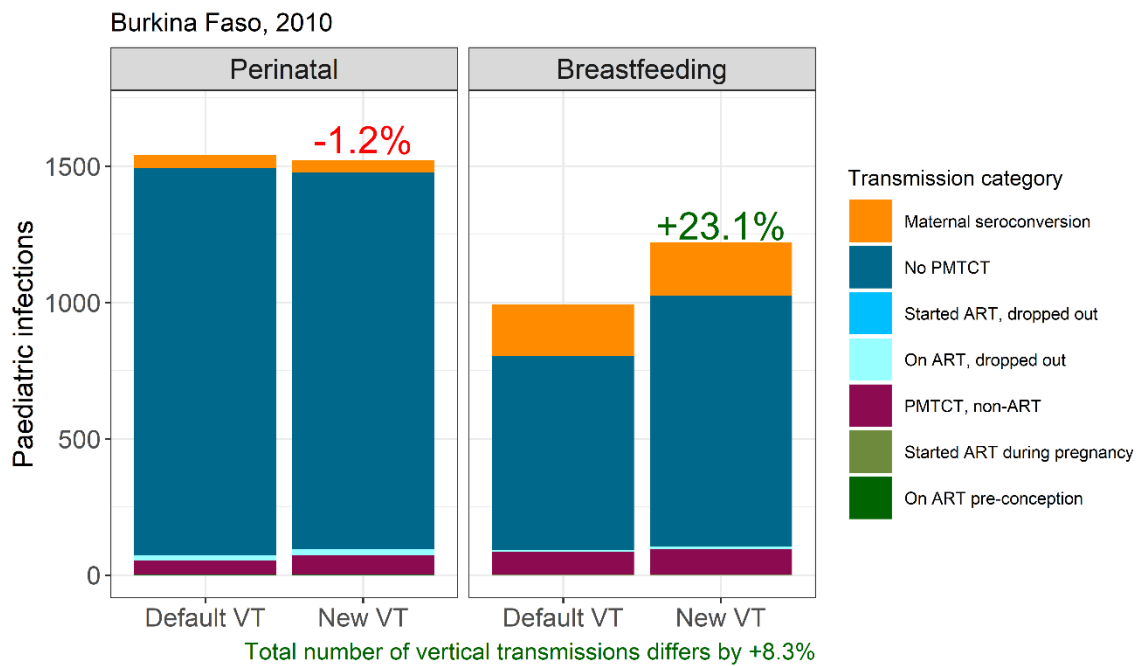

**Figure S6.14.** Change in vertical infections due to estimated vertical transmission probabilities by infection timing, Burkina Faso 2010

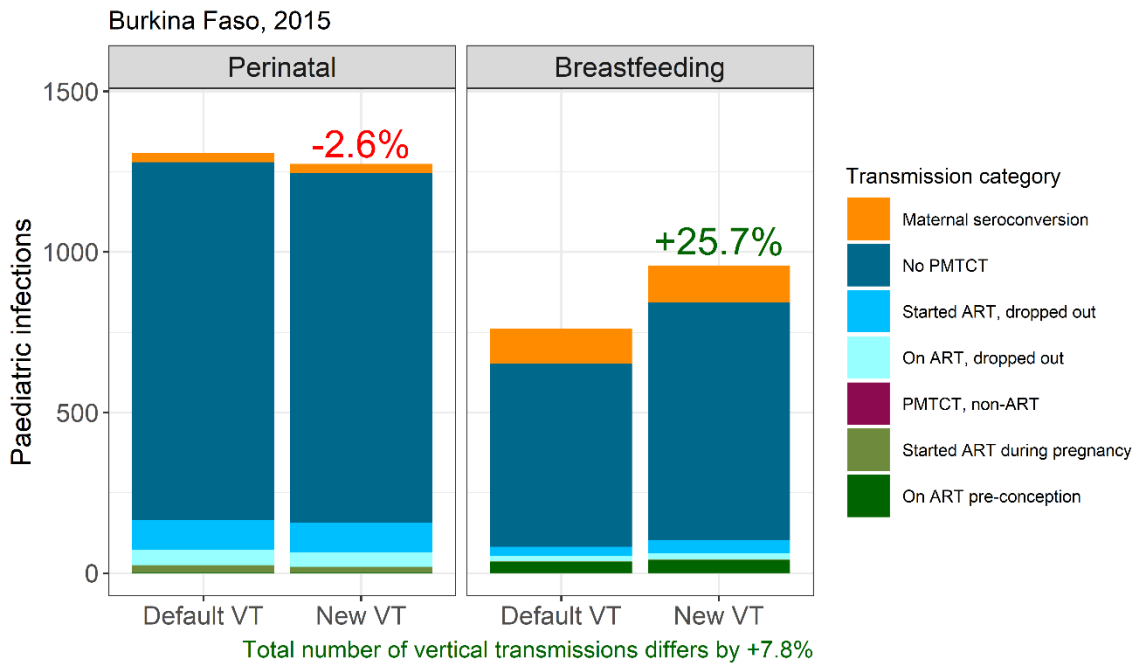

**Figure S6.15.** Change in vertical infections due to estimated vertical transmission probabilities by infection timing, Burkina Faso 2015

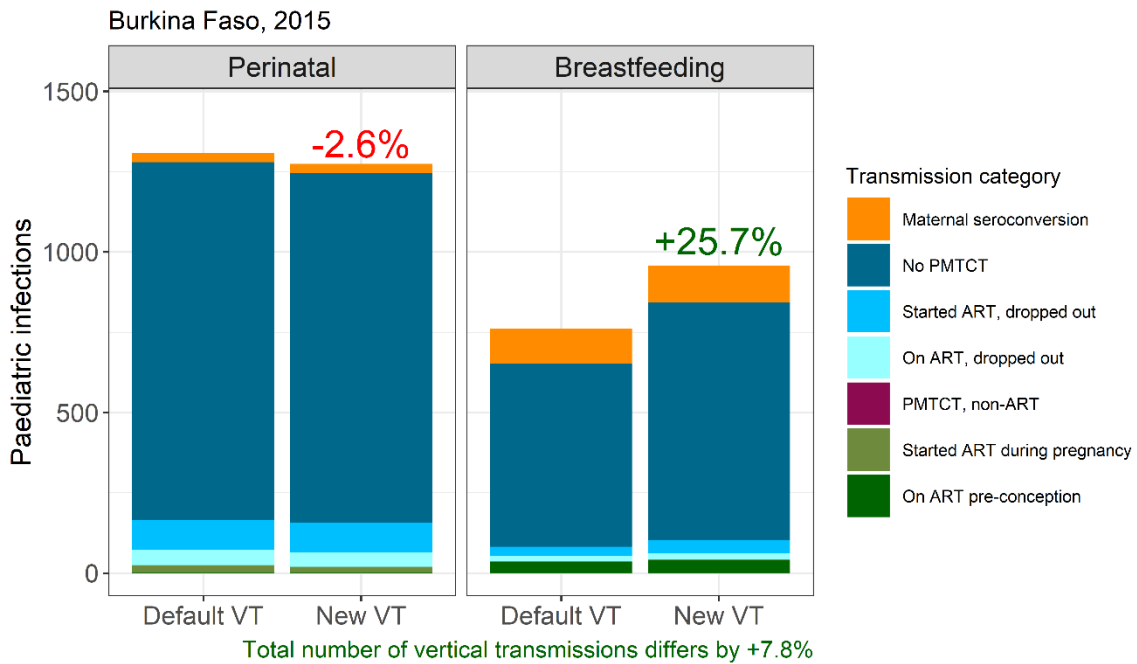

**Figure S6.16.** Change in vertical infections due to estimated vertical transmission probabilities by infection timing, Burkina Faso 2023



## S7. References

- 1 Stover J, Glaubius R. Methods and Assumptions for Estimating Key HIV Indicators in the UNAIDS Annual Estimates Process. *JAIDS J Acquir Immune Defic Syndr* 2024; **95**: e5.
- 2 Stover J, Glaubius R, Mofenson L, *et al.* Updates to the Spectrum/AIM model for estimating key HIV indicators at national and subnational levels. *AIDS Lond Engl* 2019; **33**: S227–34.
- 3 Rollins N, Mahy M, Becquet R, Kuhn L, Creek T, Mofenson L. Estimates of peripartum and postnatal mother-to-child transmission probabilities of HIV for use in Spectrum and other population-based models. *Sex Transm Infect* 2012; **88**: i44–51.
- 4 Govender S, Ot wombe K, Essien T, *et al.* CD4 Counts and Viral Loads of Newly Diagnosed HIV-Infected Individuals: Implications for Treatment as Prevention. *PLOS ONE* 2014; **9**: e90754.
- 5 Leroy V, Montcho C, Manigart O, *et al.* Maternal plasma viral load, zidovudine and mother-to-child transmission of HIV-1 in Africa: DITRAME ANRS 049a trial. *AIDS Lond Engl* 2001; **15**: 517–22.
- 6 Mussini C, Pinti M, Bugarini R, *et al.* Effect of treatment interruption monitored by CD4 cell count on mitochondrial DNA content in HIV-infected patients: a prospective study. *AIDS* 2005; **19**: 1627.
