# Supplementary material for: Probability of vertical HIV transmission: A systematic review and meta-regression
Source: PubMed Central journal article supplement — medRxiv. 2025 Apr 17:2024.12.03.24318418. Originally published 2024 Dec 5. Preprint. [Version 2] doi: 10.1101/2024.12.03.24318418 (PMC11643157; doi:10.1101/2024.12.03.24318418), 2025-04-17

Previous Reviews

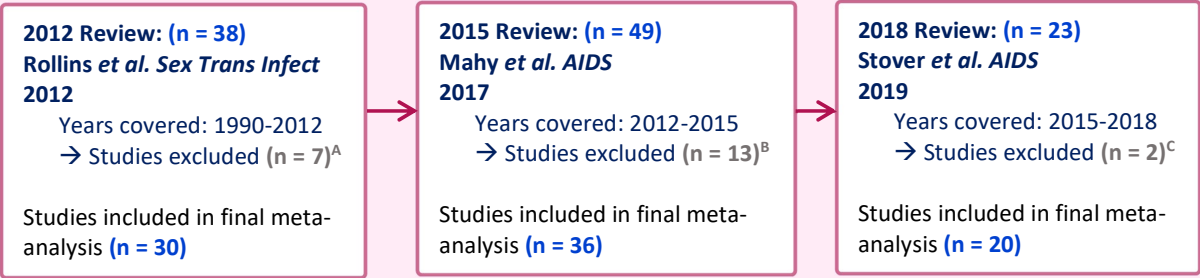

Previous reviews informed the 2024 review approach

2024 Systematic Review

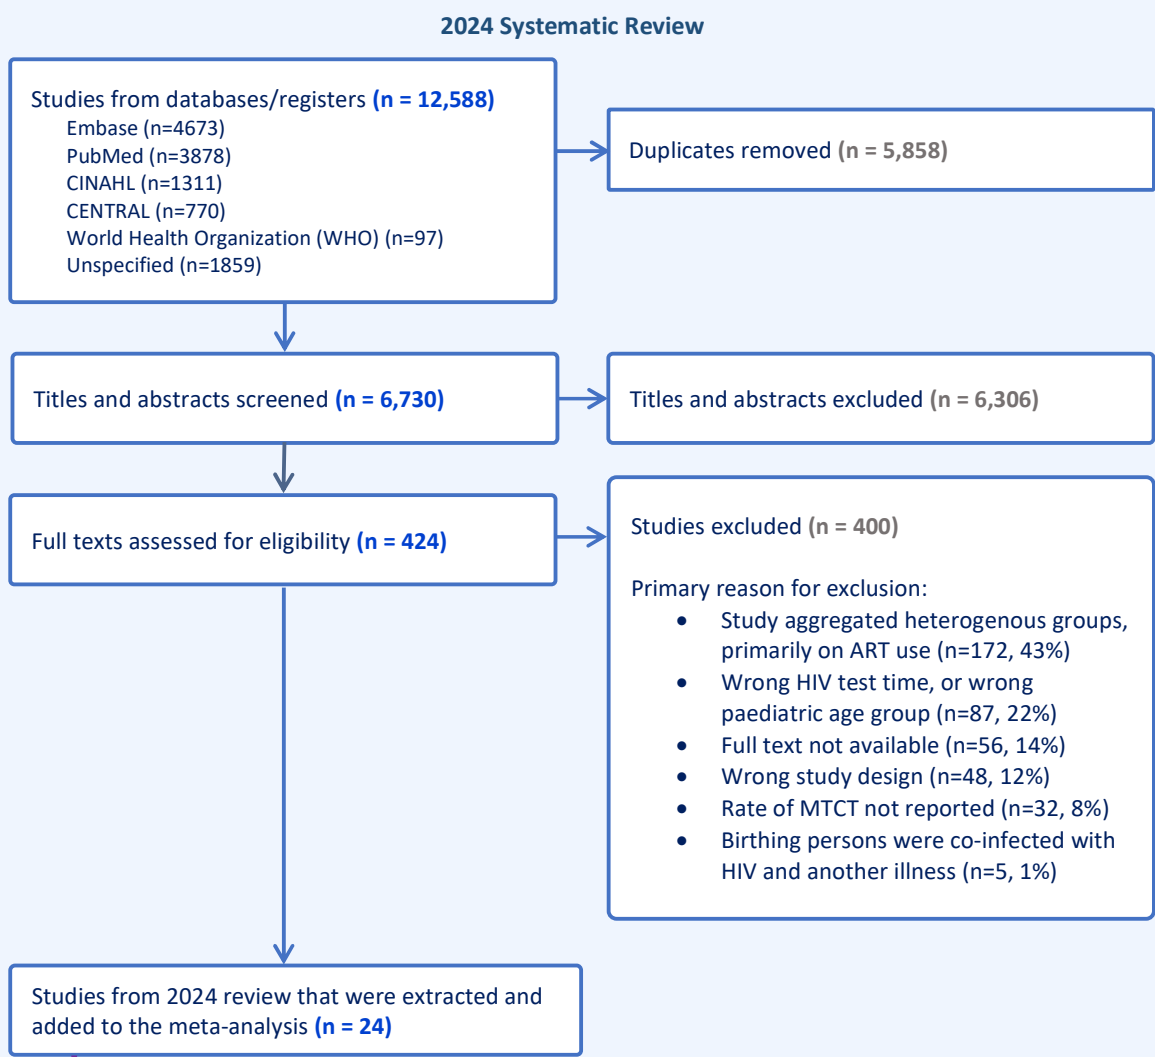

Total number of studies included in the final 2024 meta-regression (n = 110)

2024 Meta-analysis

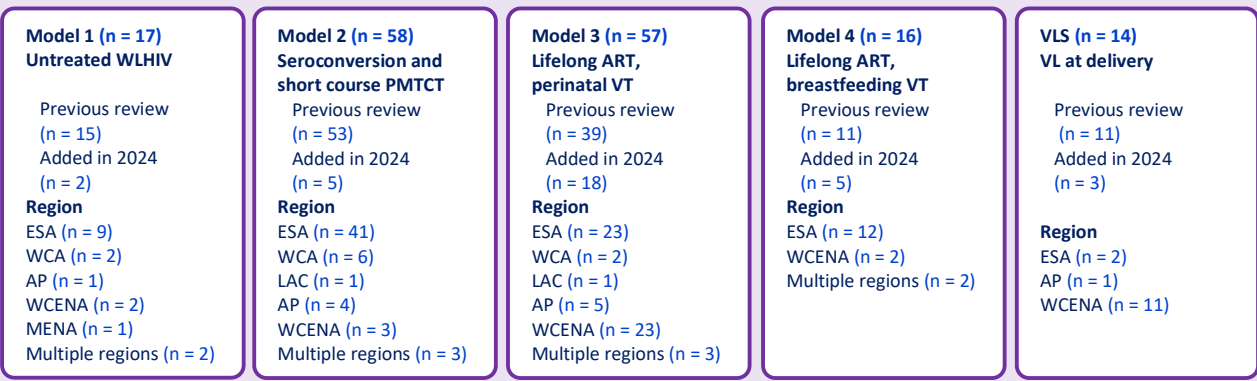

Supplement: media-2.pdf [file media-2.pdf]
