# Supplementary figures and images for: Probability of vertical HIV transmission: A systematic review and meta-regression
Source: PubMed Central journal article supplement — medRxiv. 2025 Apr 17:2024.12.03.24318418. Originally published 2024 Dec 5. Preprint. [Version 2] doi: 10.1101/2024.12.03.24318418 (PMC11643157; doi:10.1101/2024.12.03.24318418), 2025-04-17

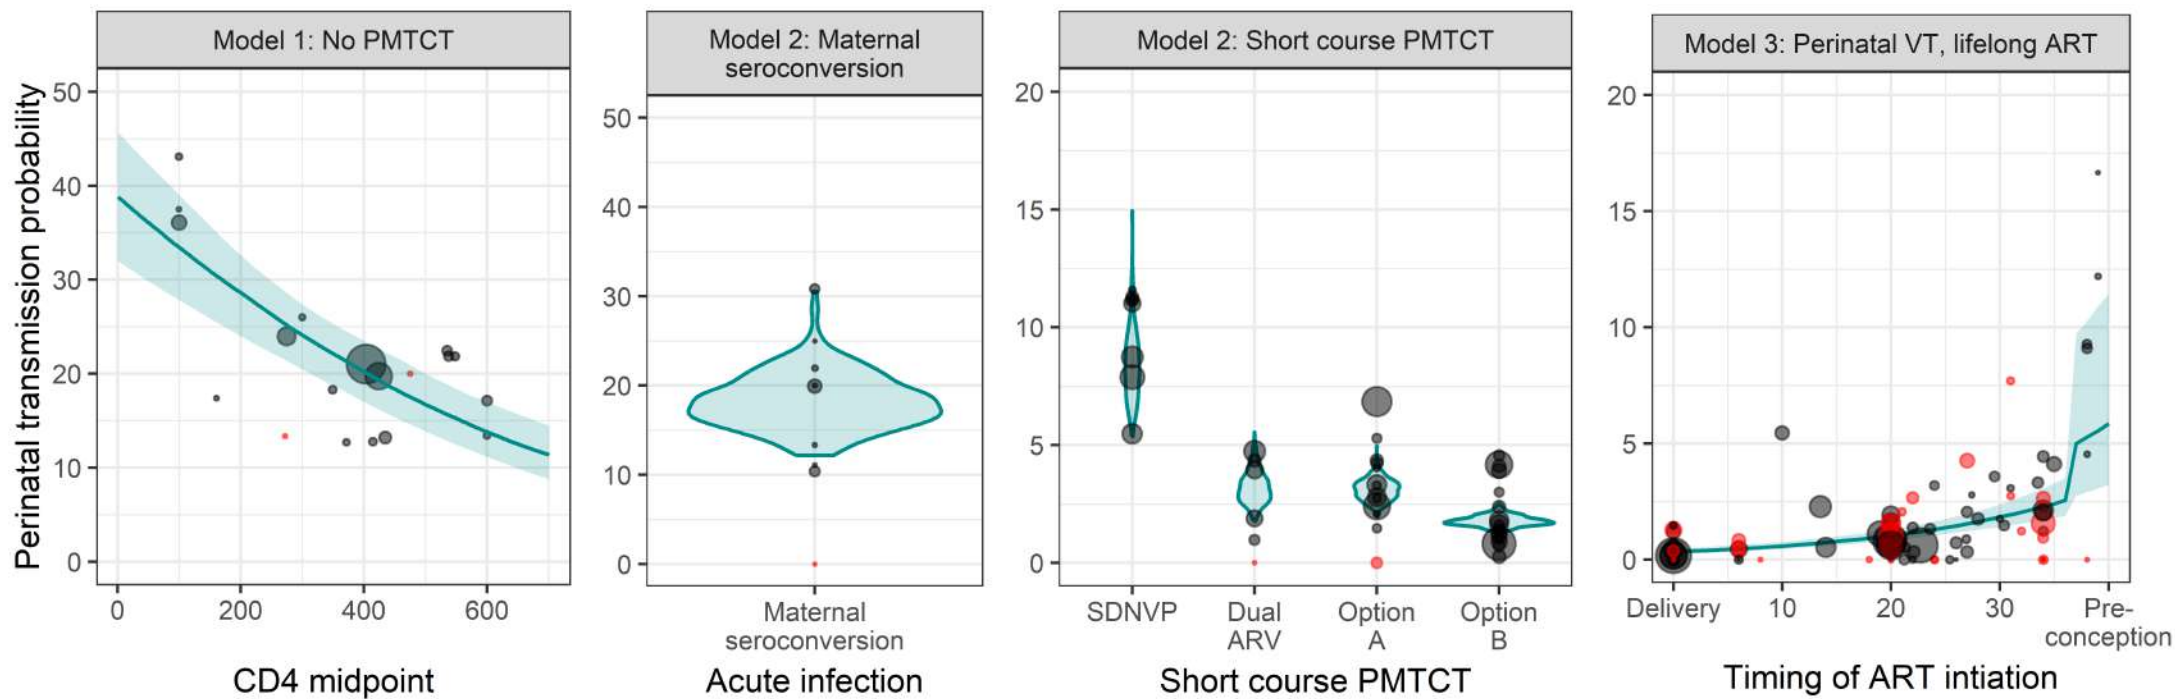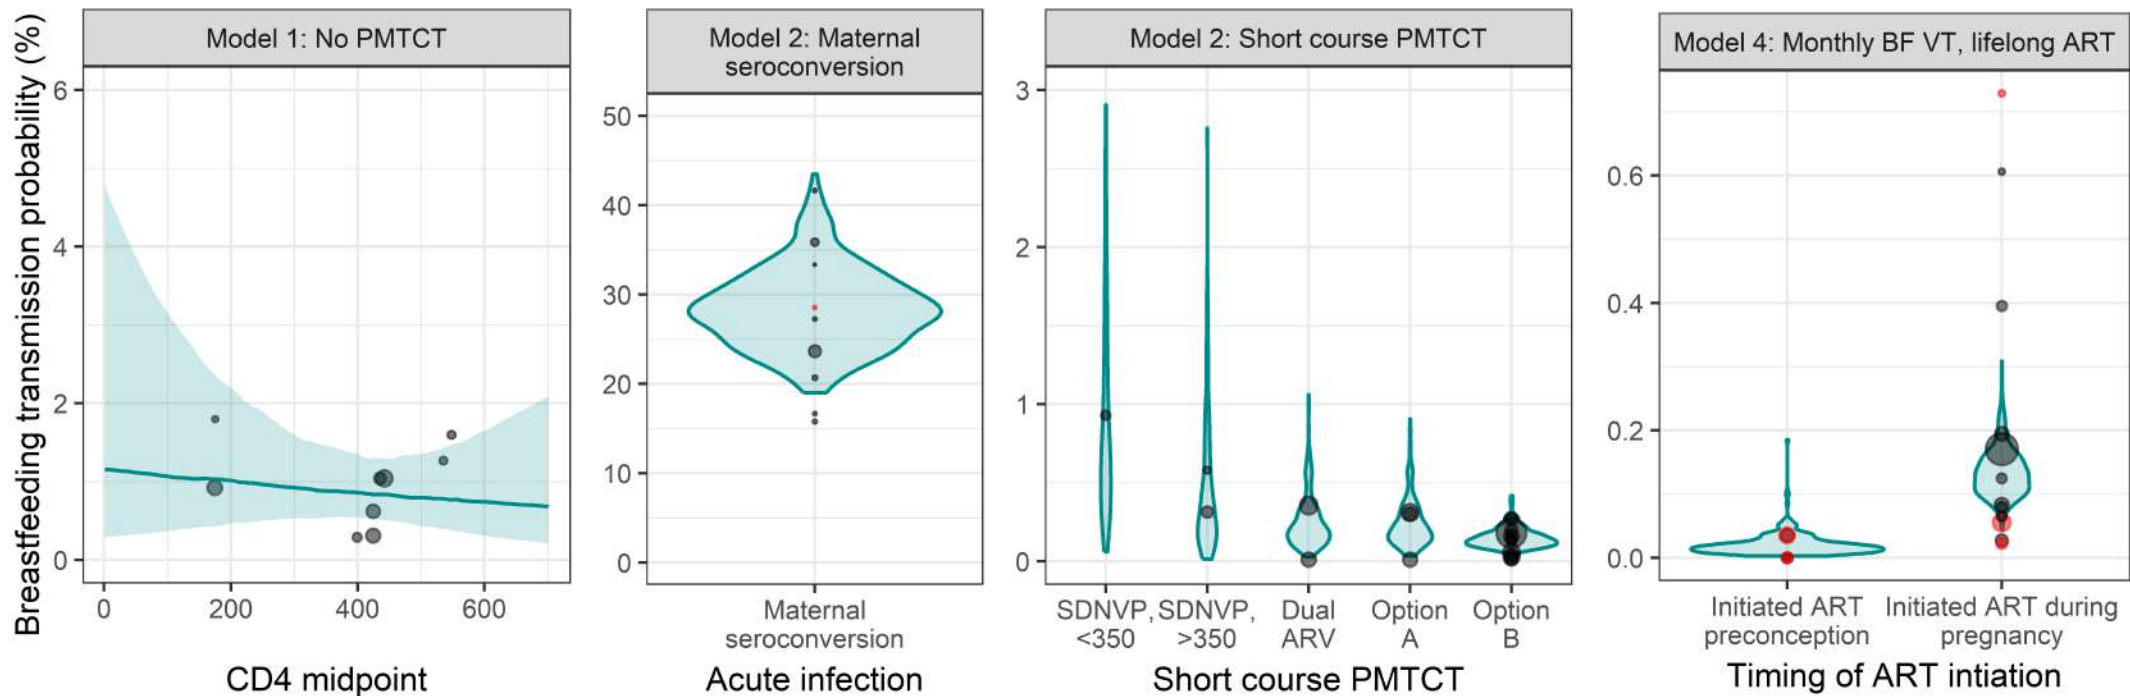

Added in 2024 review

● No ● Yes

· 0 ● 1000 ● 2000 ● 3000 ● 4000 ● 5000

N

Supplement: media-3.pdf [file media-3.pdf]

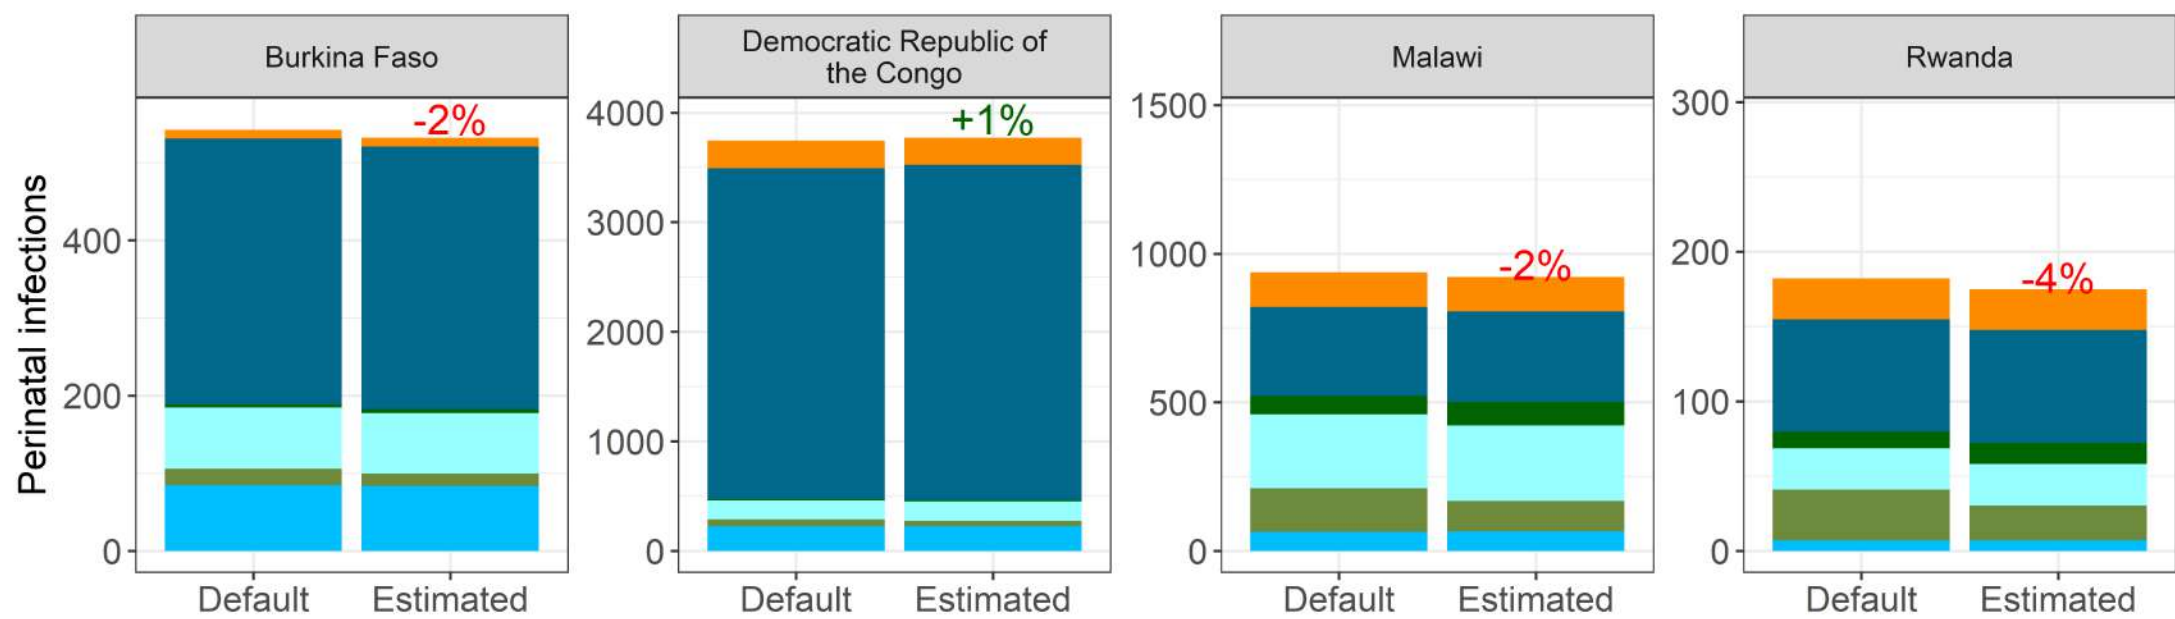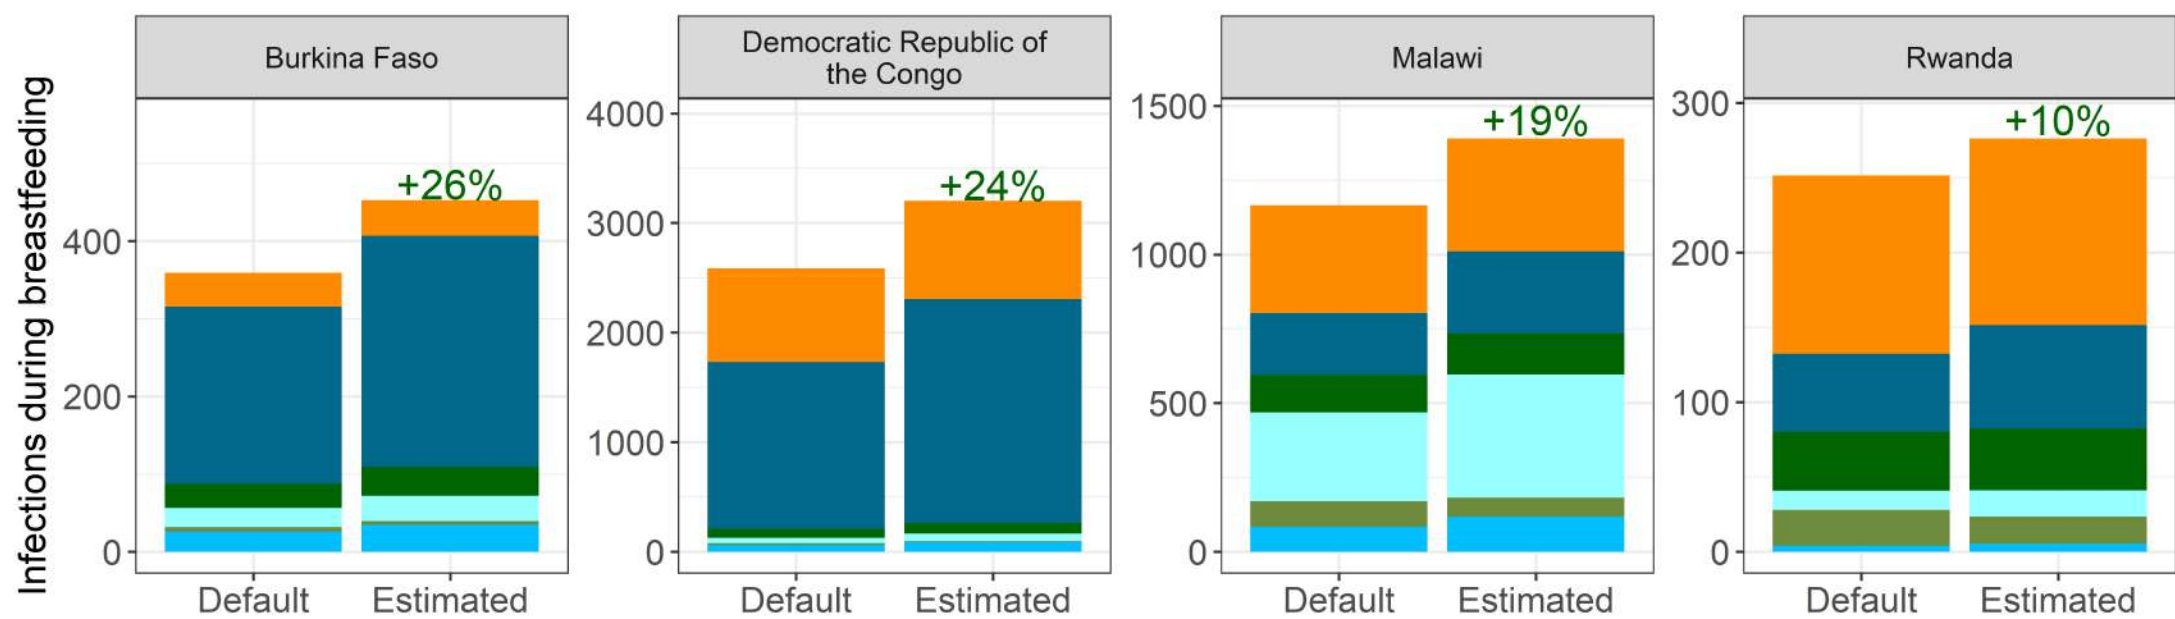

Vertical transmission probability

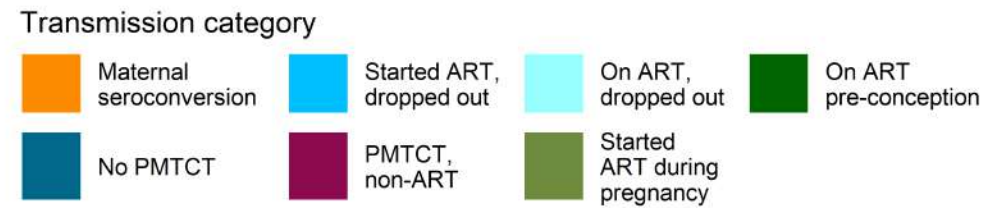

Supplement: media-4.pdf [file media-4.pdf]
